# Supplementary figures and images for: Sustainable electrochemical dehydrogenative C(sp3)–H mono/di-alkylations
Source: Royal Society of Chemistry journal article supplement (doi:10.1039/d1gc04479f), 2022-01-01

## $^1\text{H}$ , $^{13}\text{C}$ , and $^{19}\text{F}$ -NMR Data

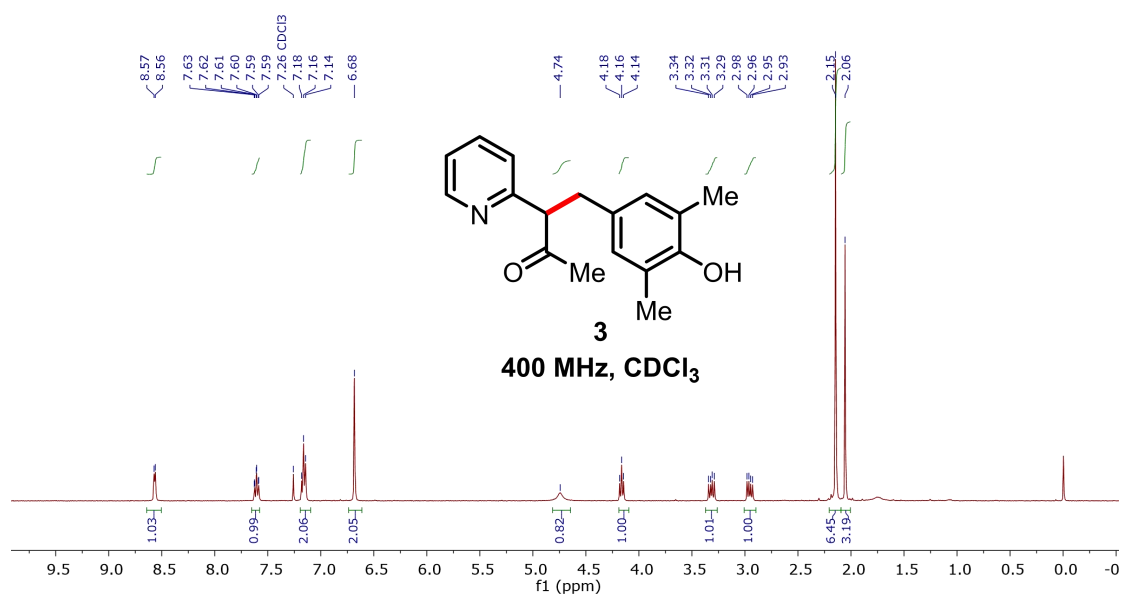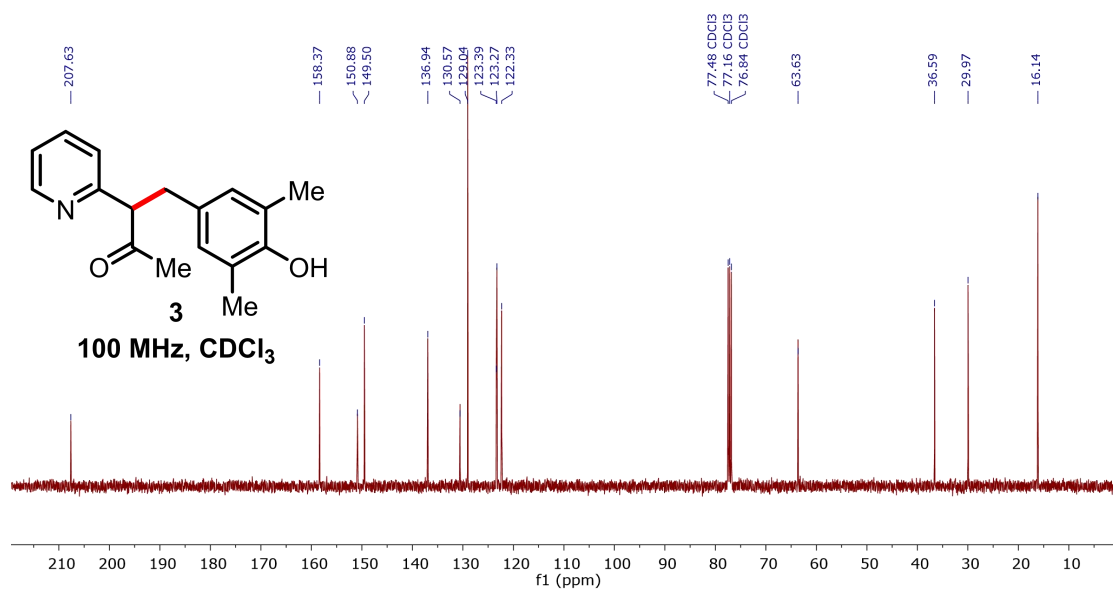

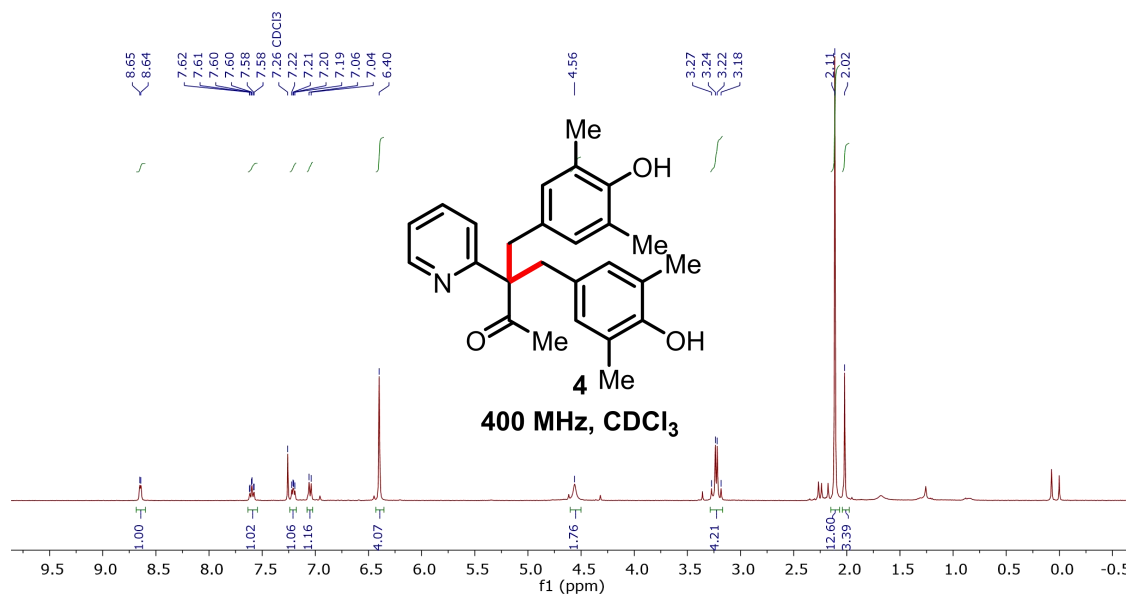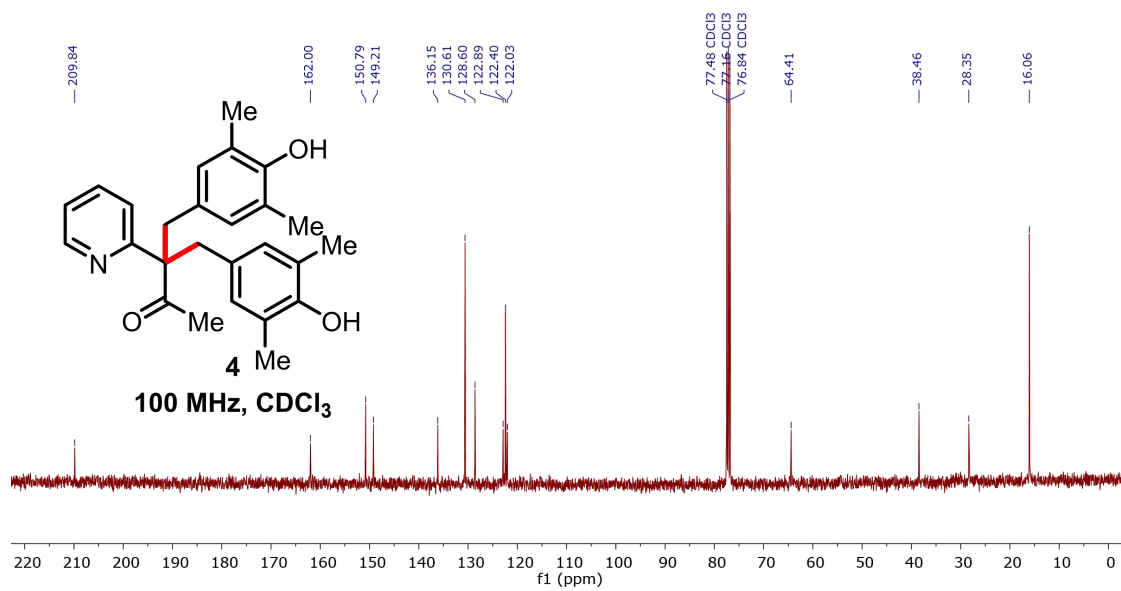

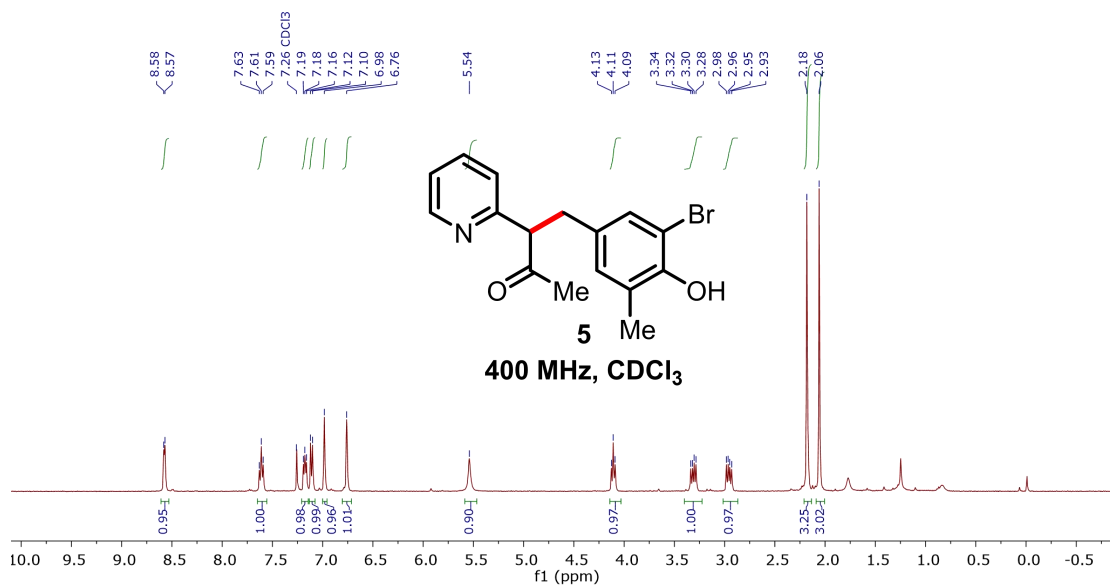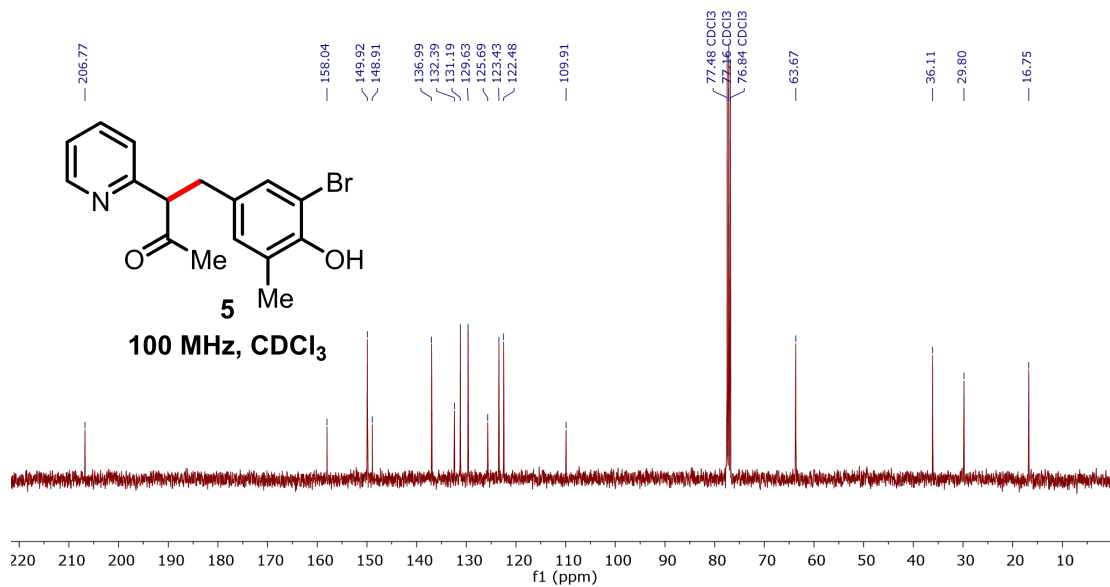

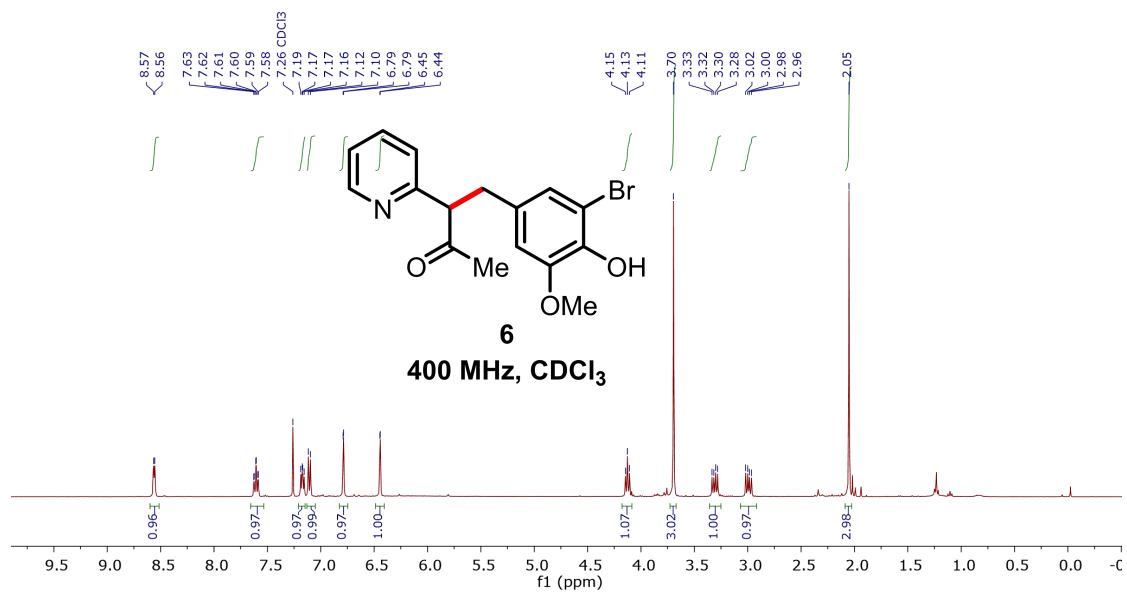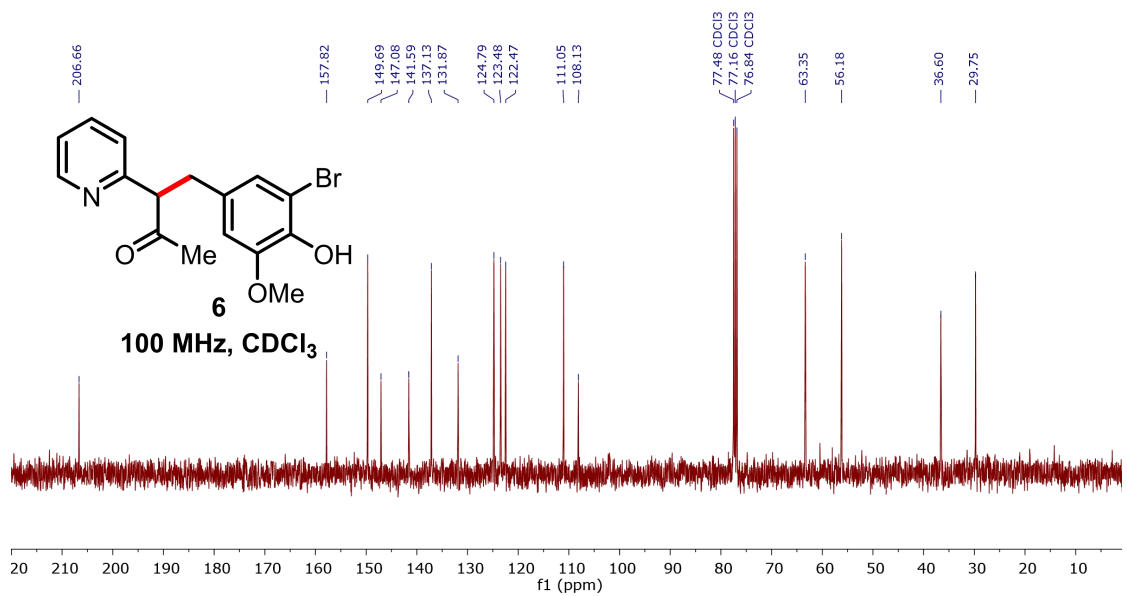



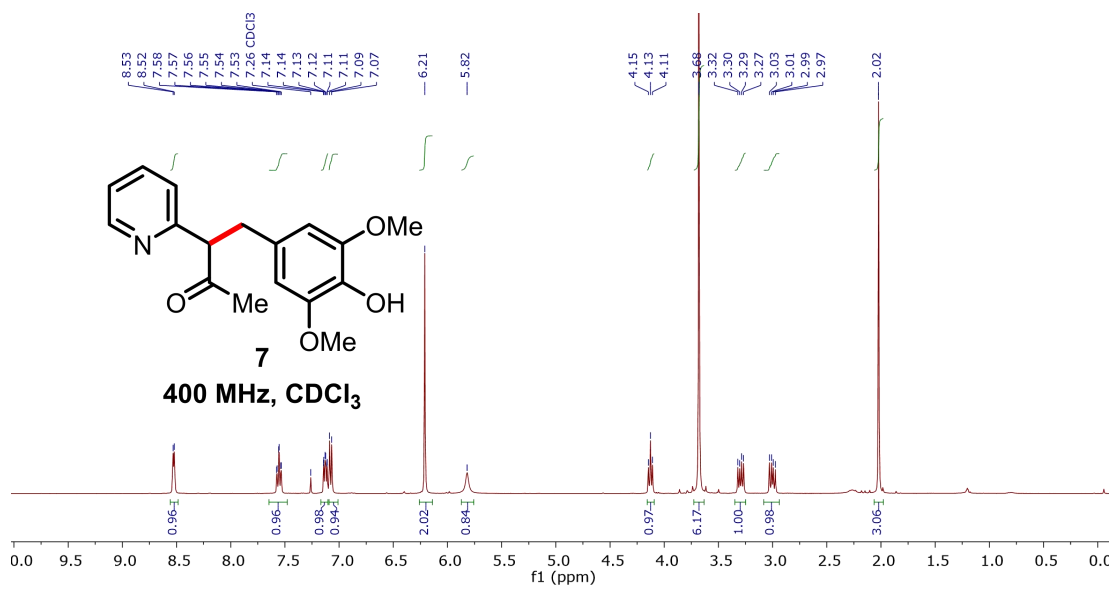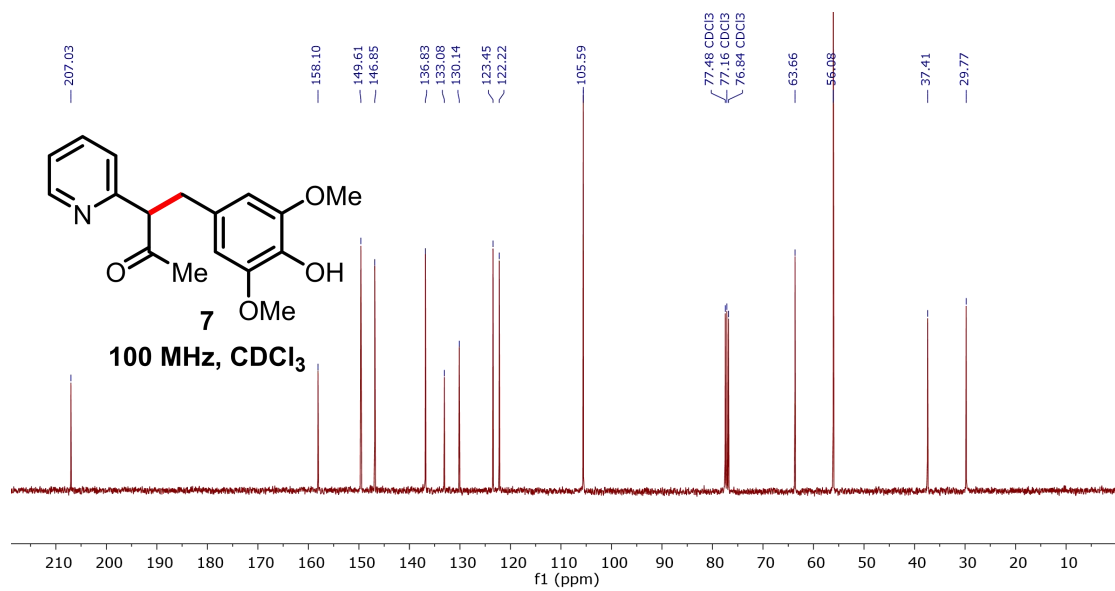

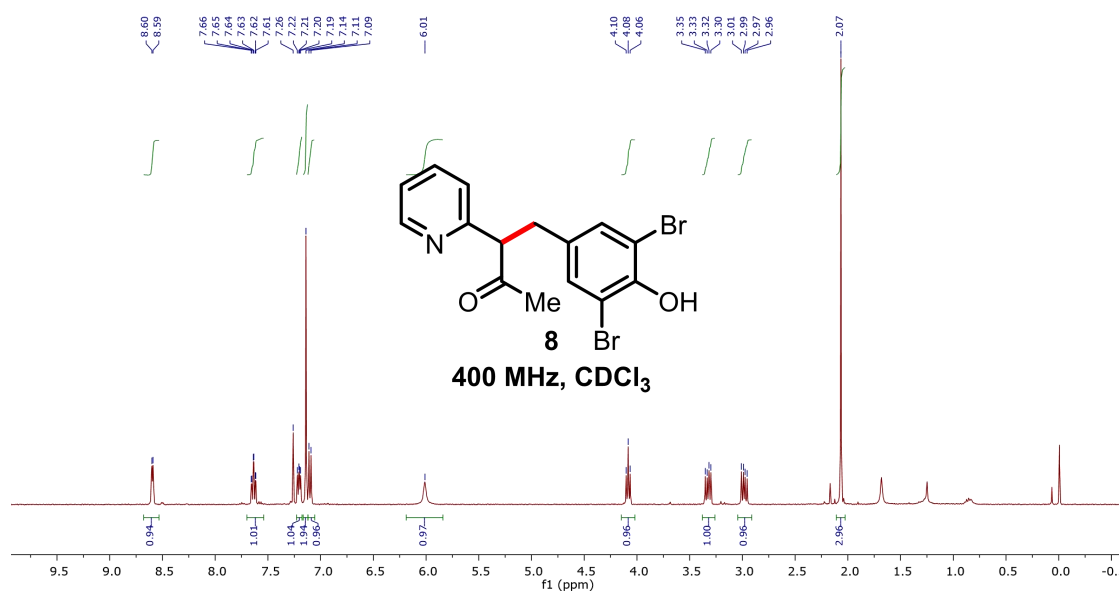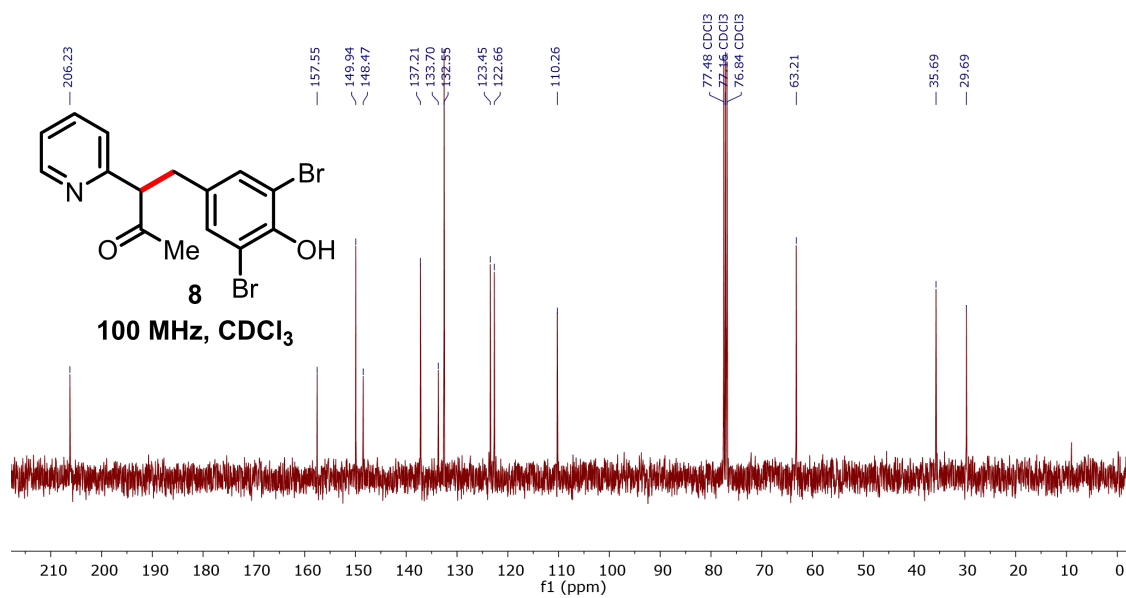

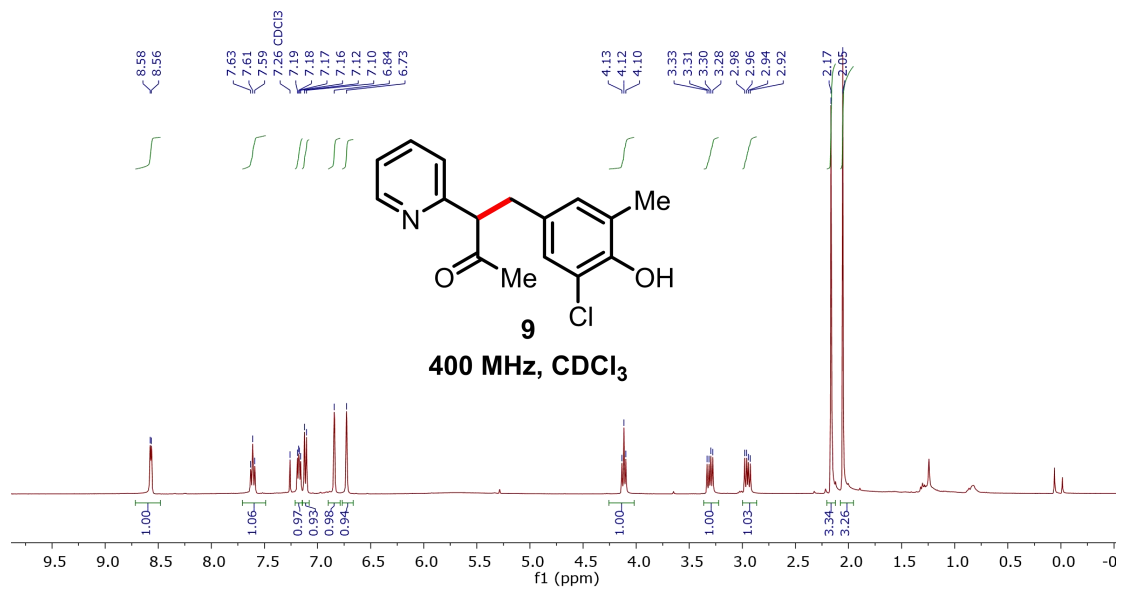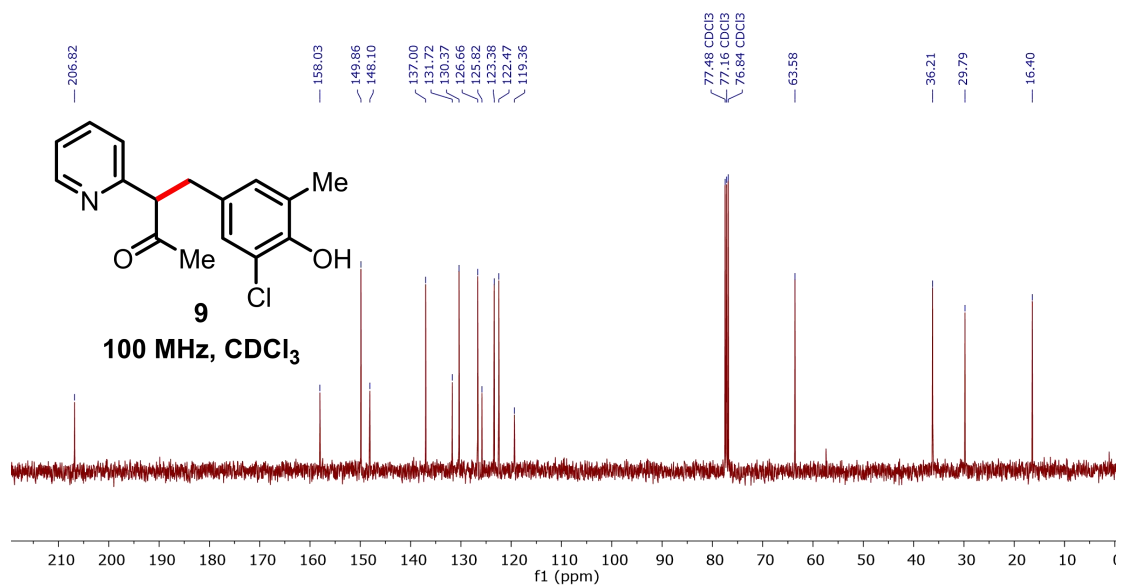

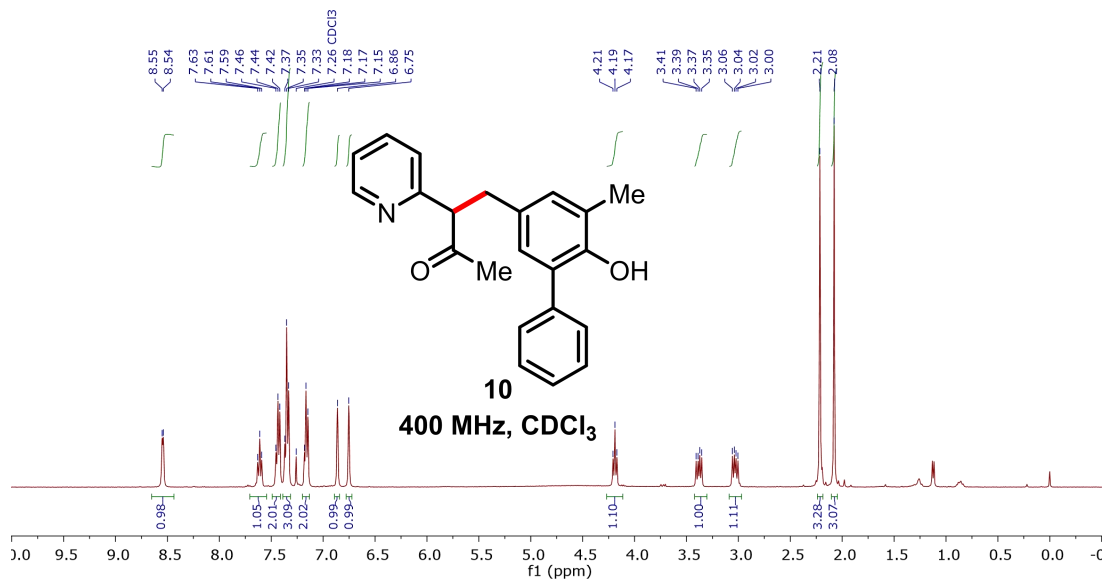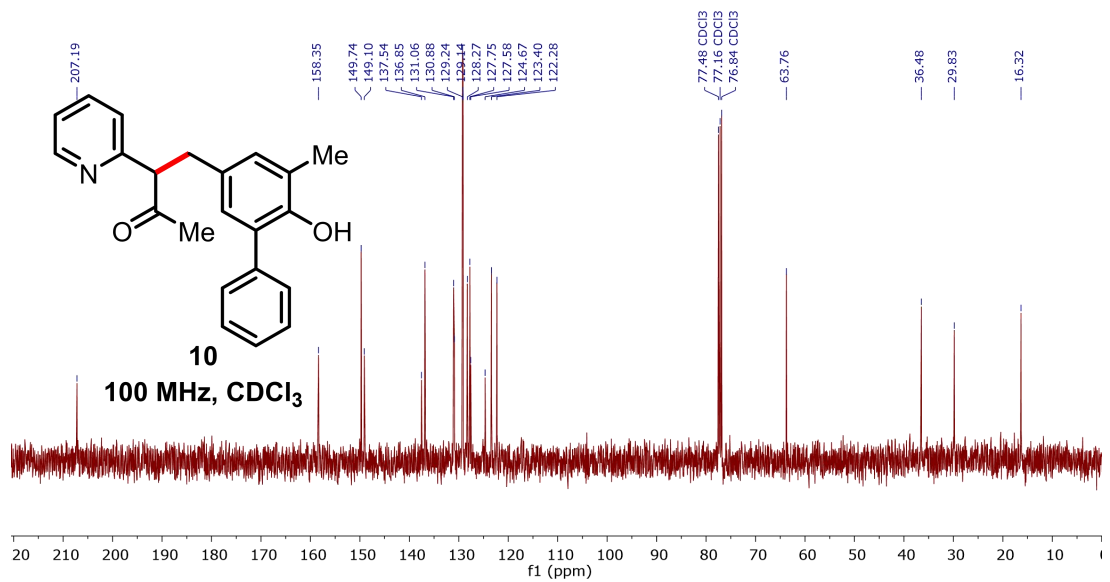

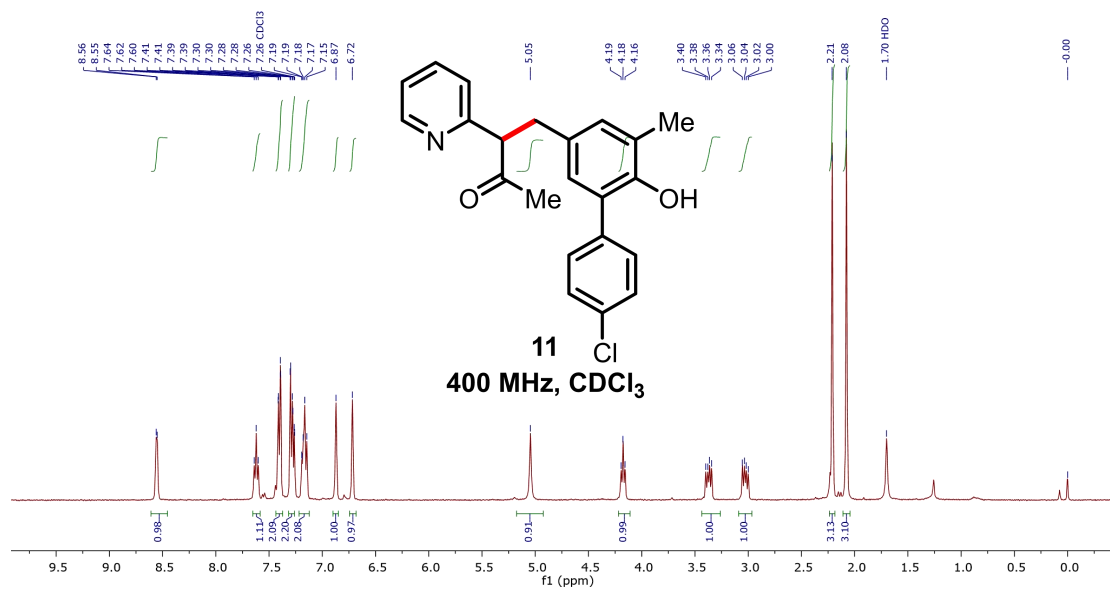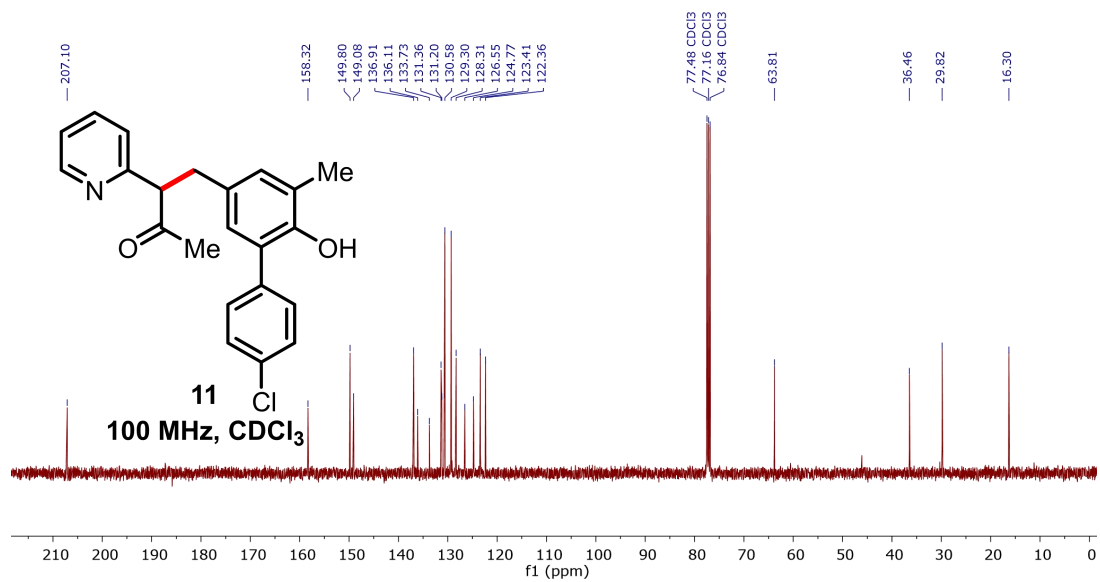

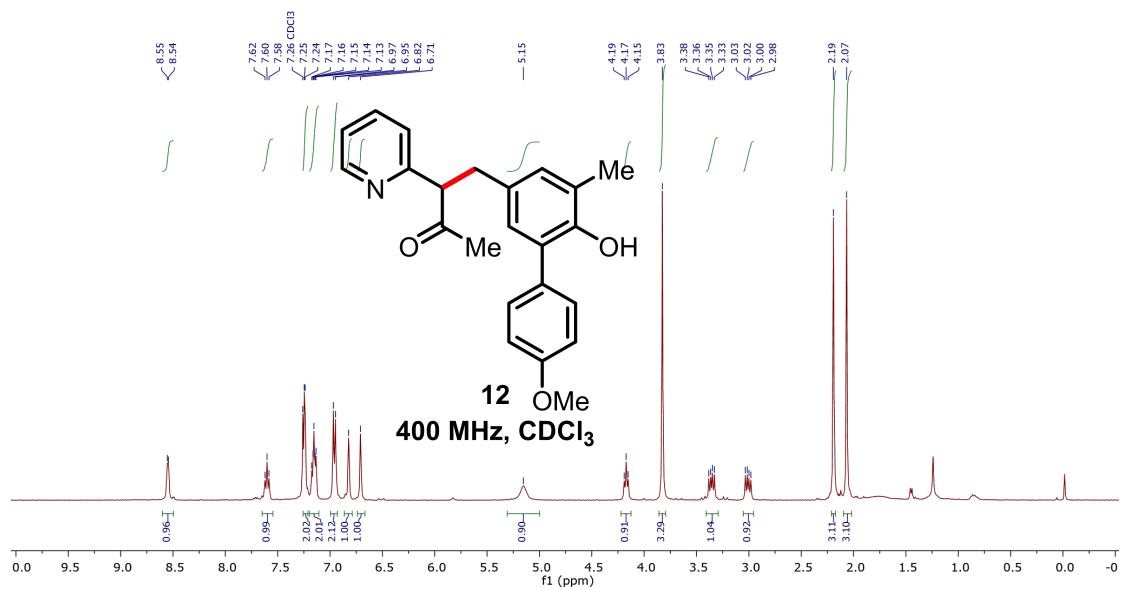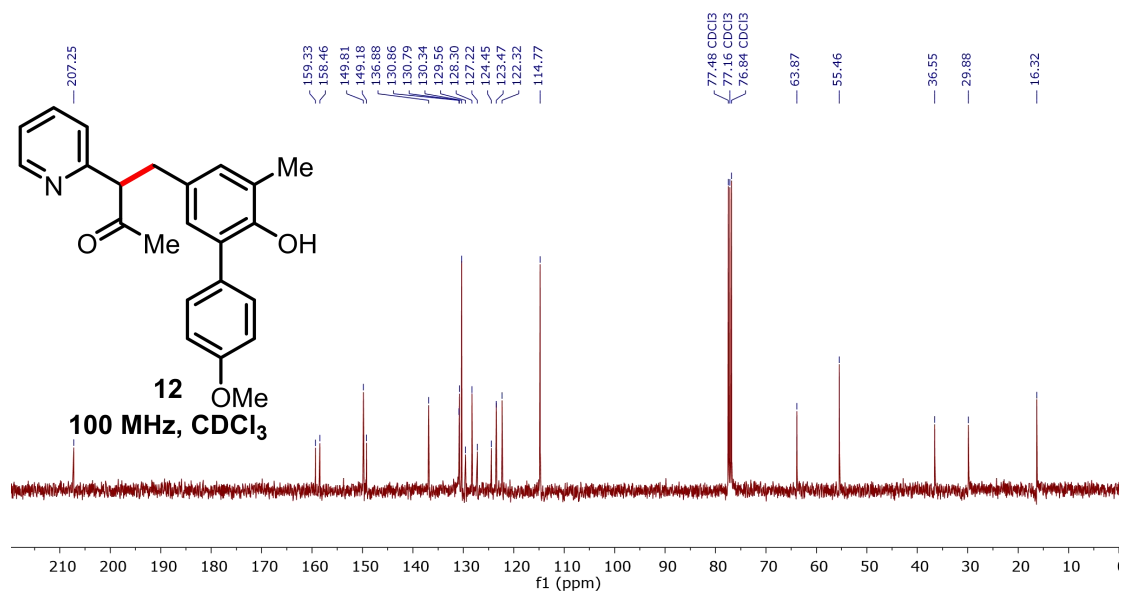

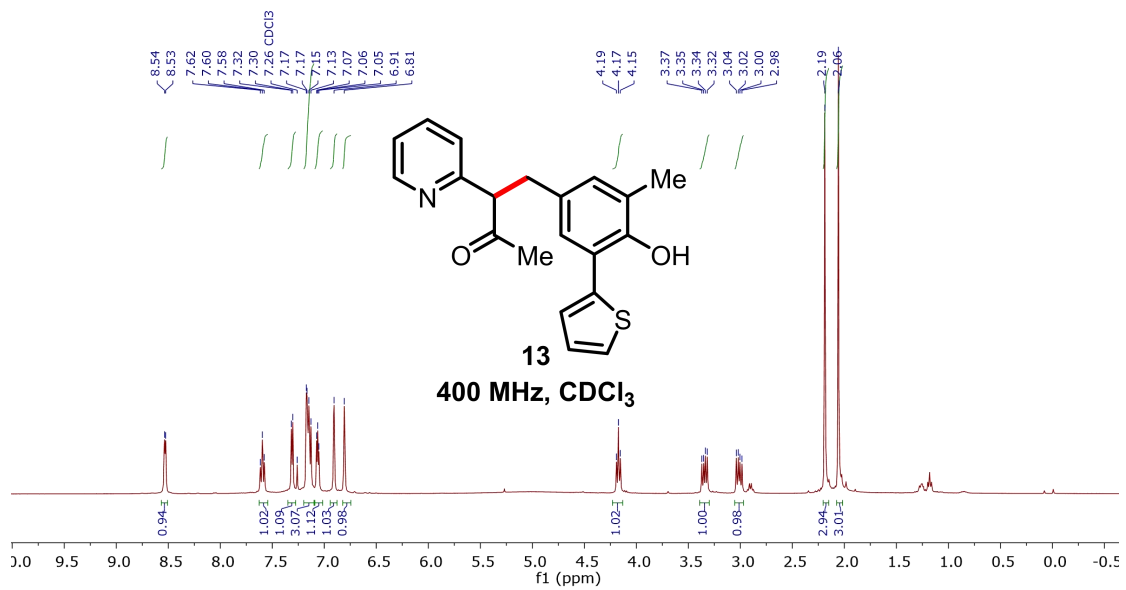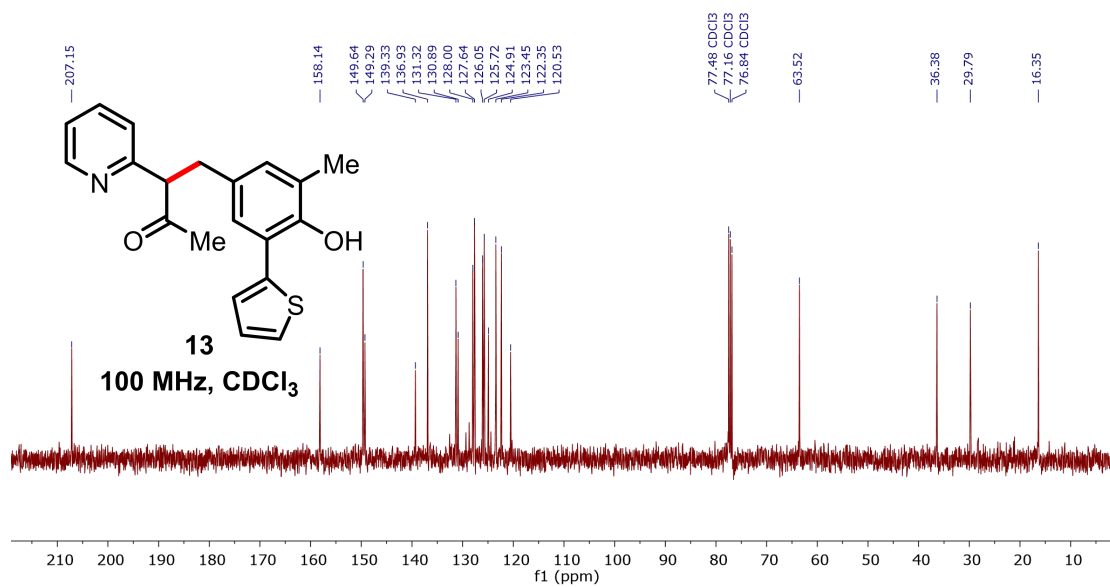

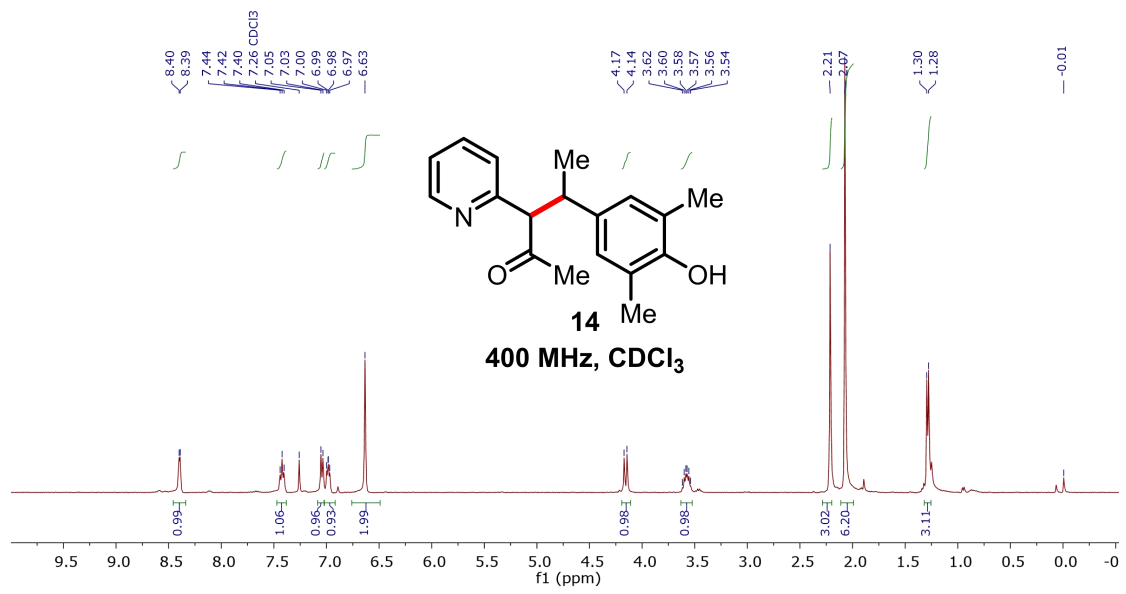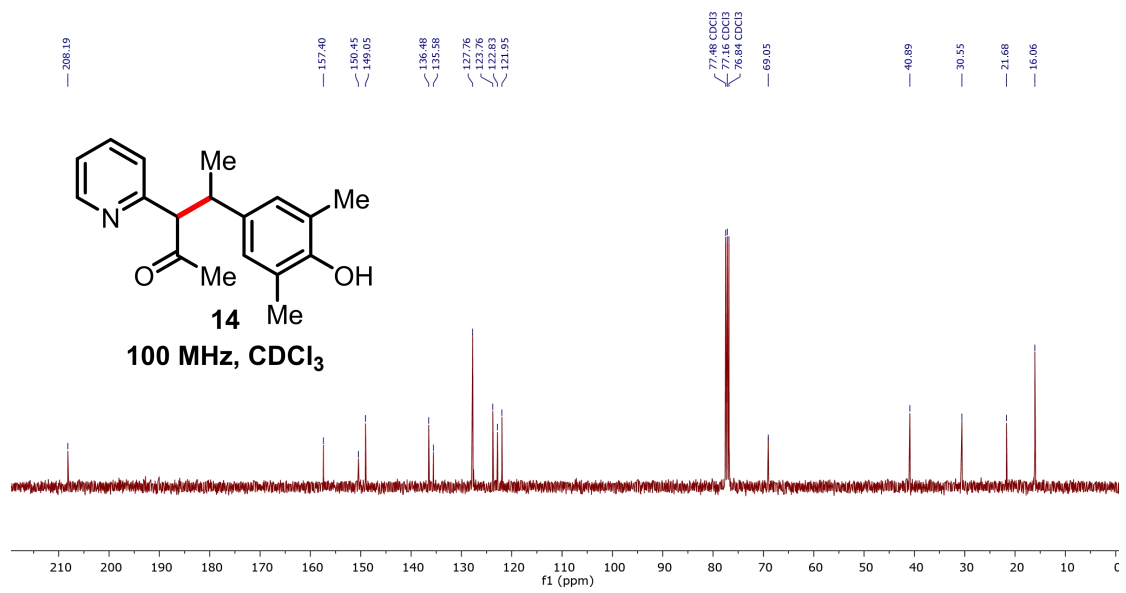



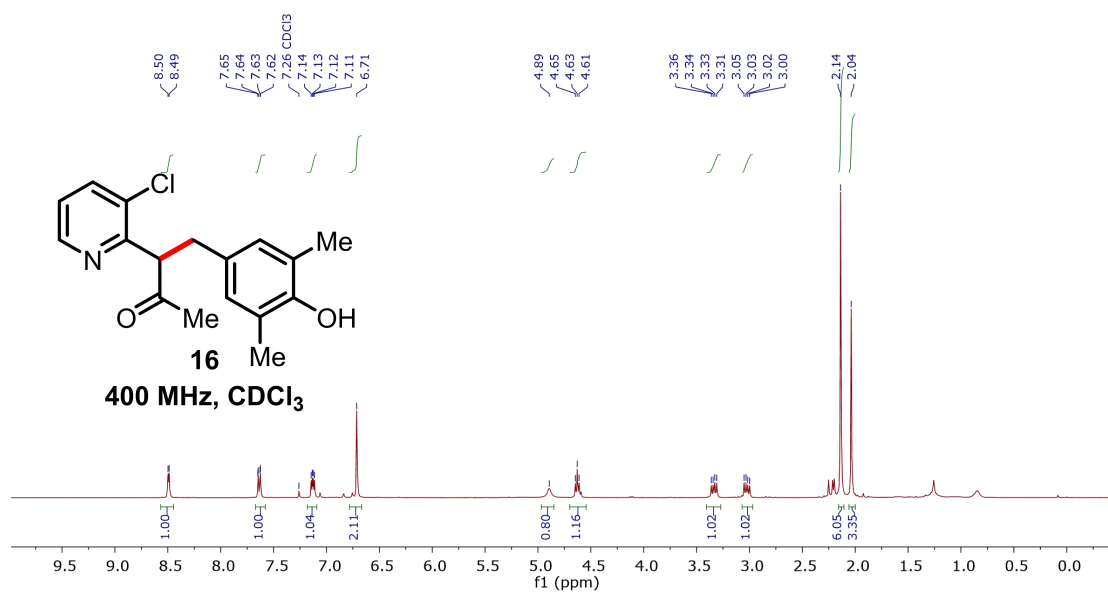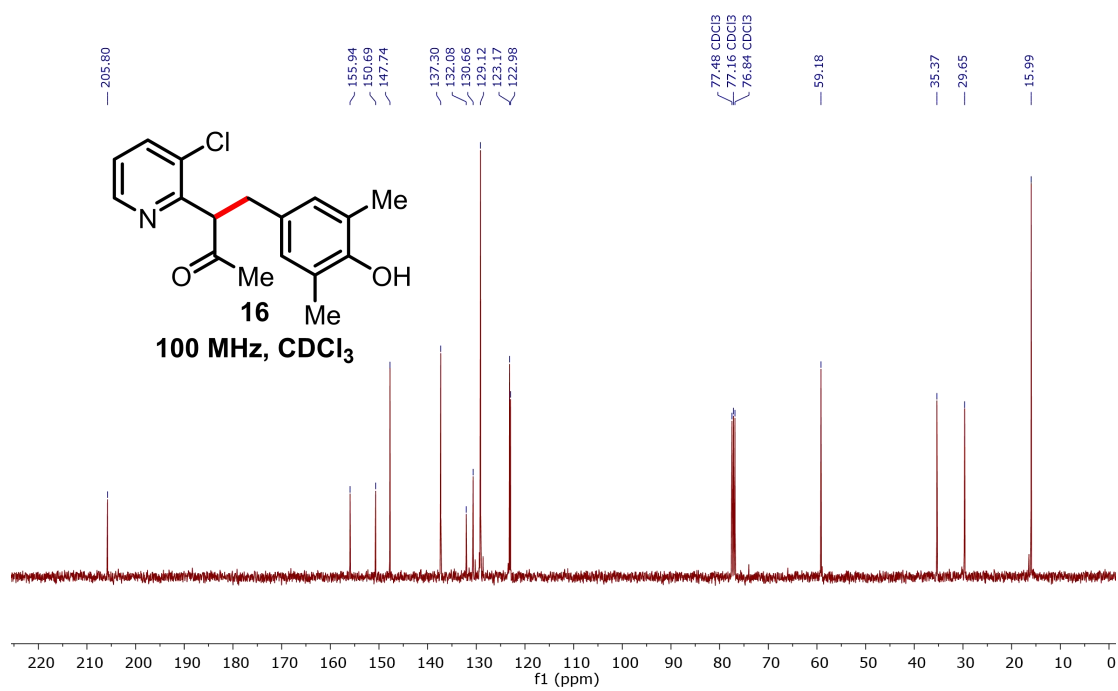

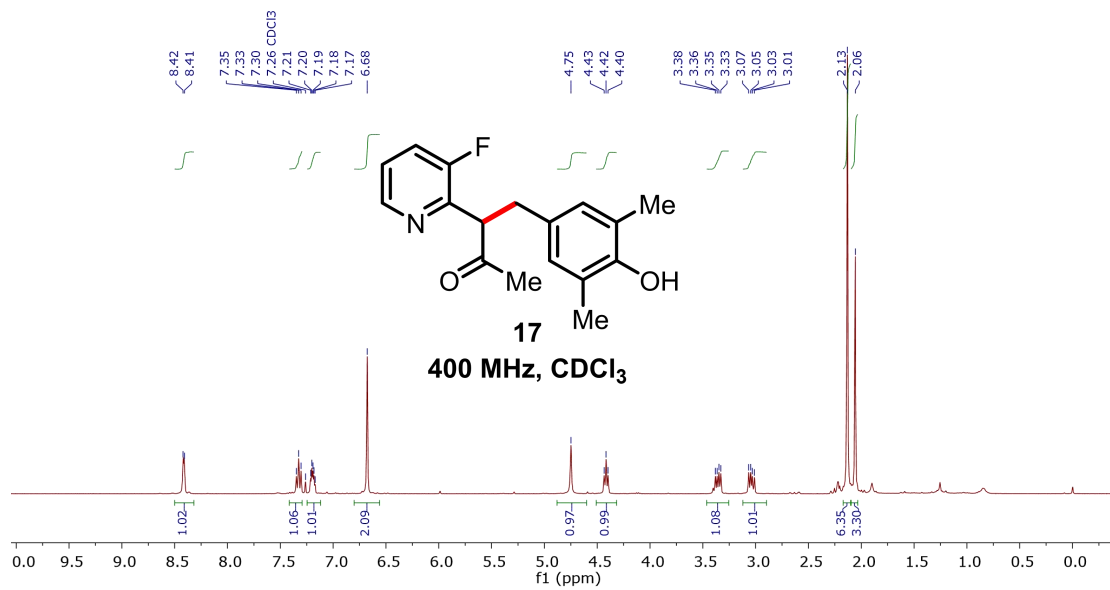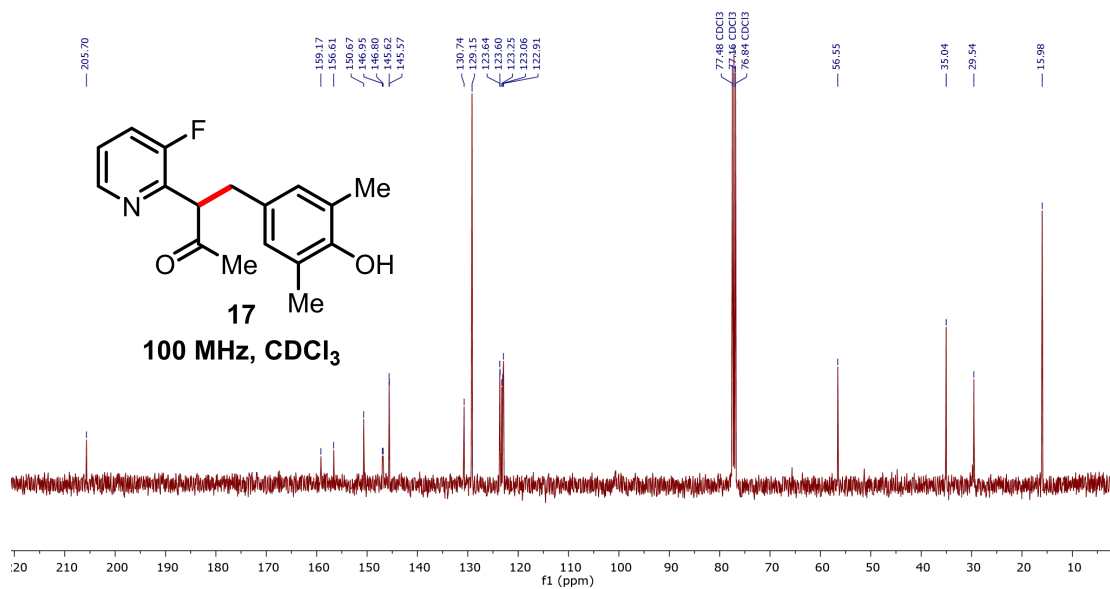

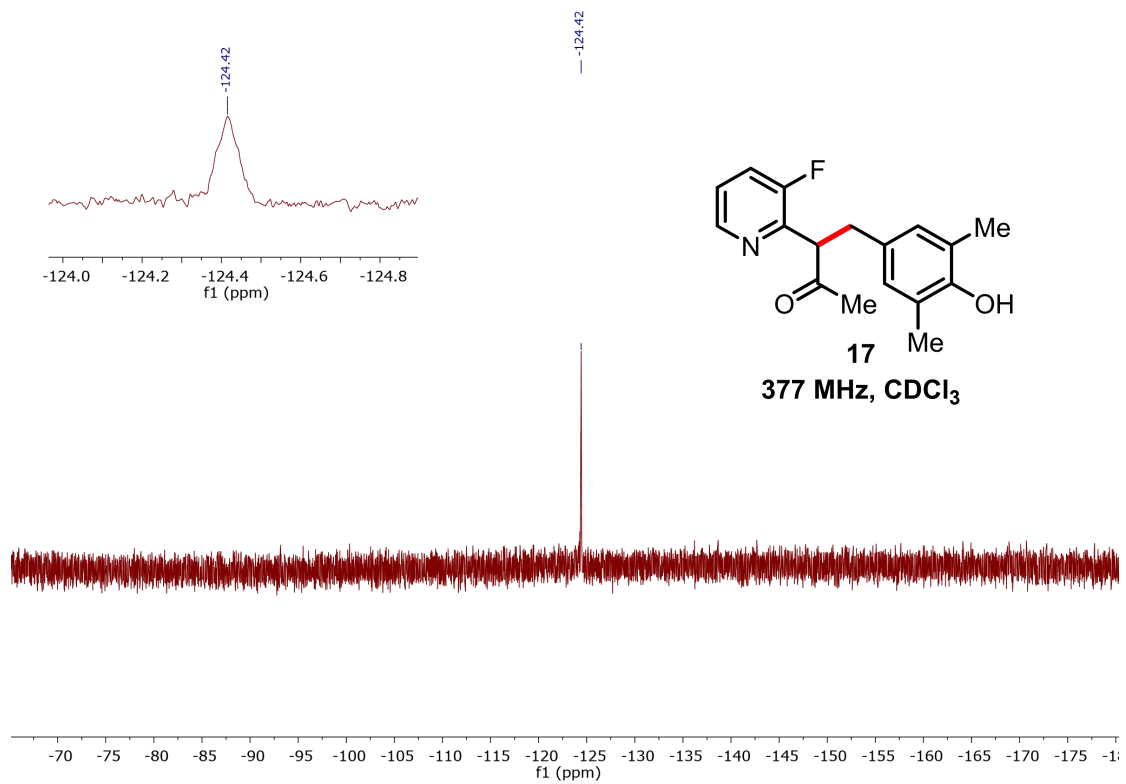

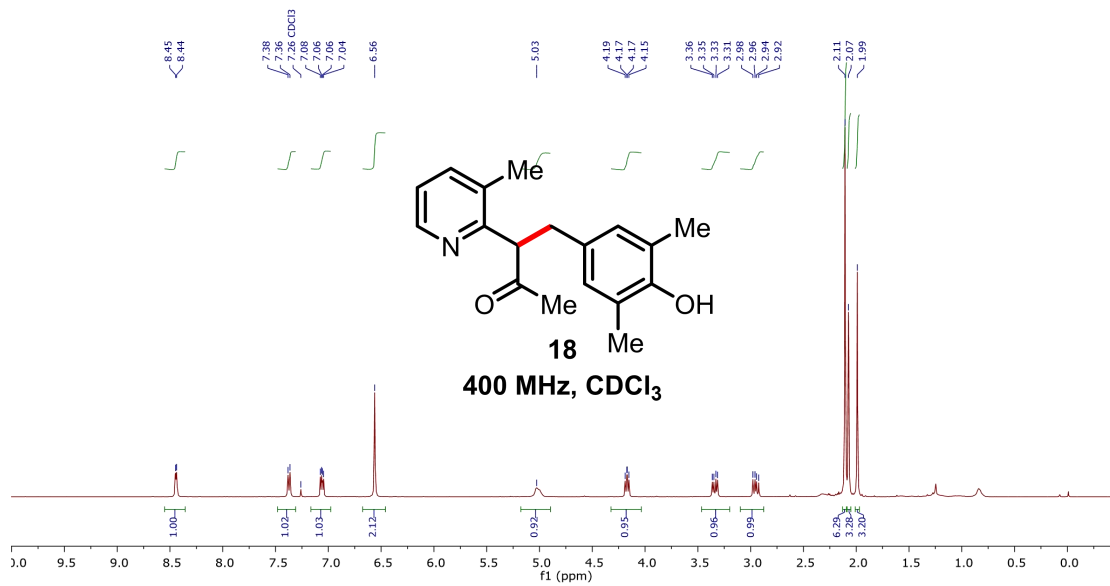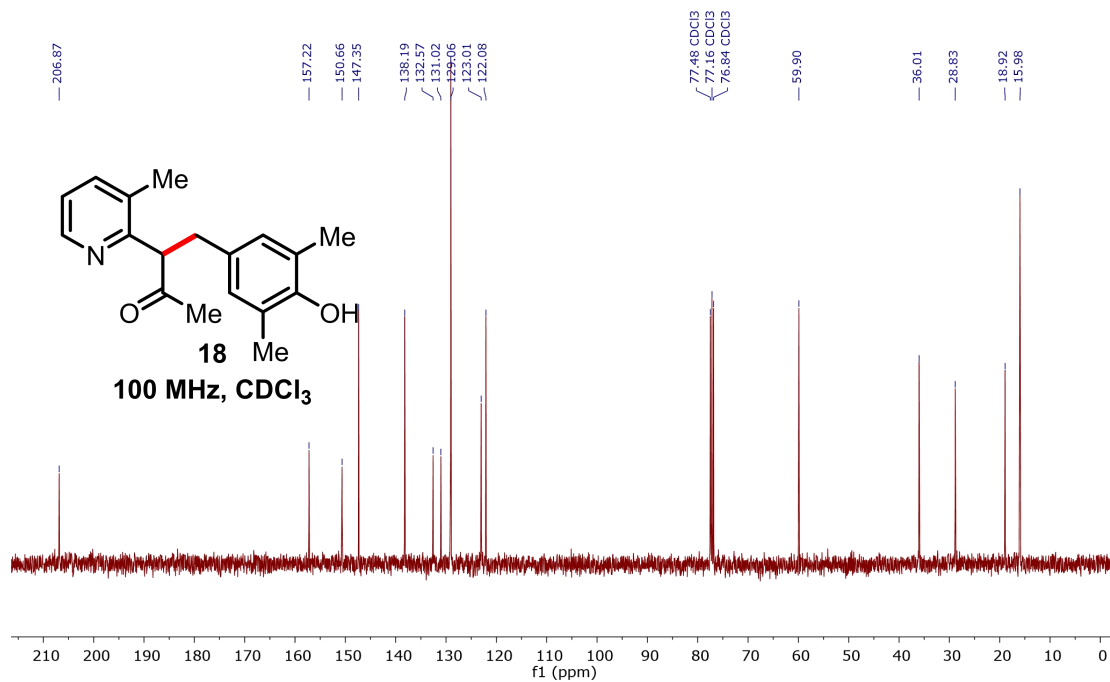

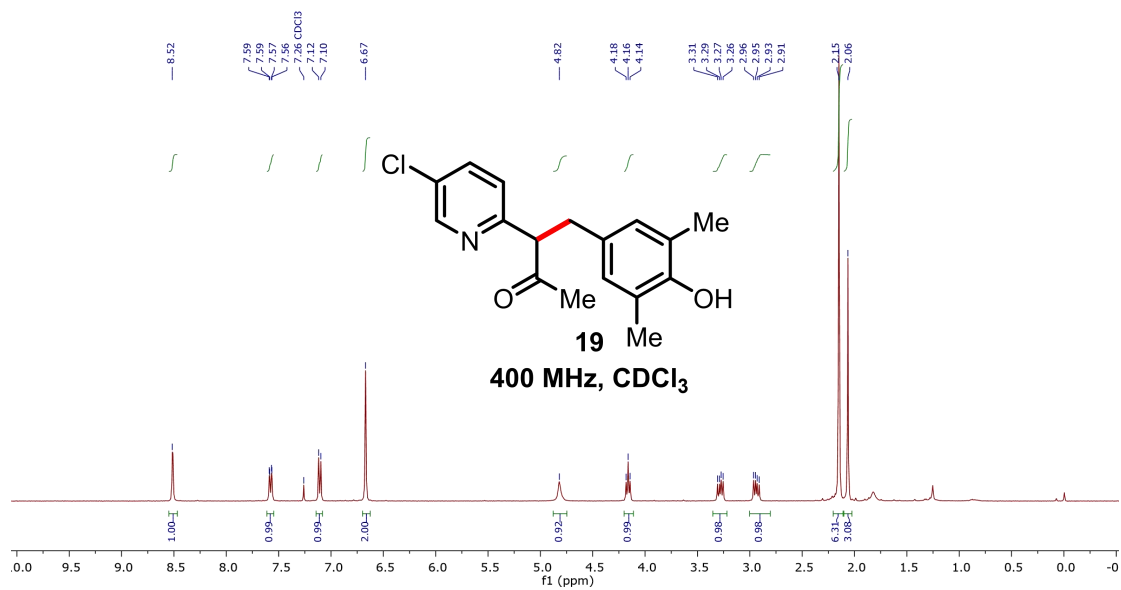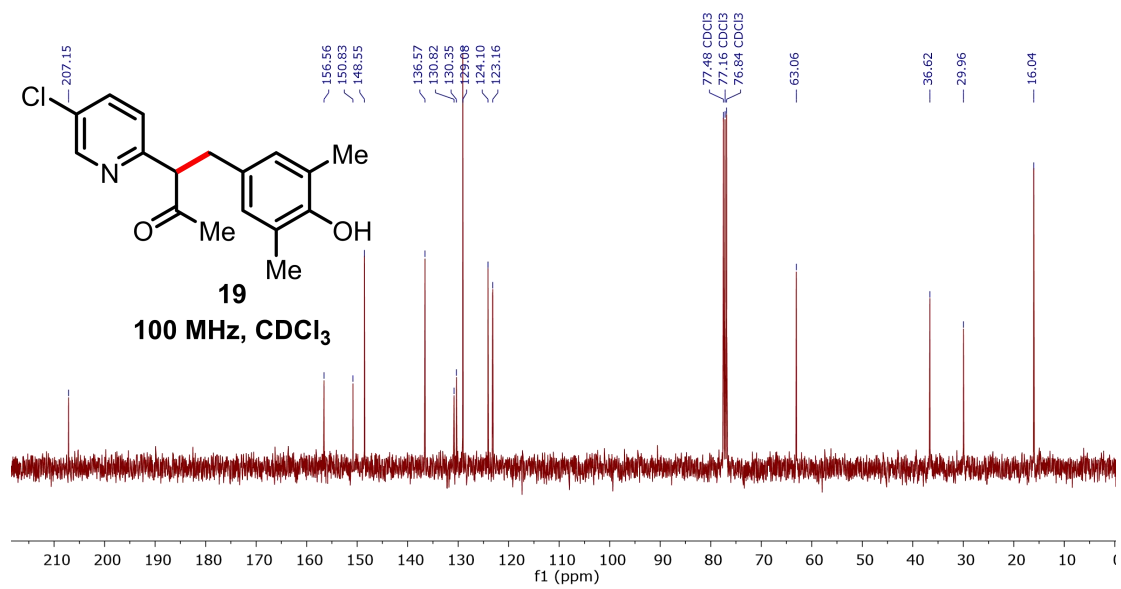

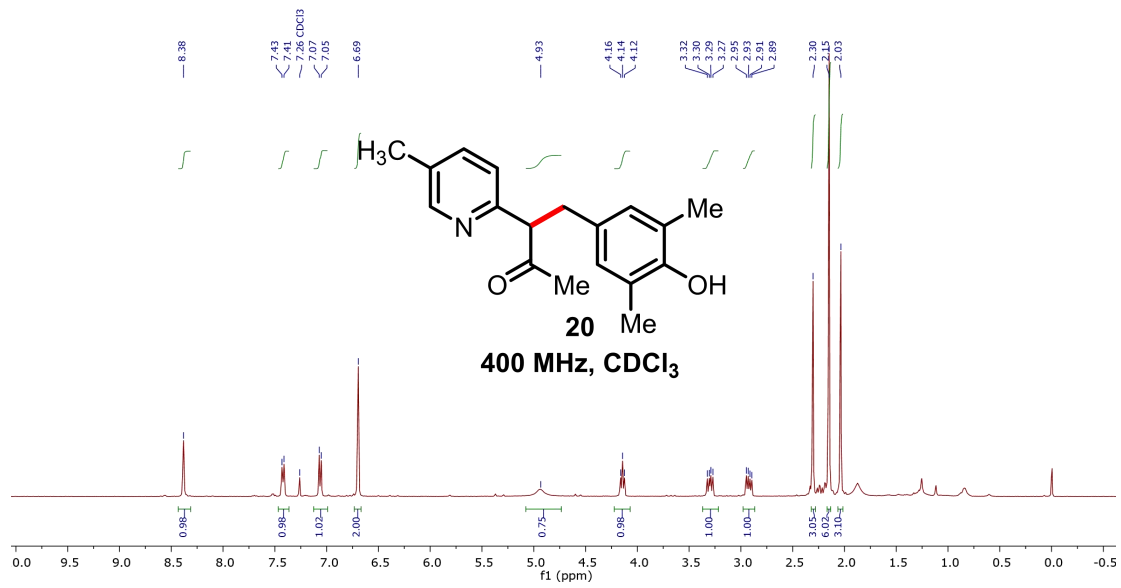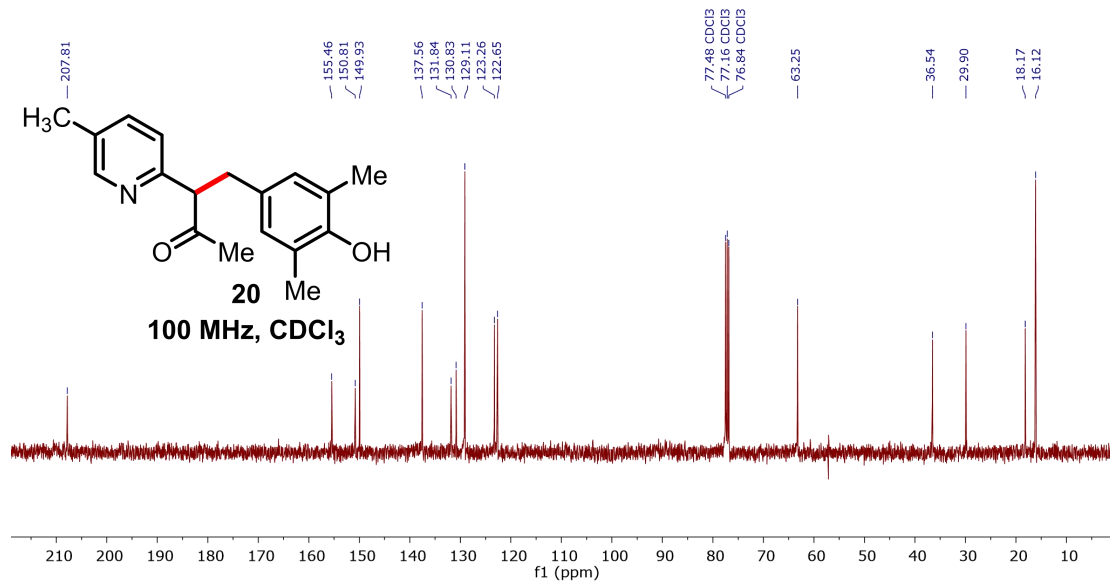

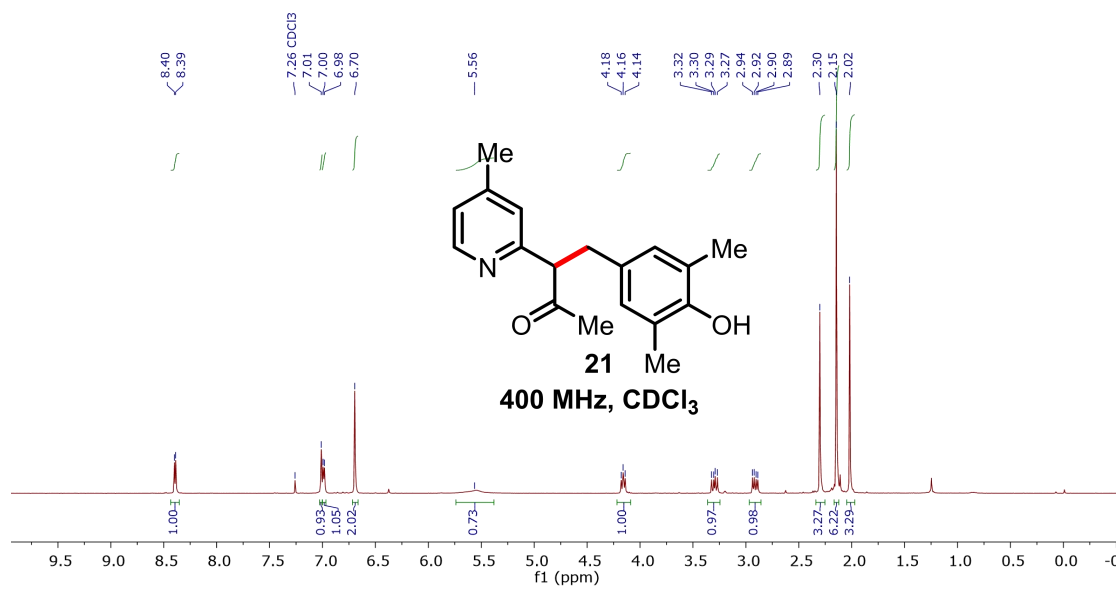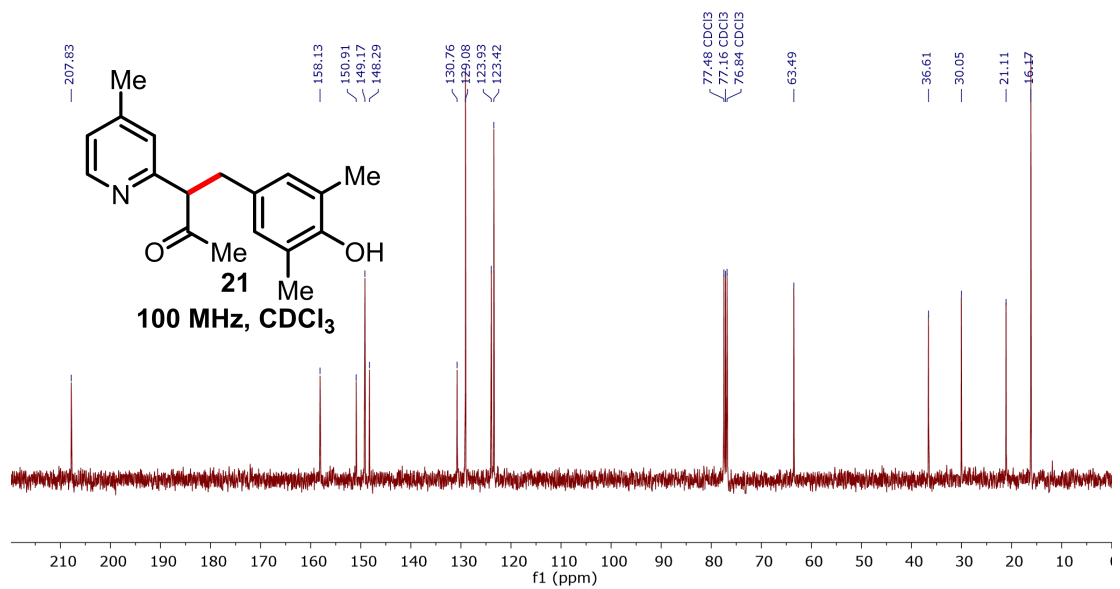

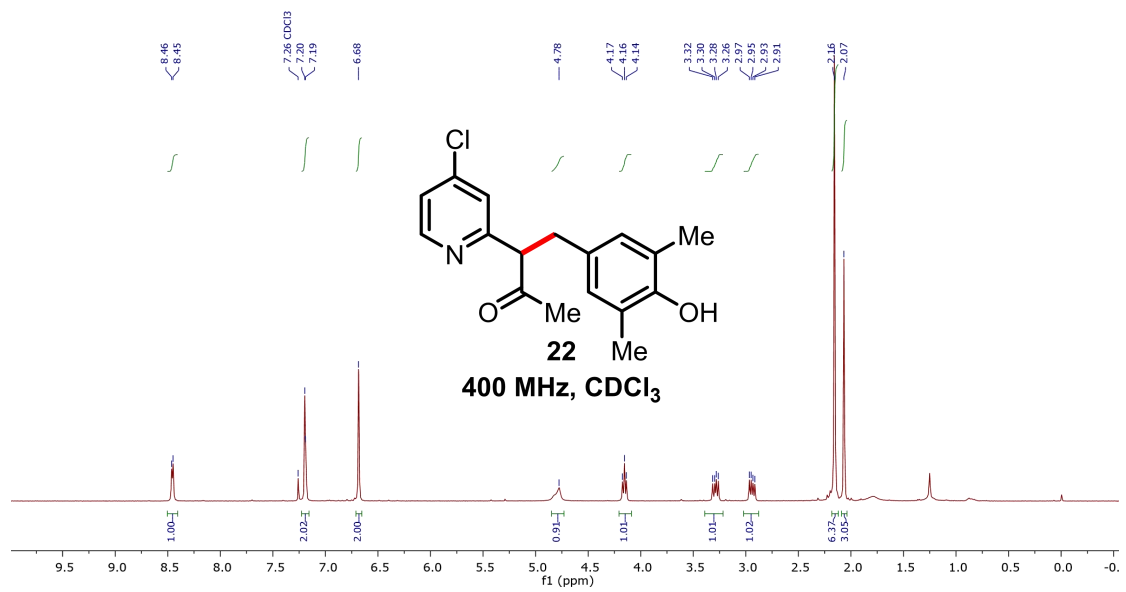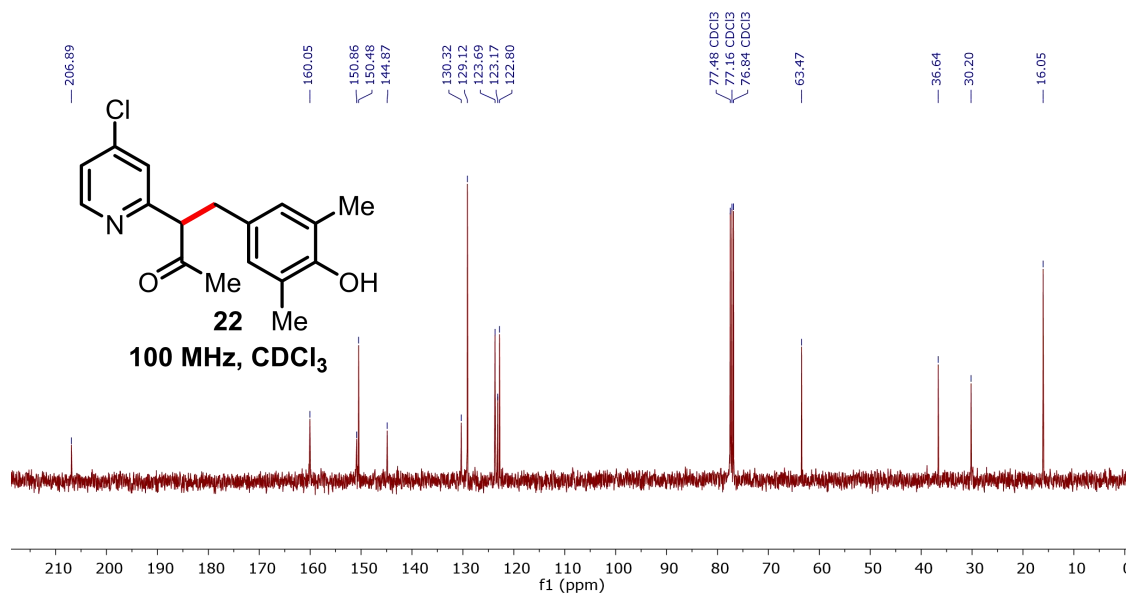



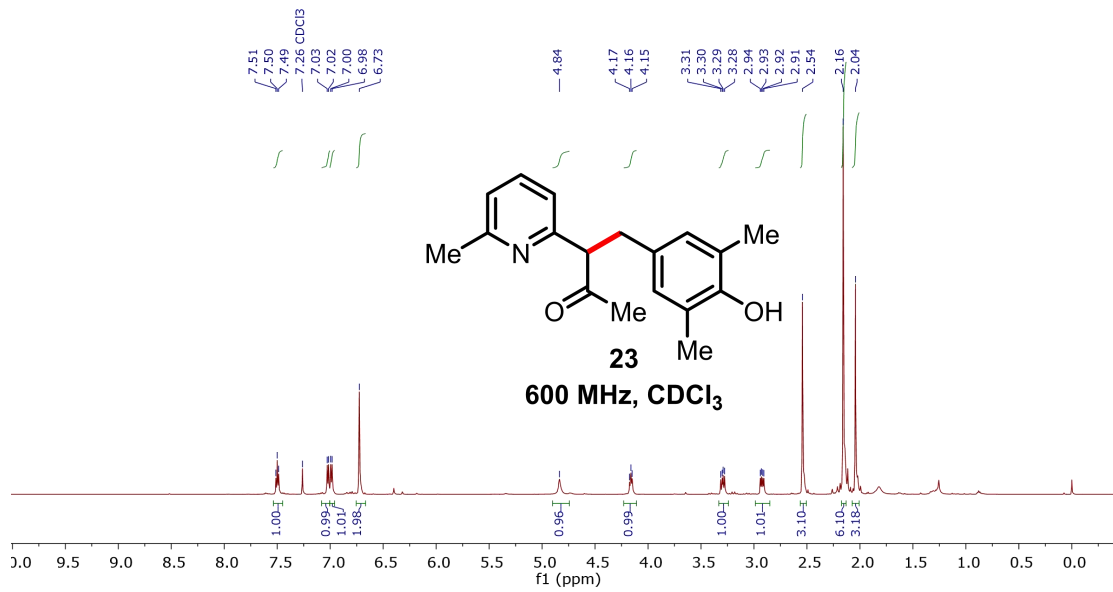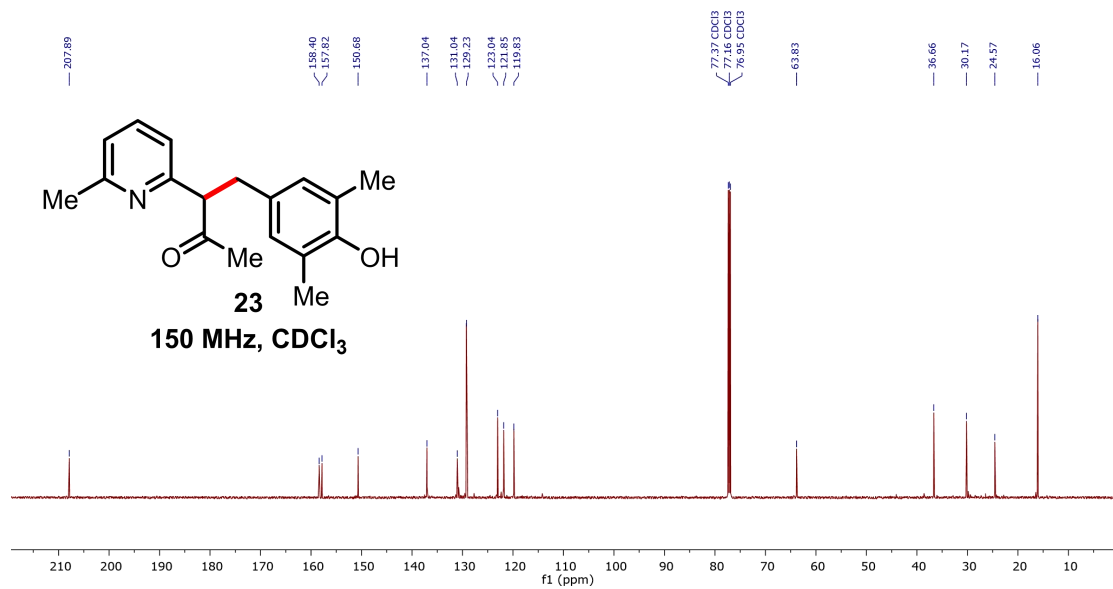

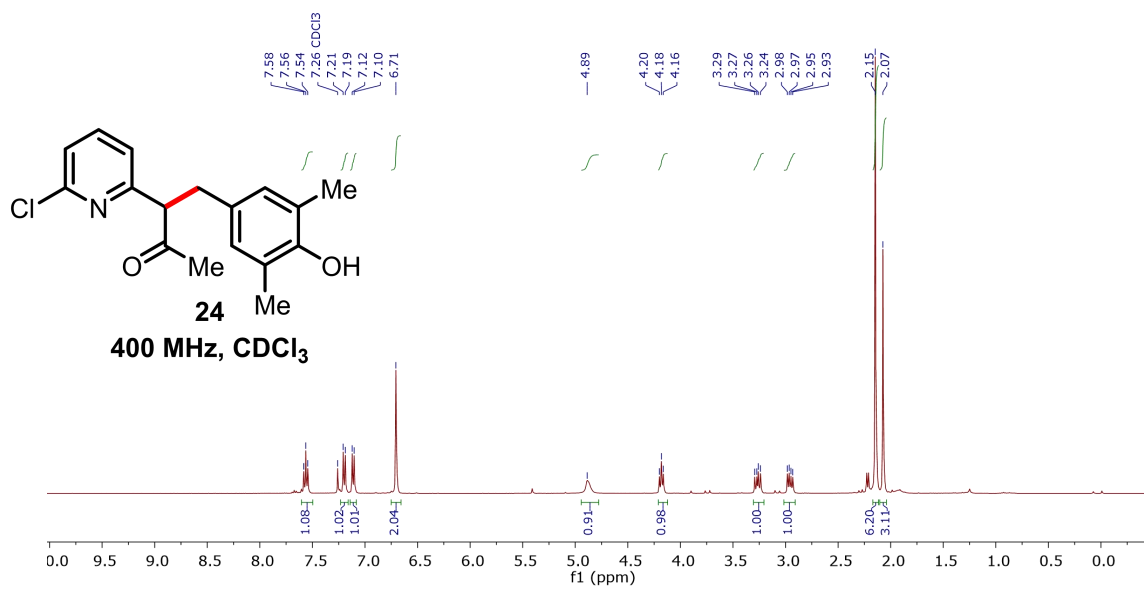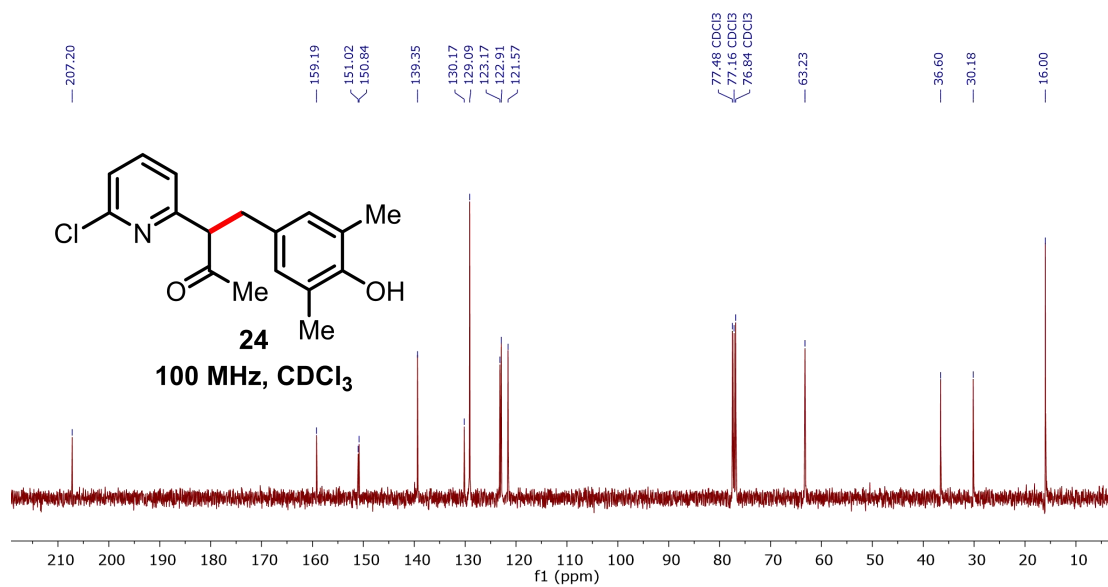

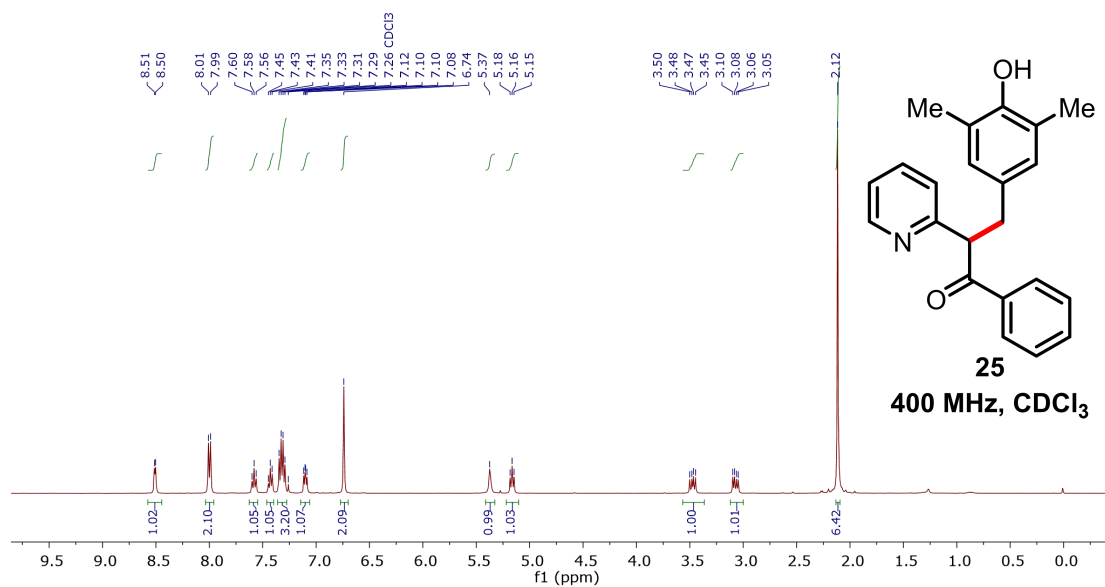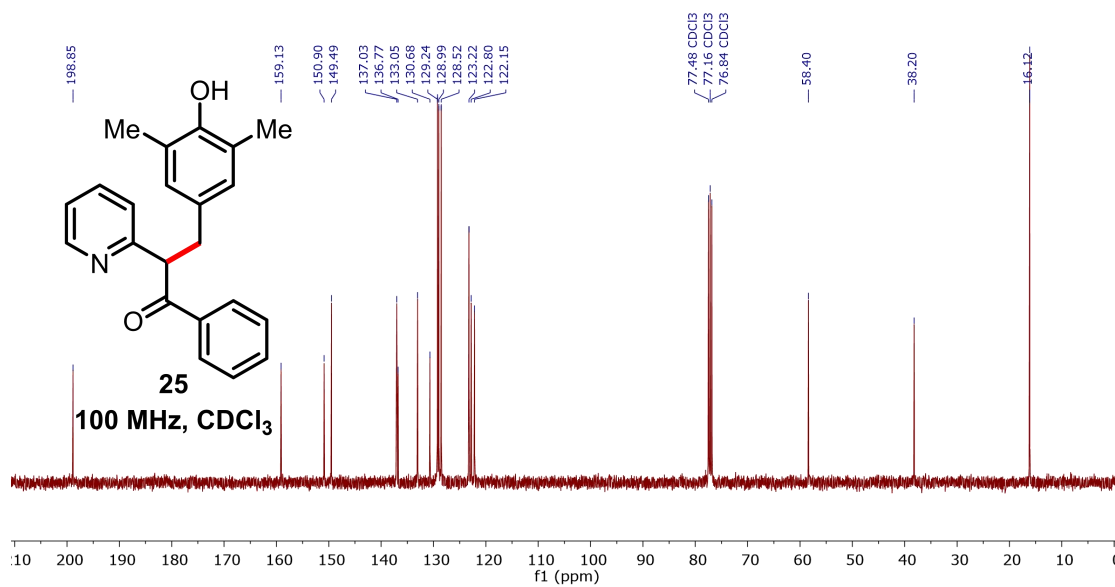

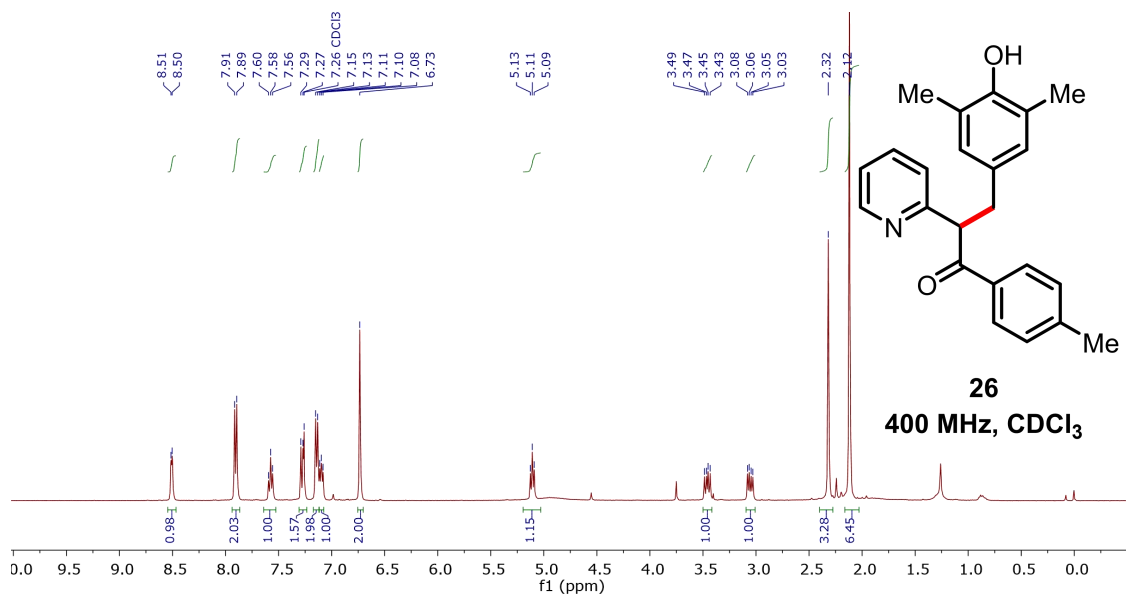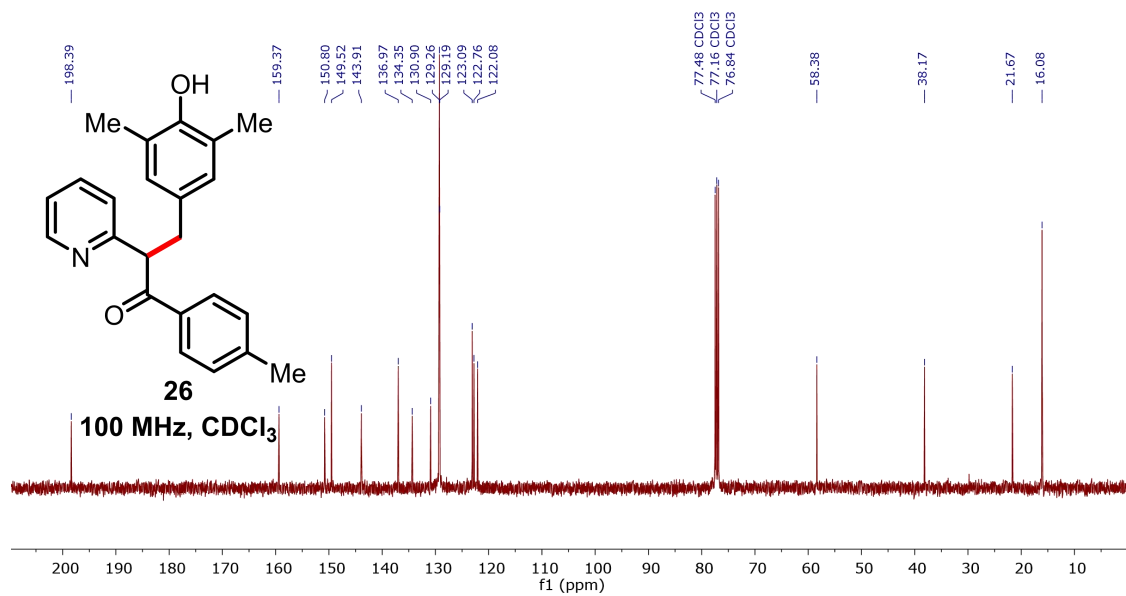

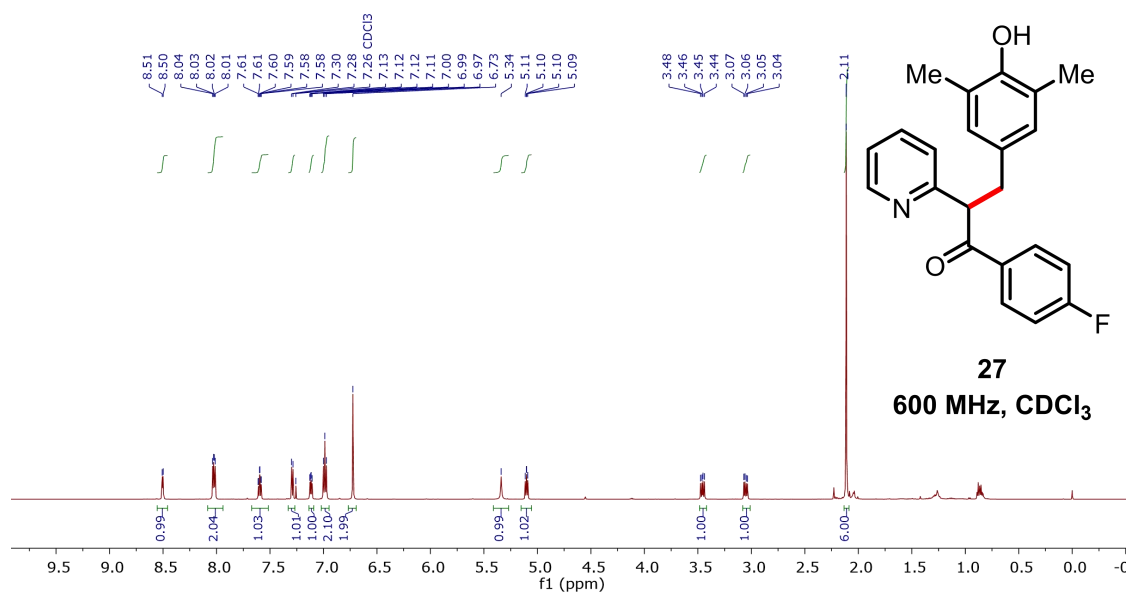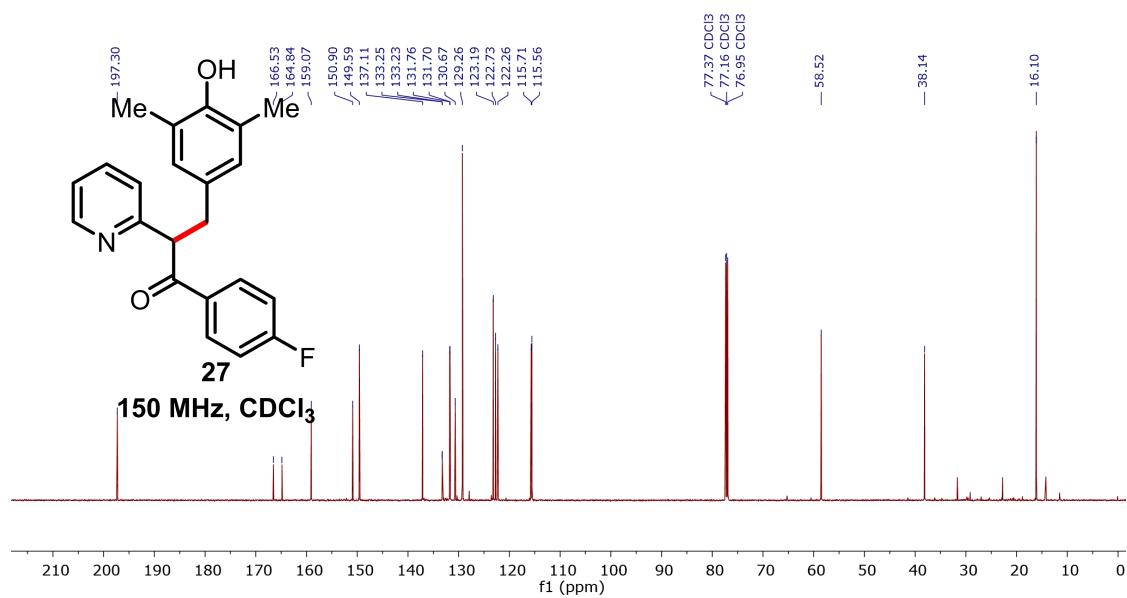

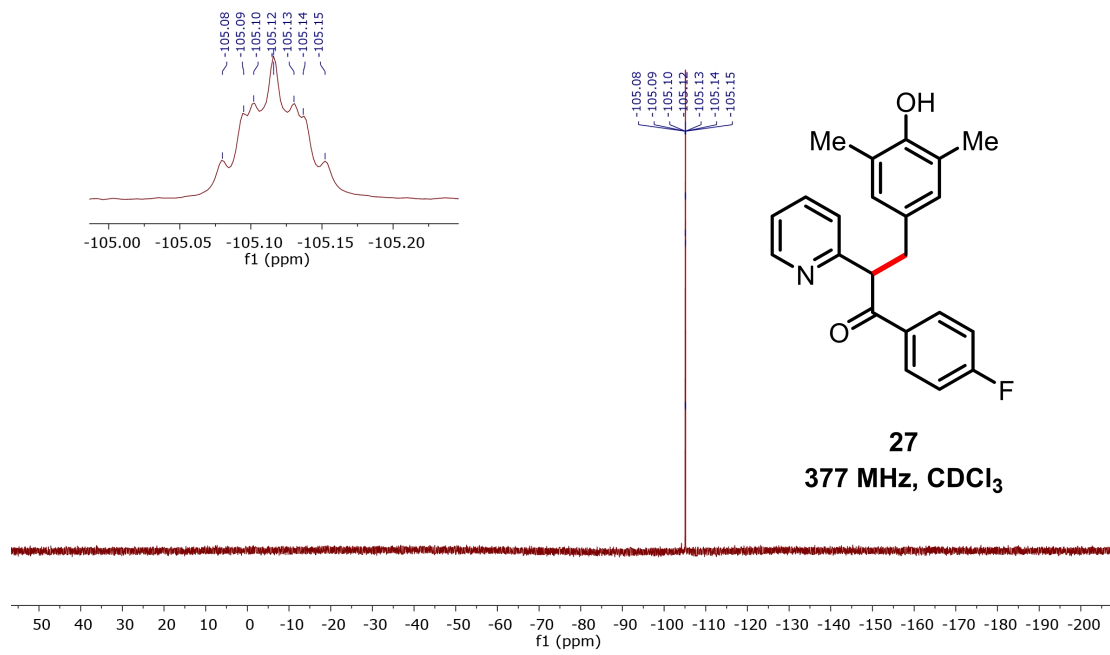

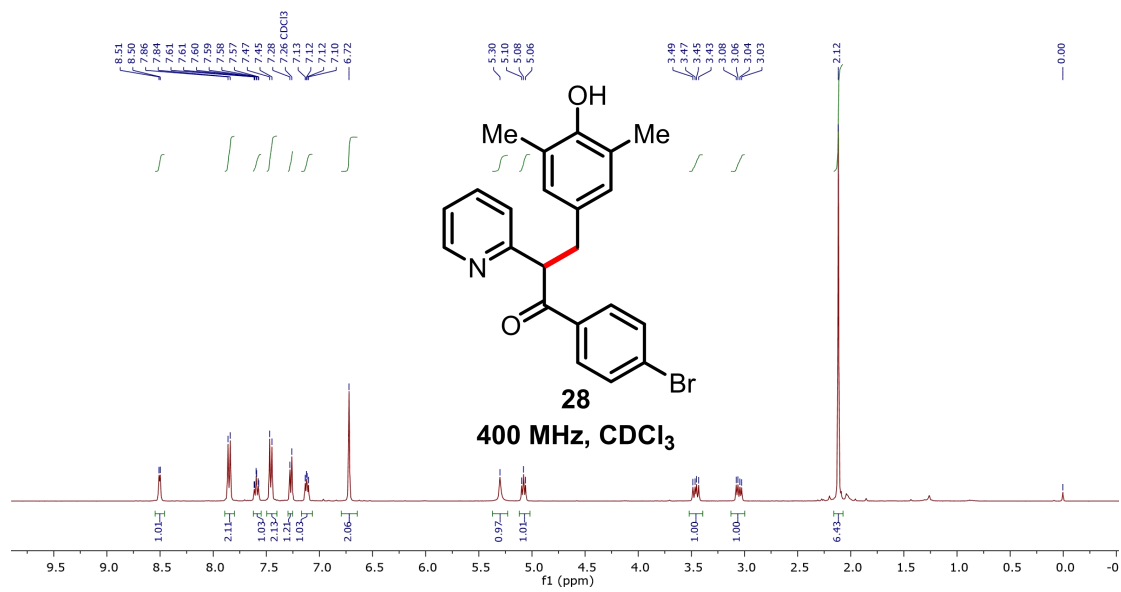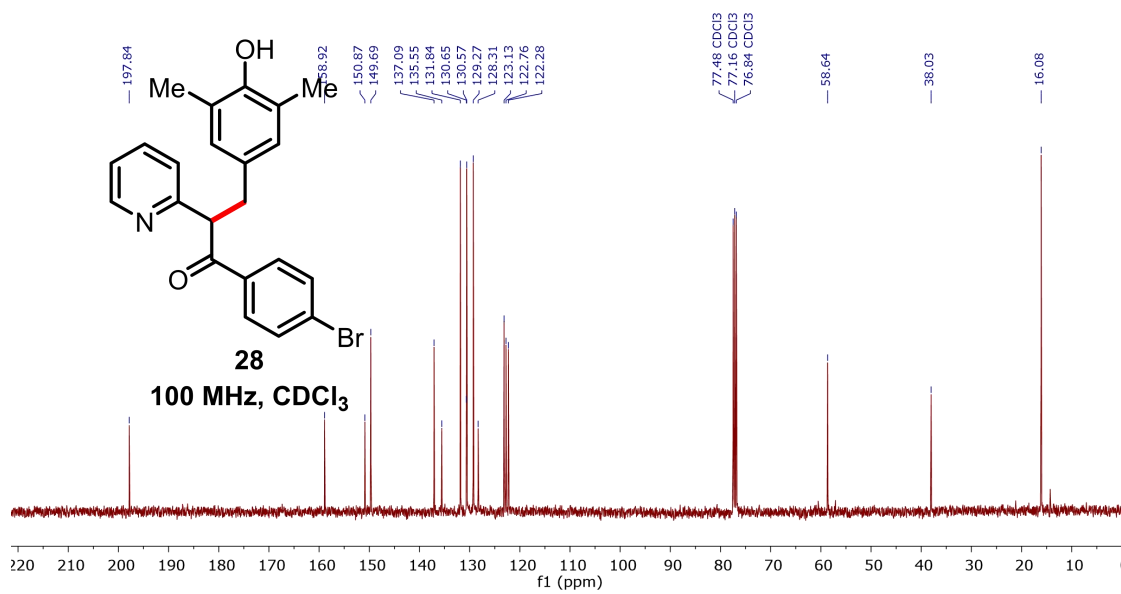

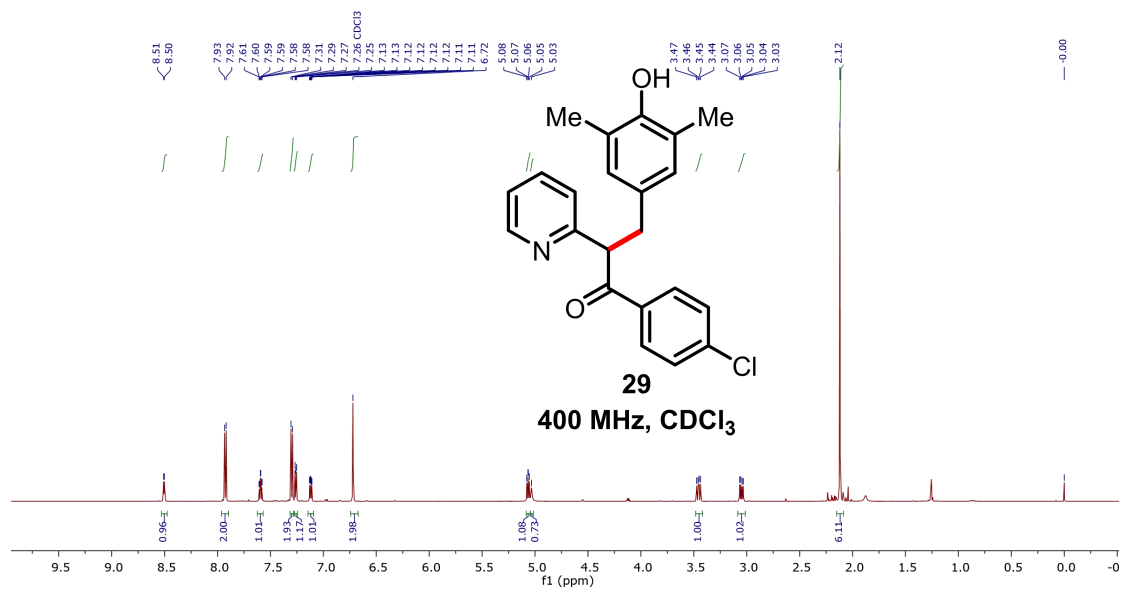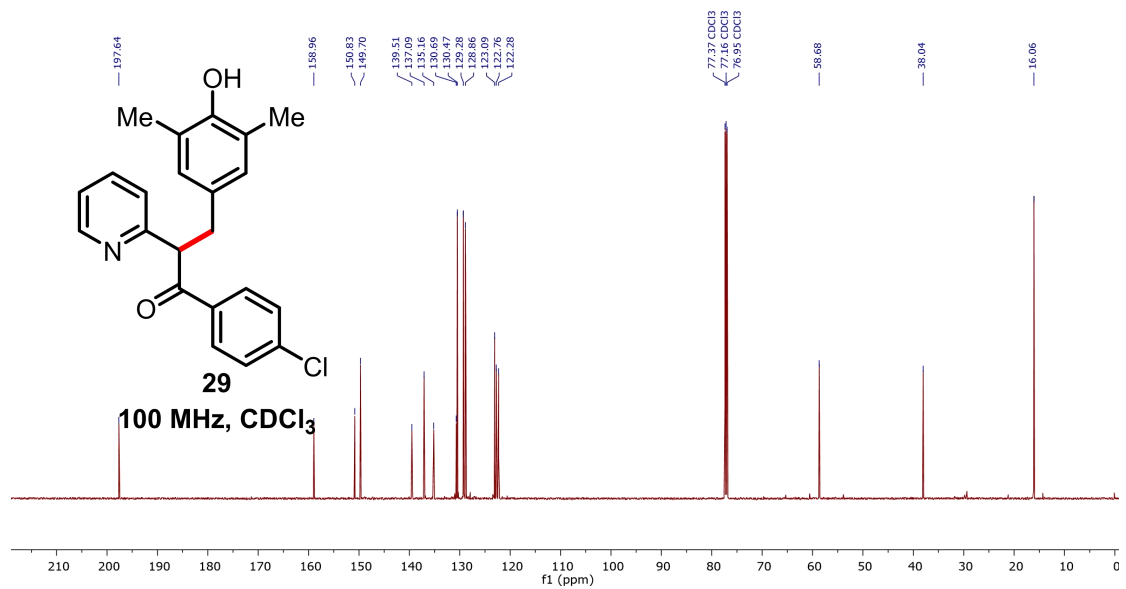



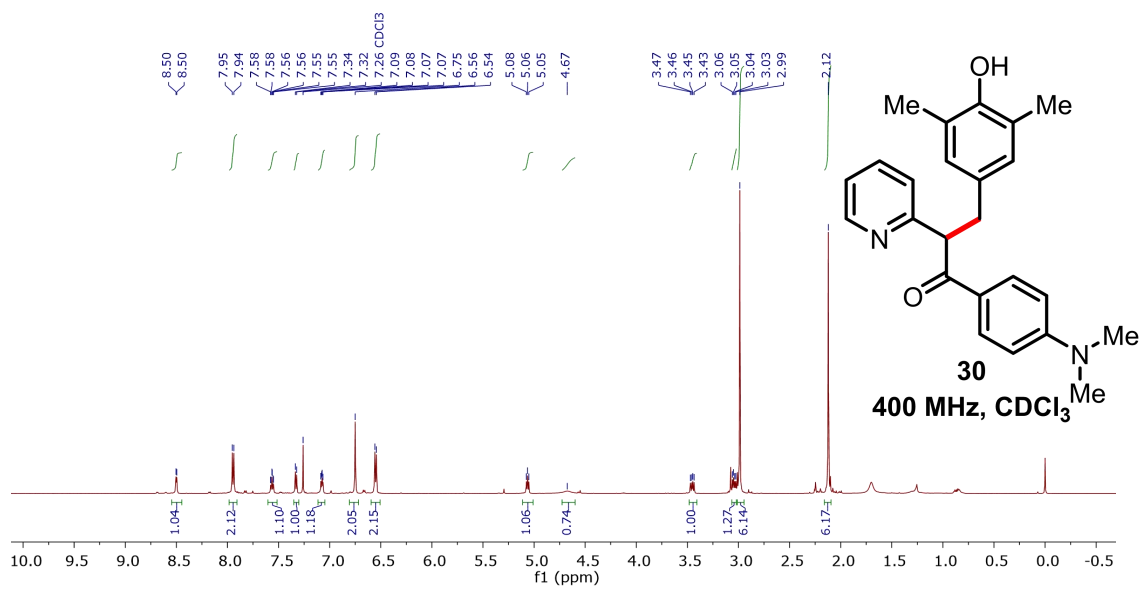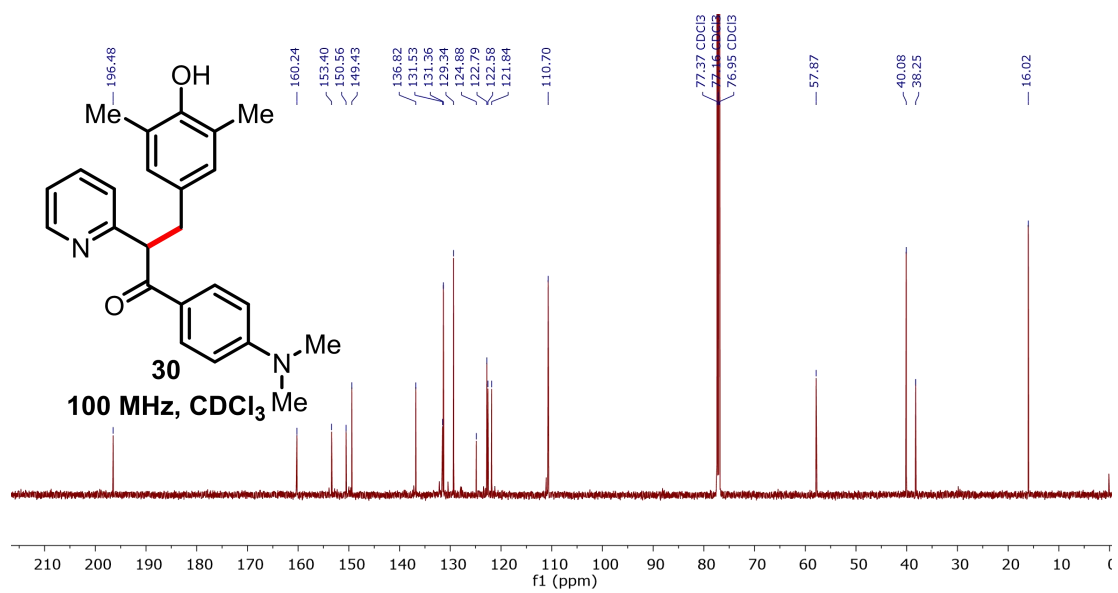

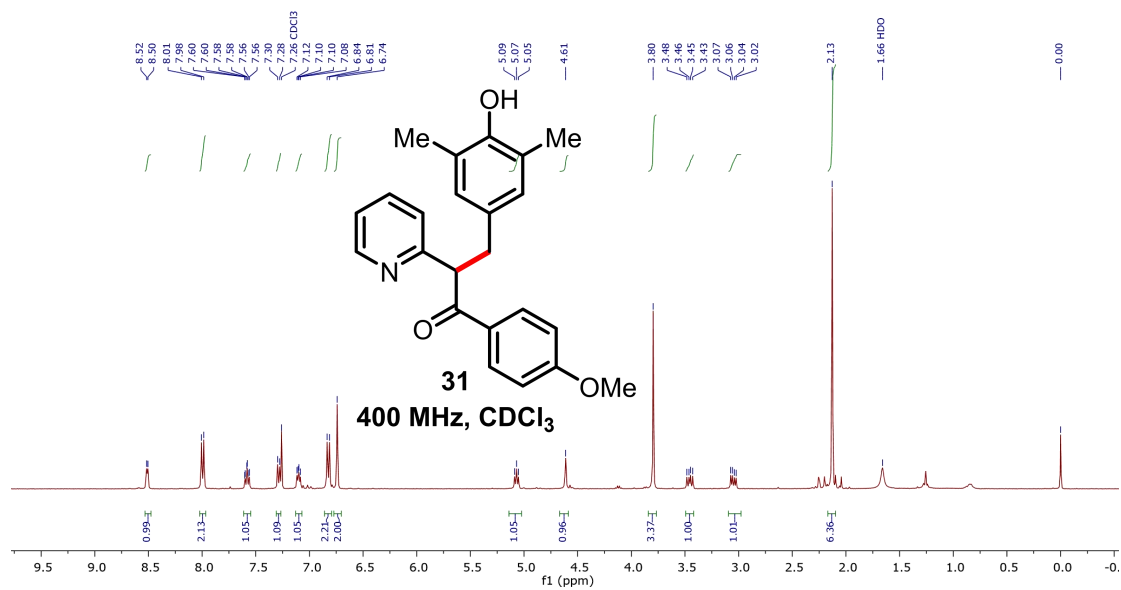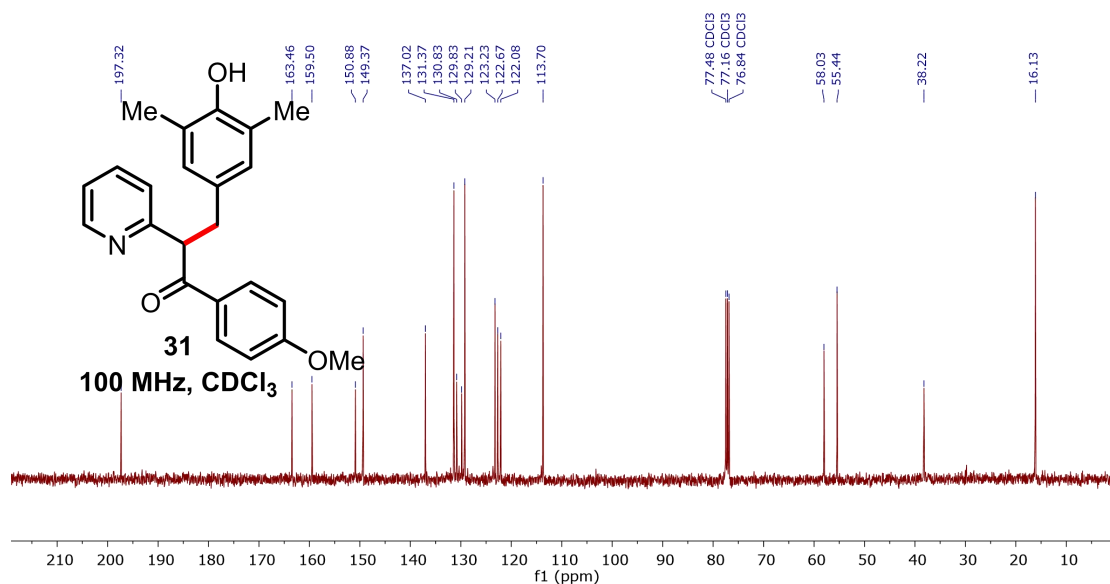

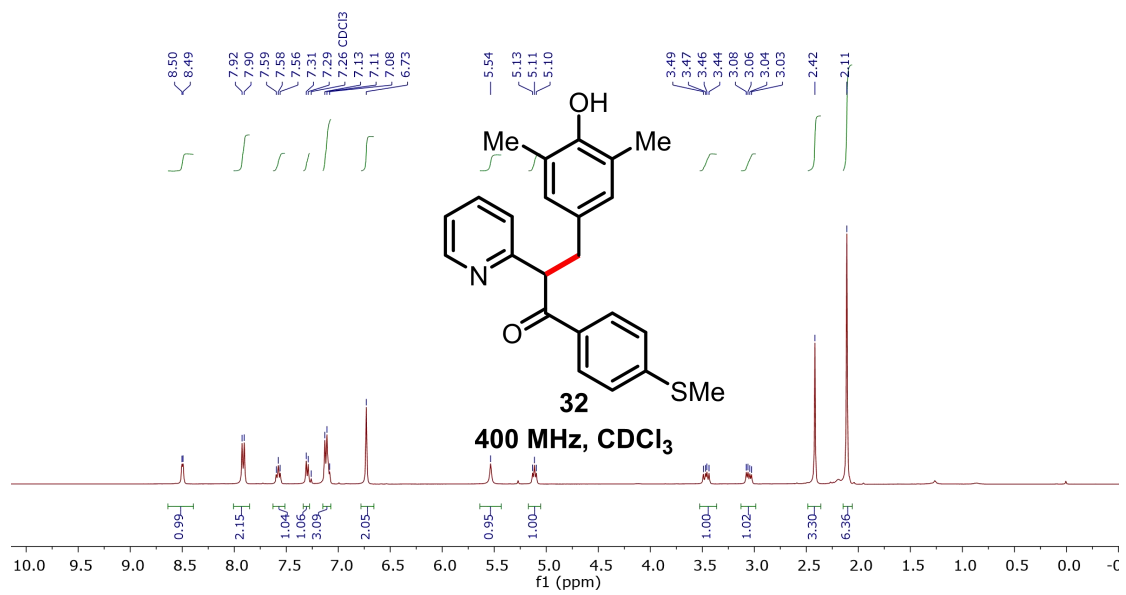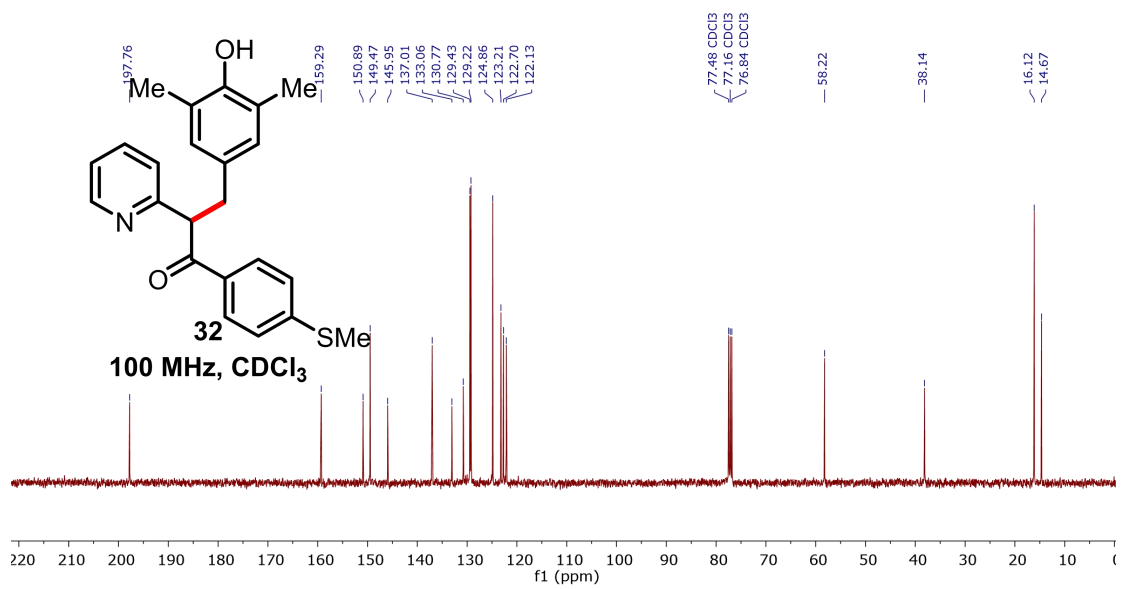

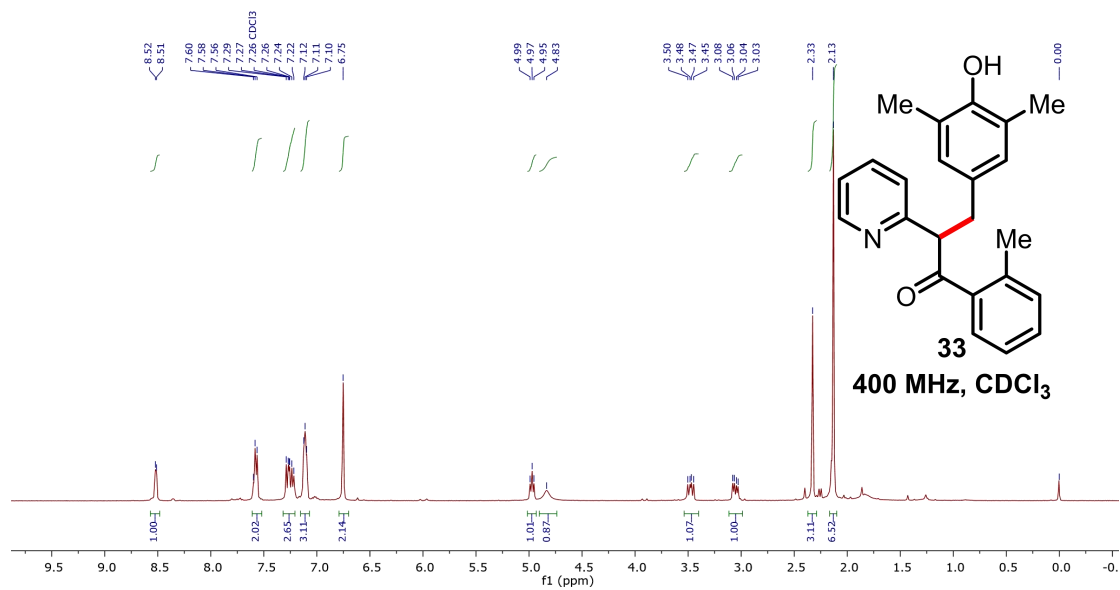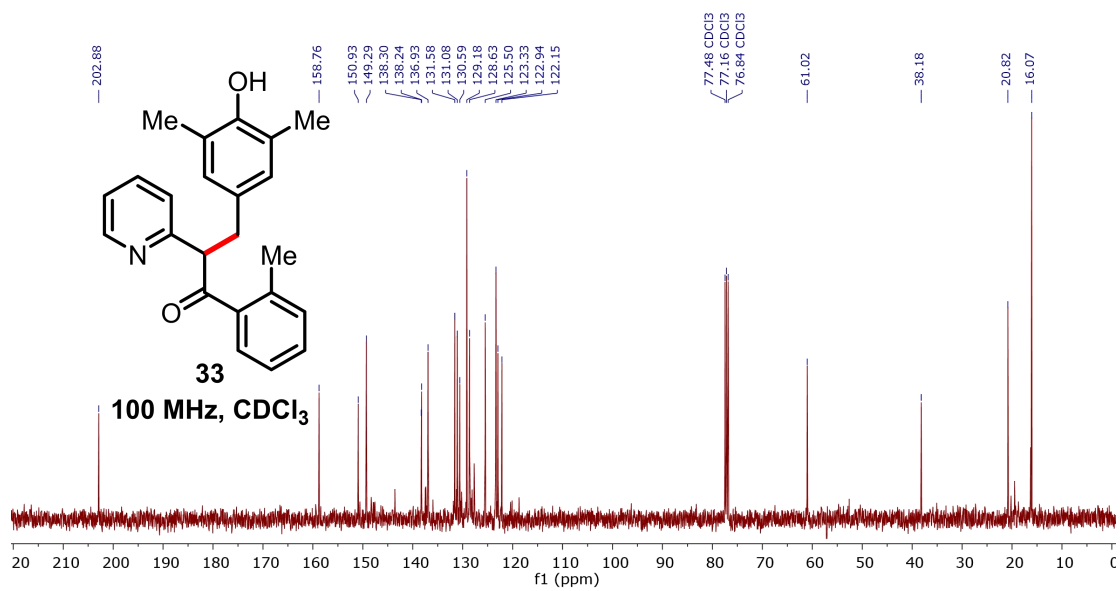

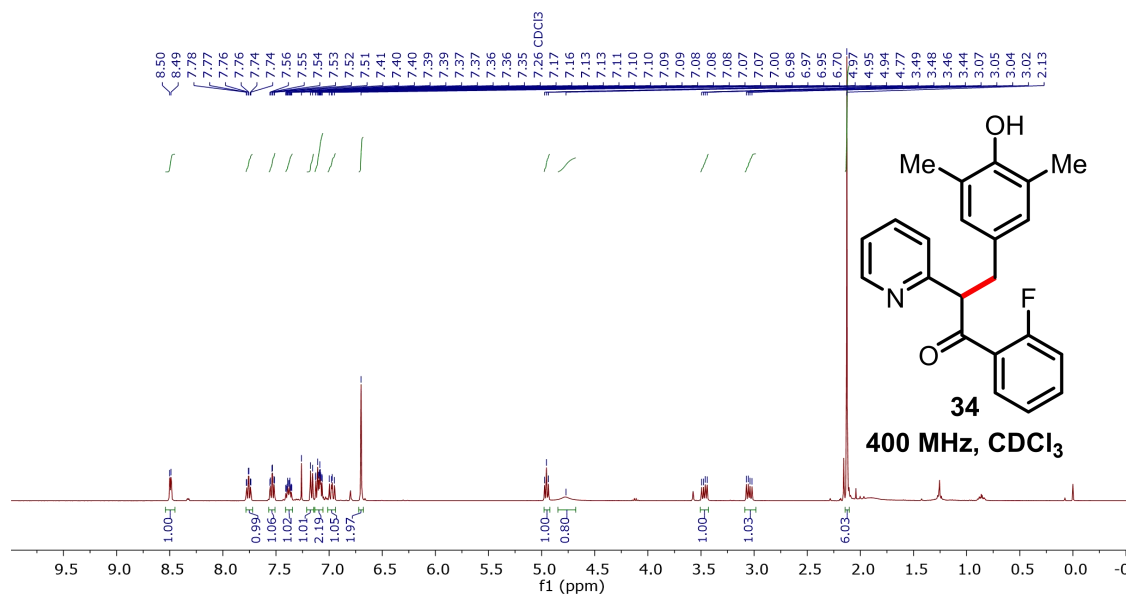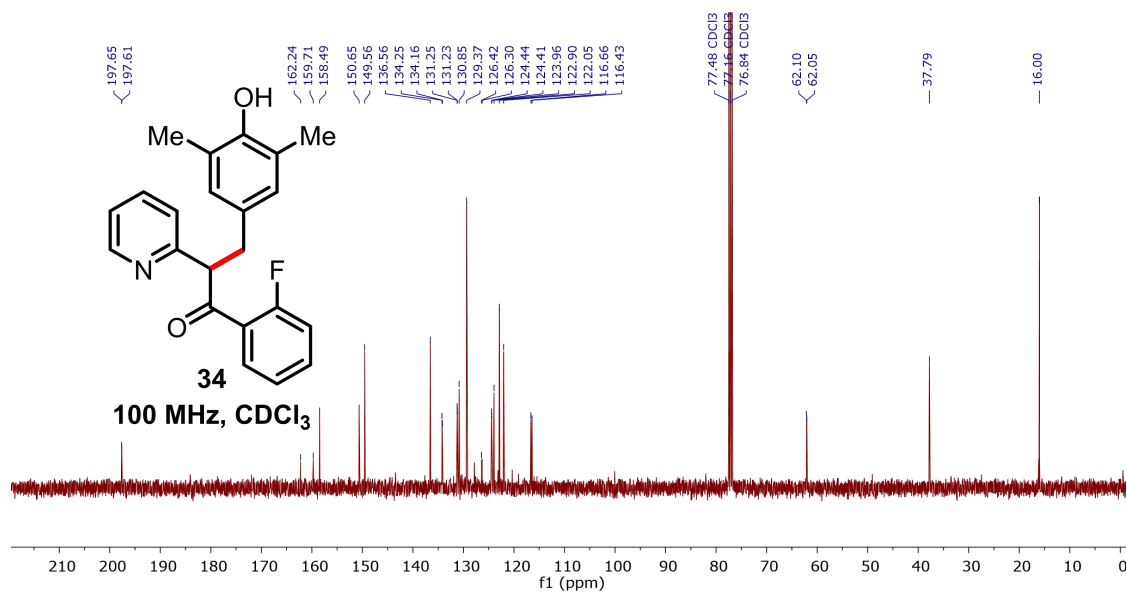

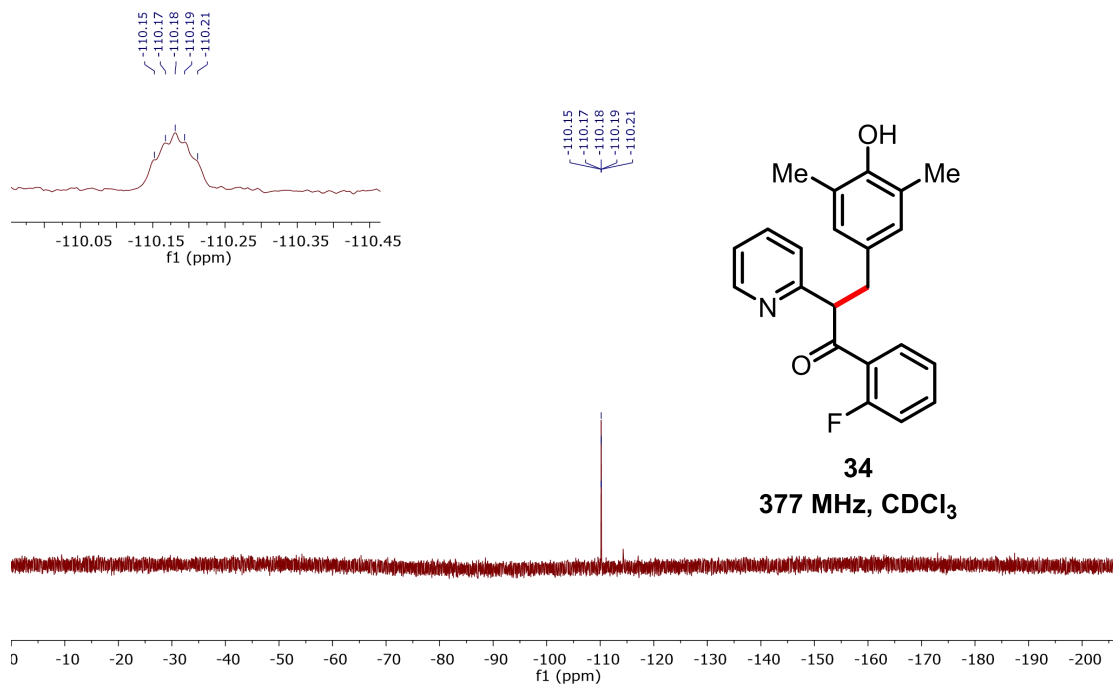

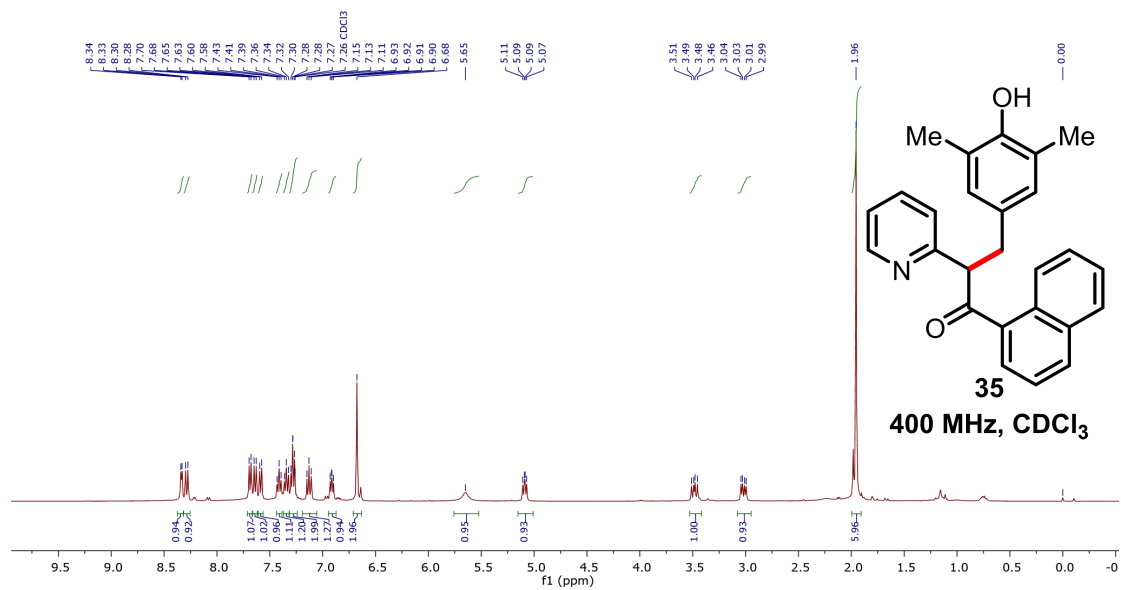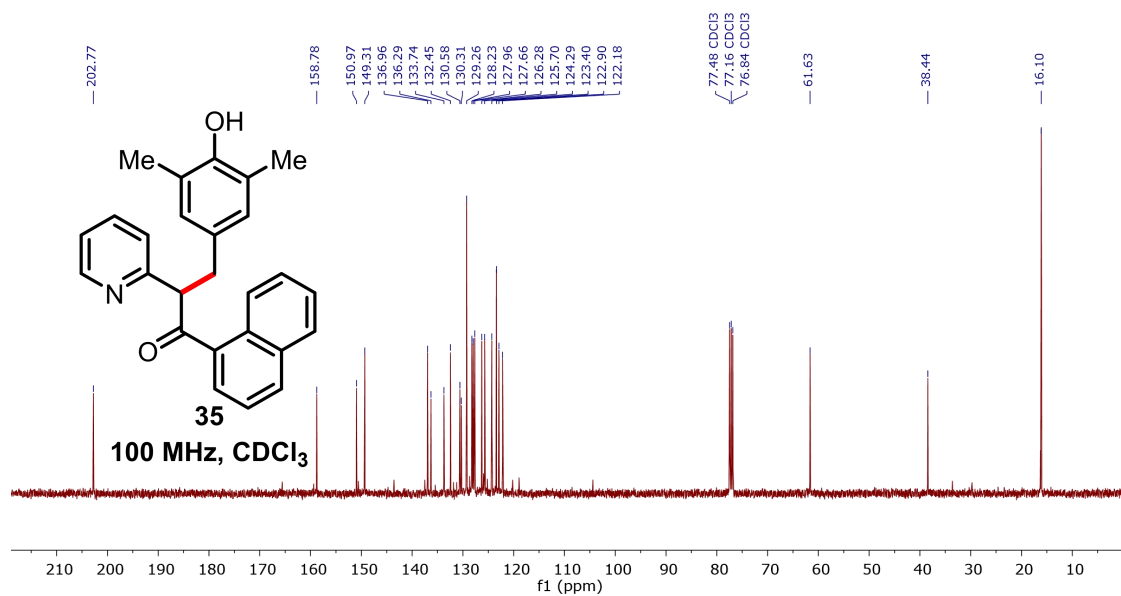

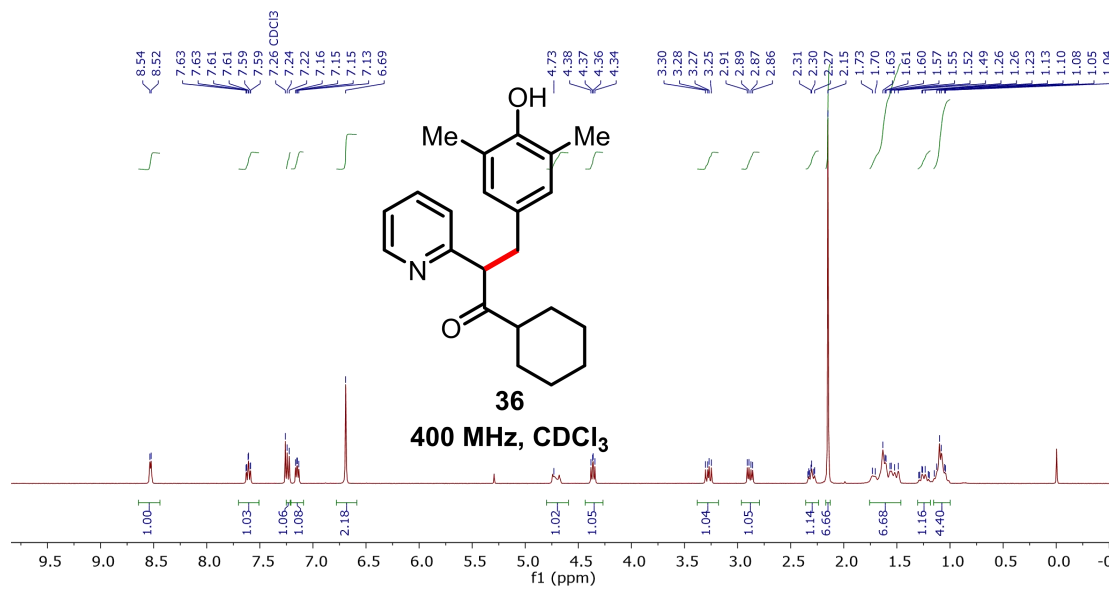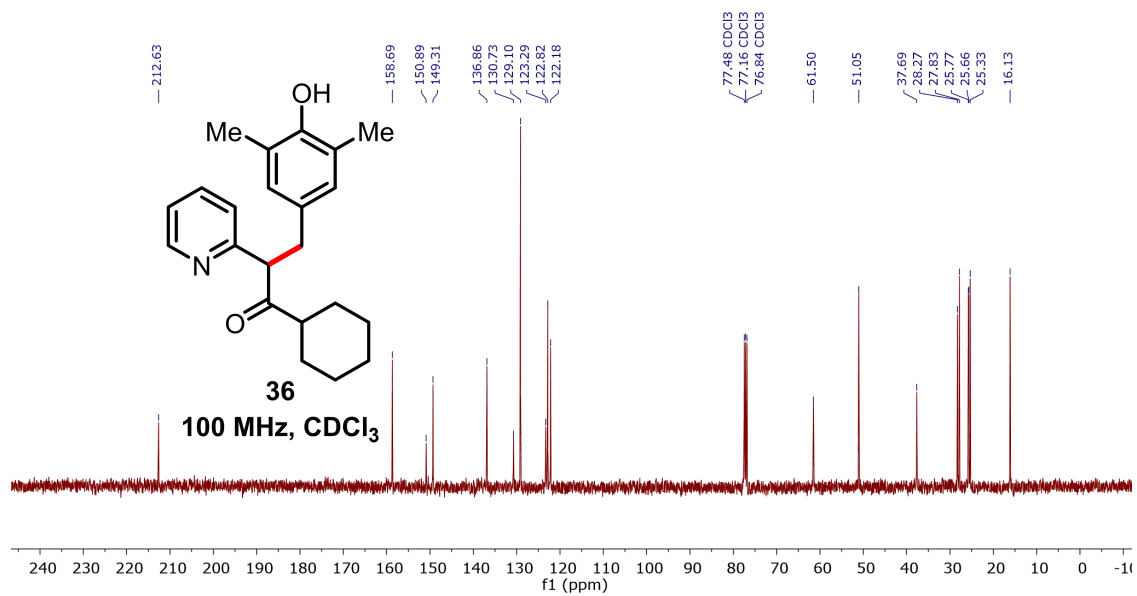



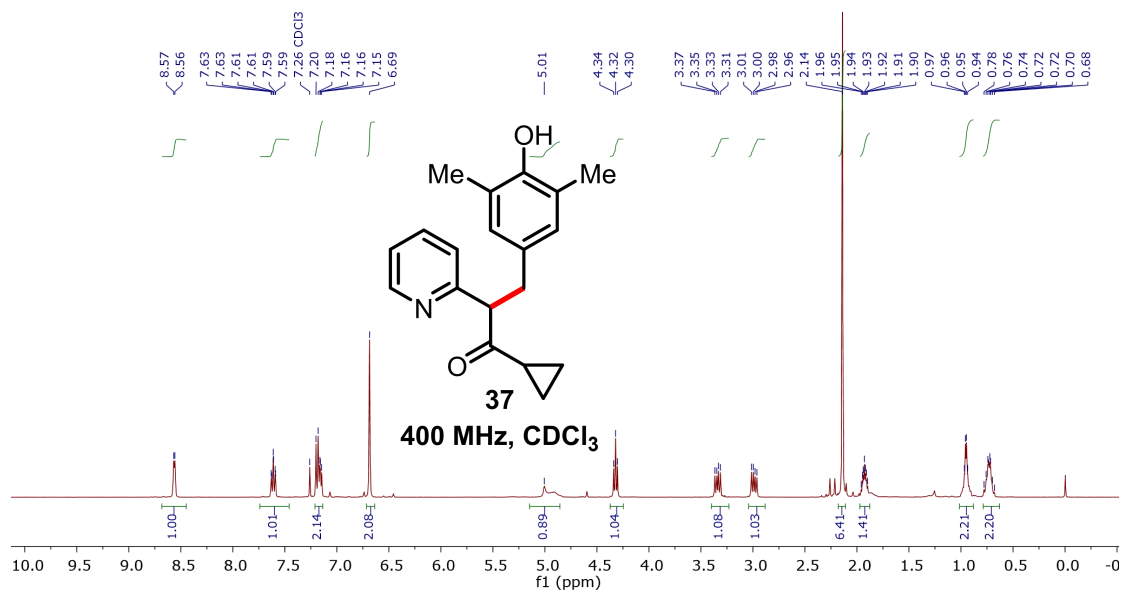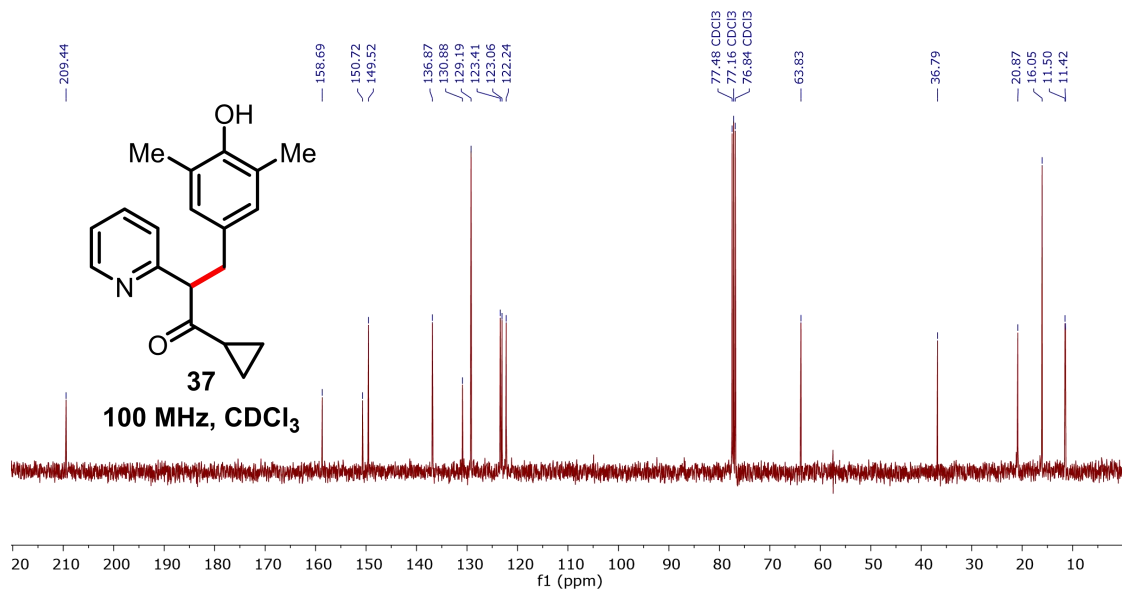

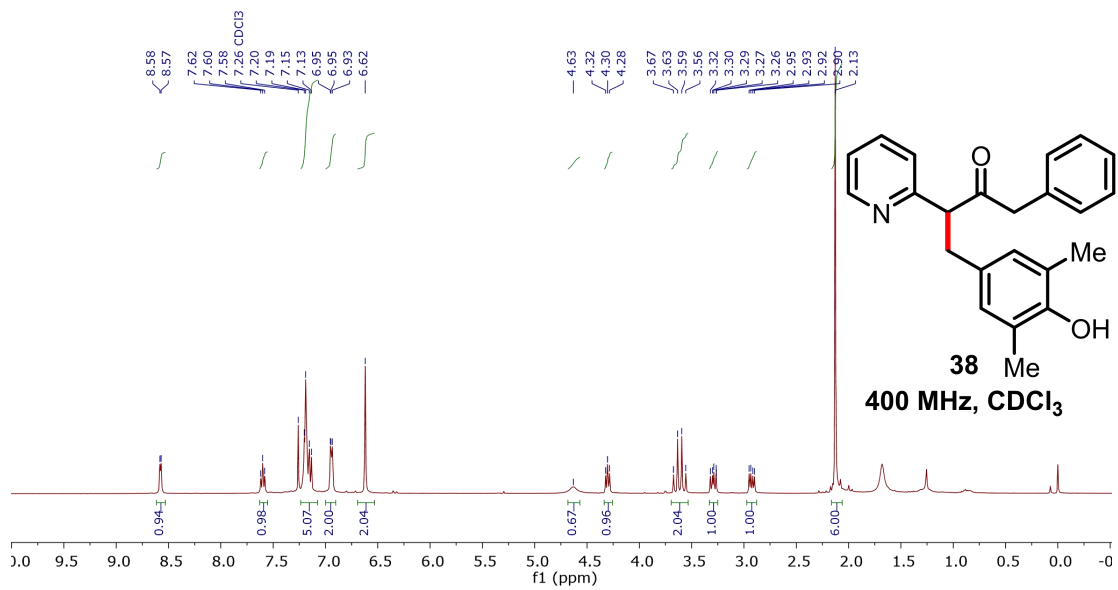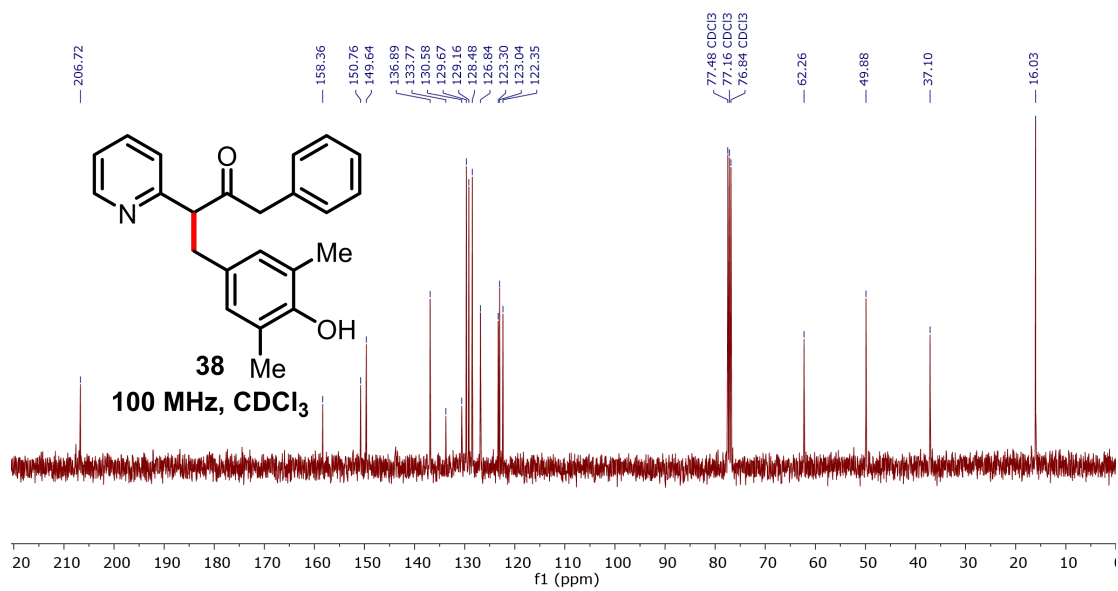

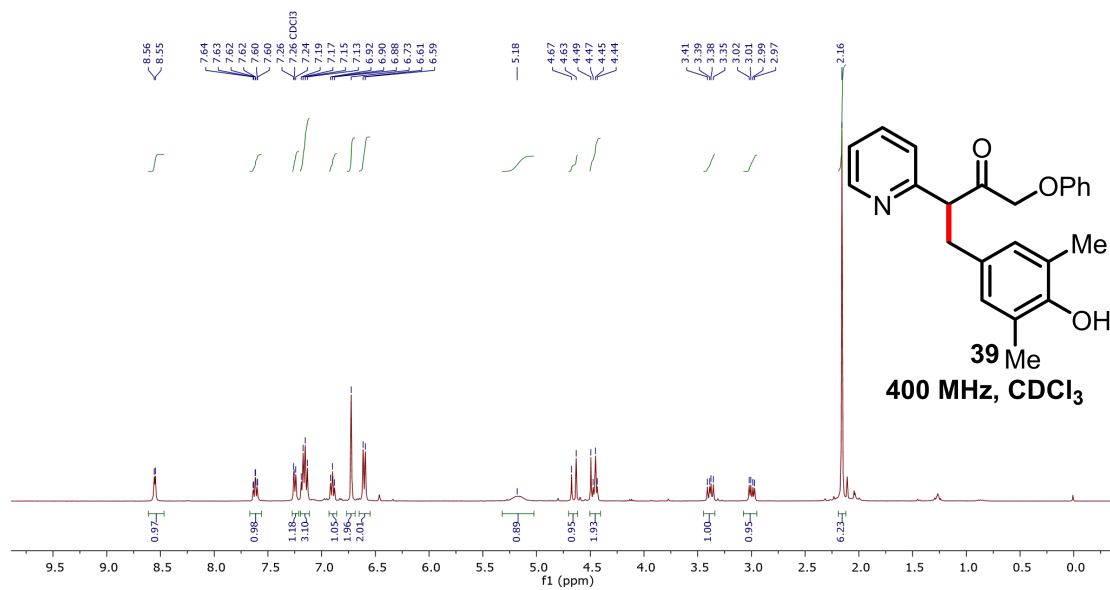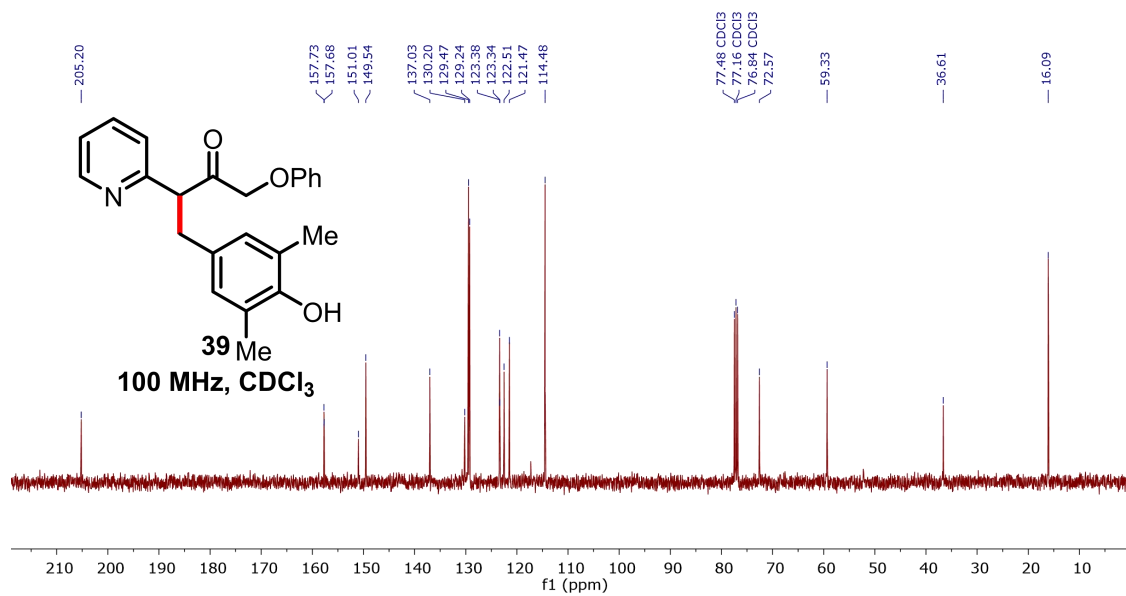

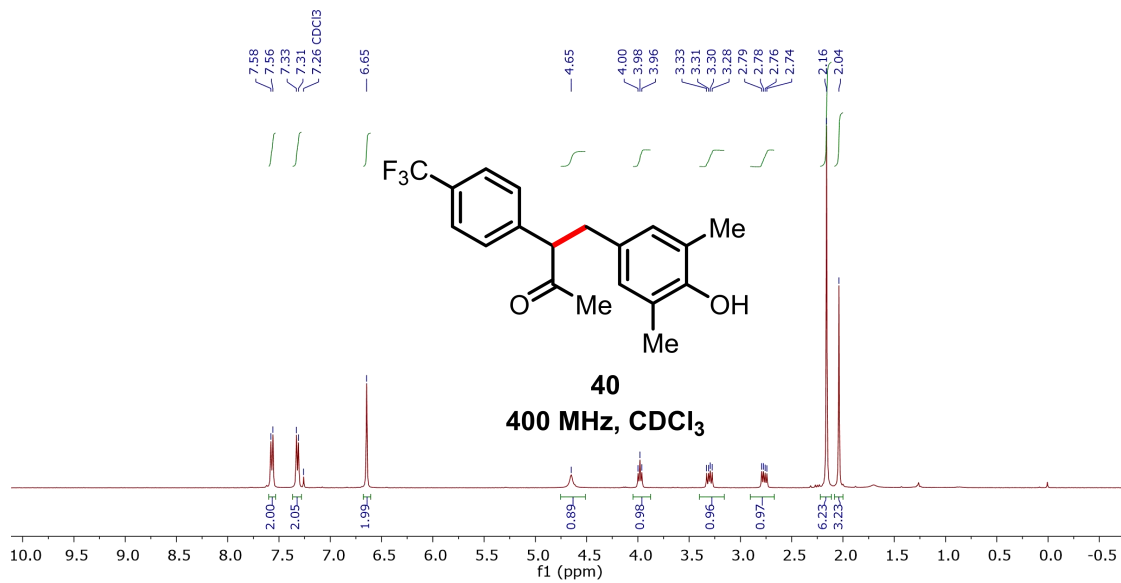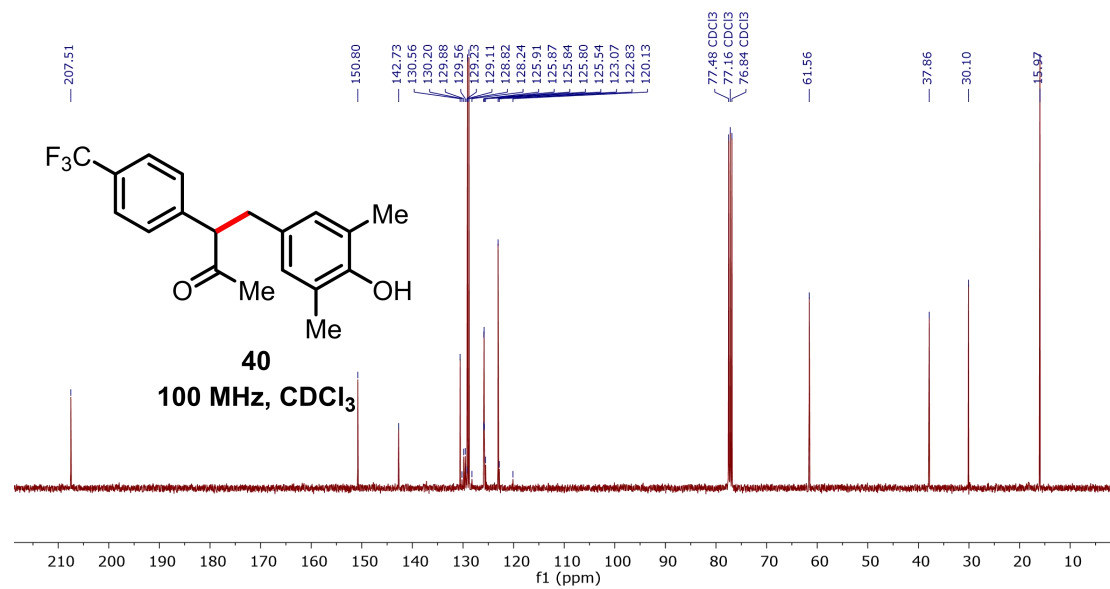

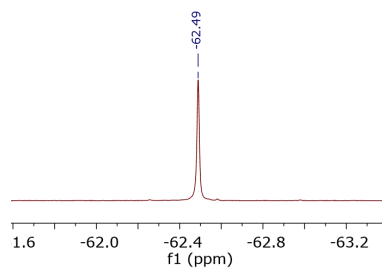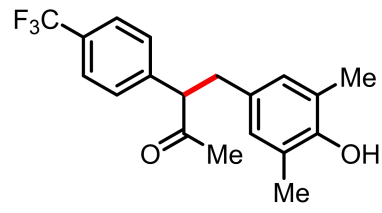

**40**  
**377 MHz, CDCl<sub>3</sub>**

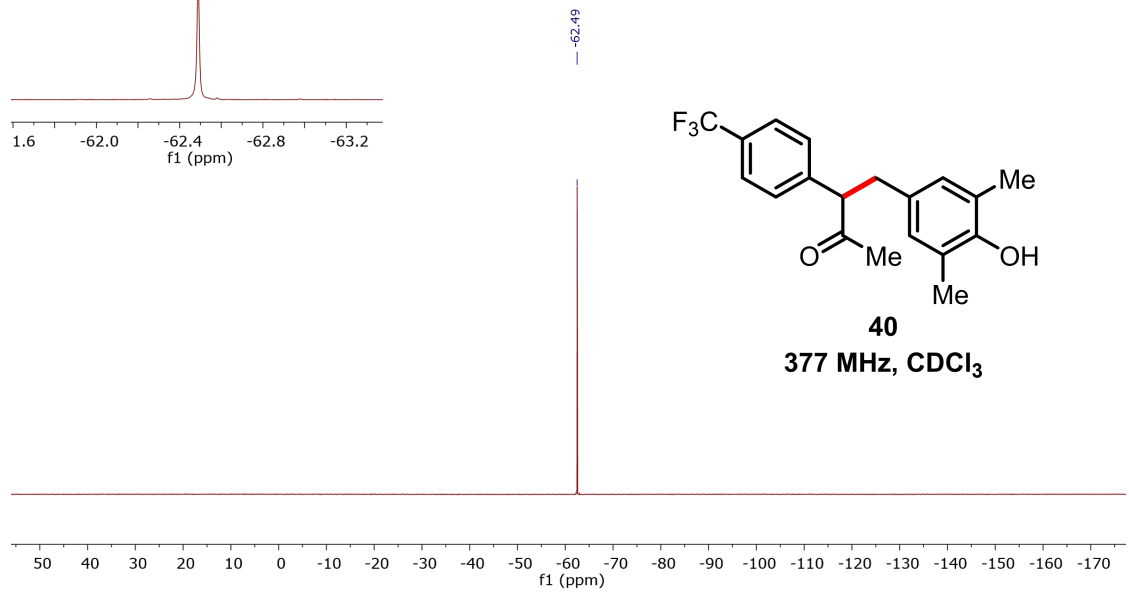

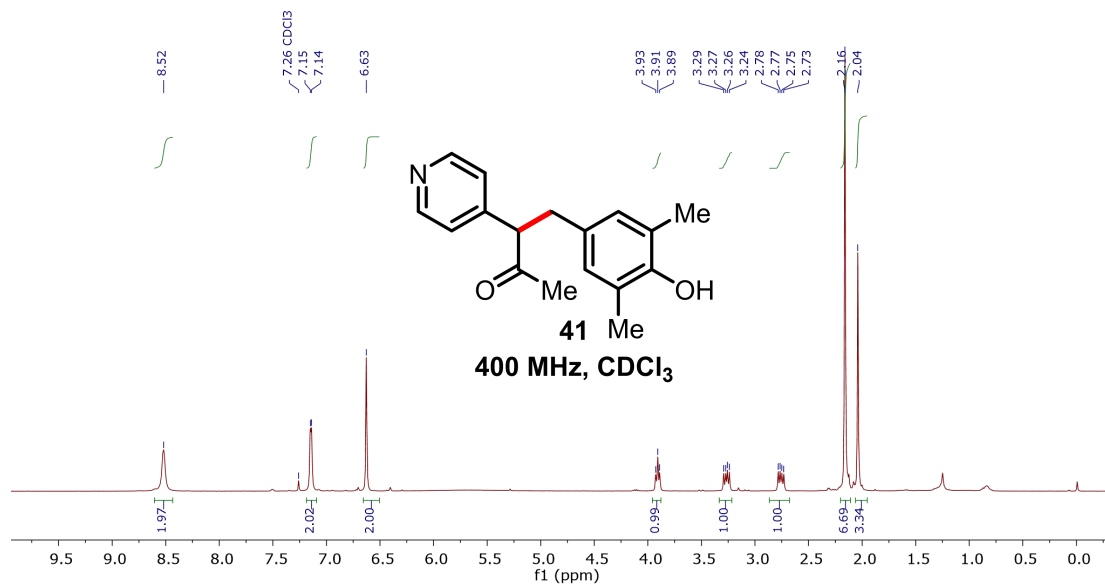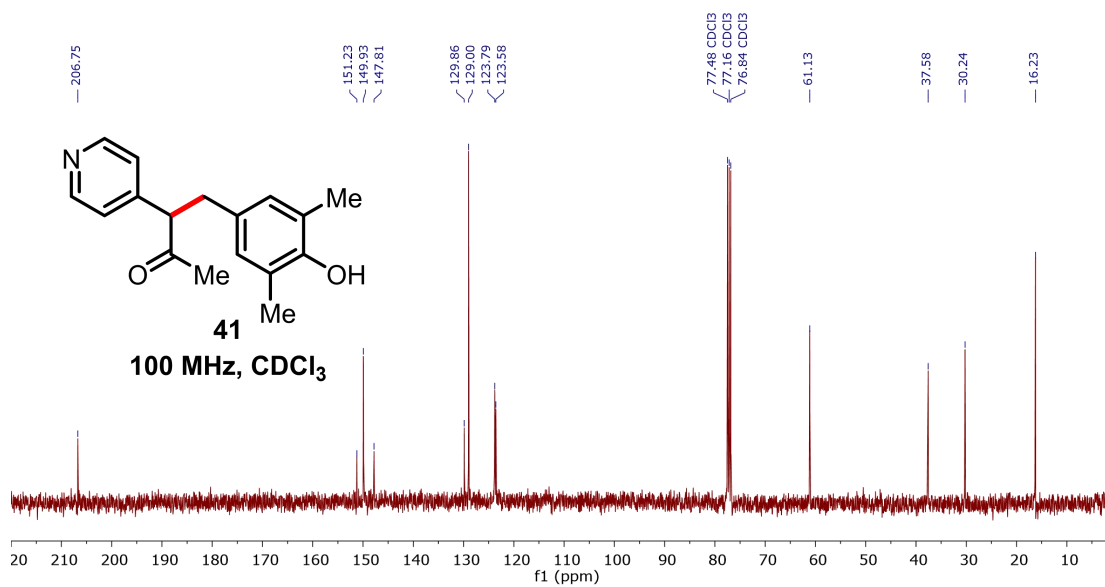

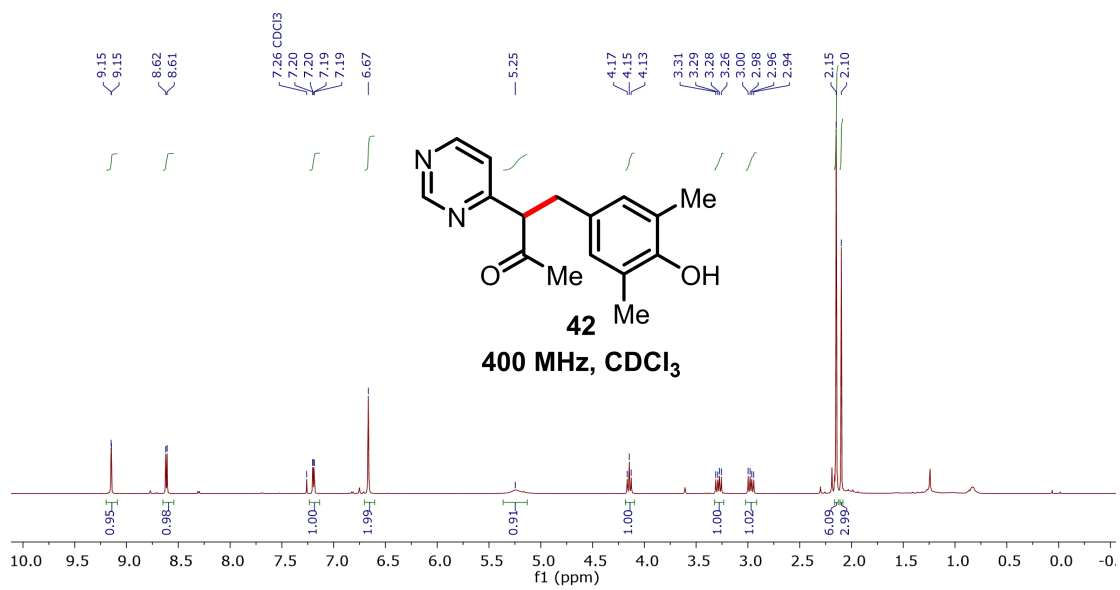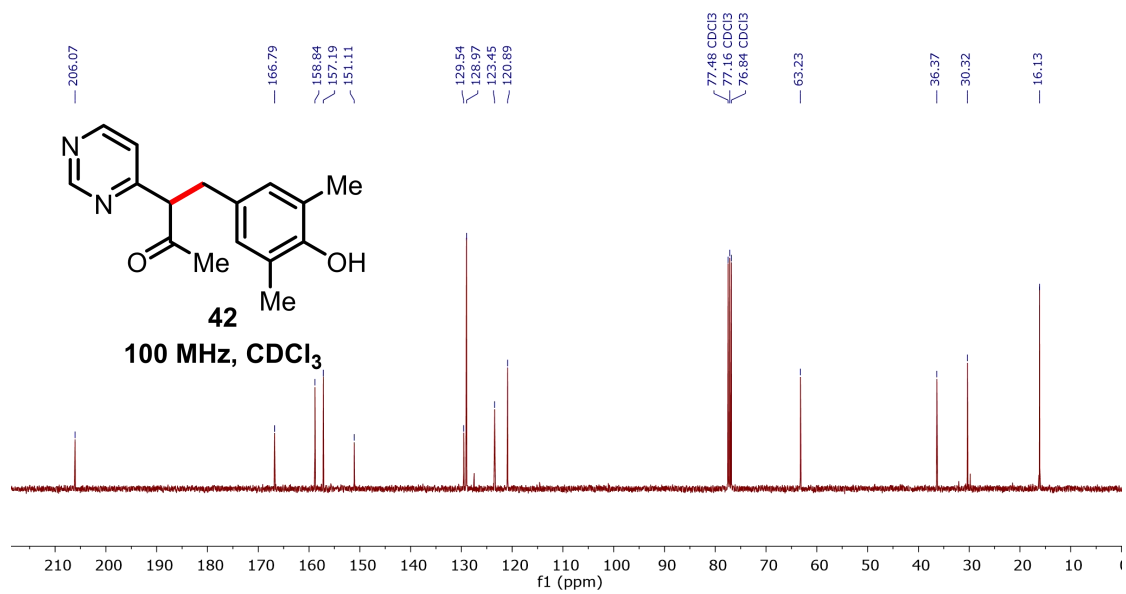

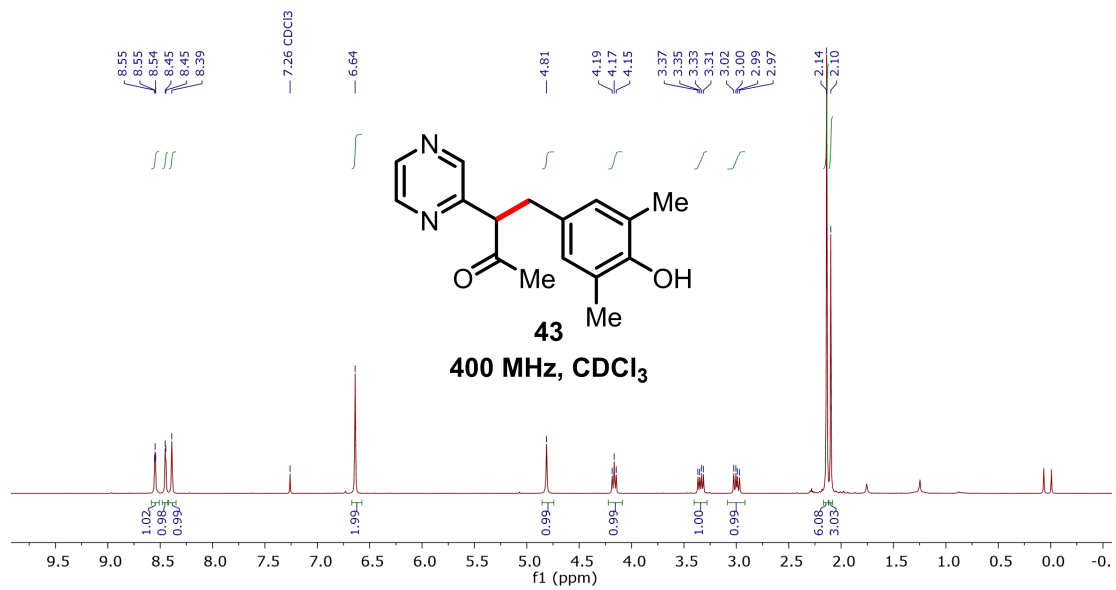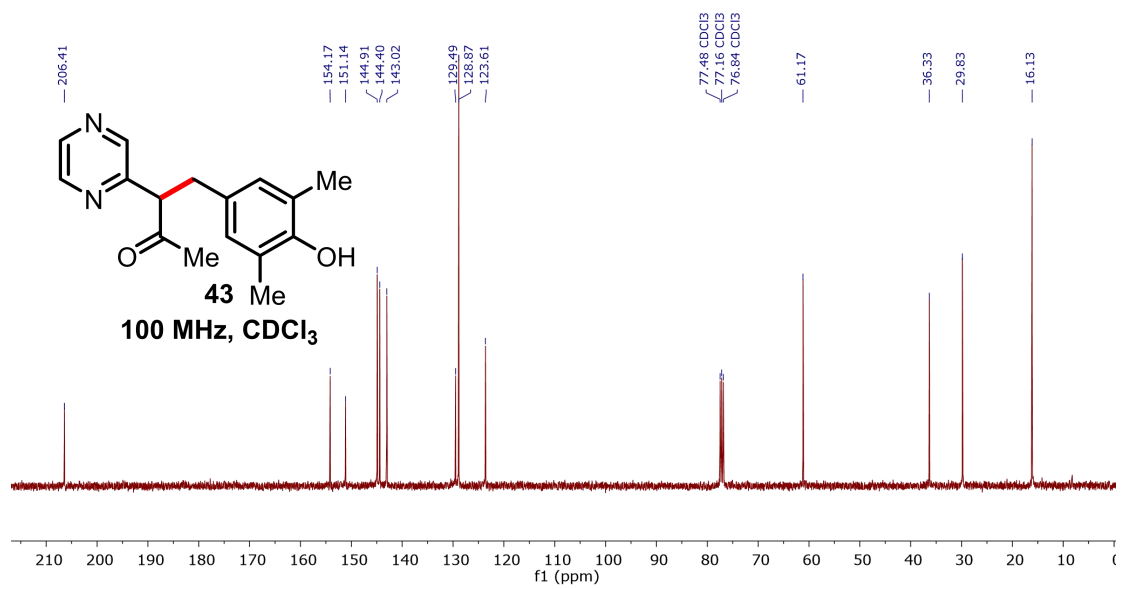



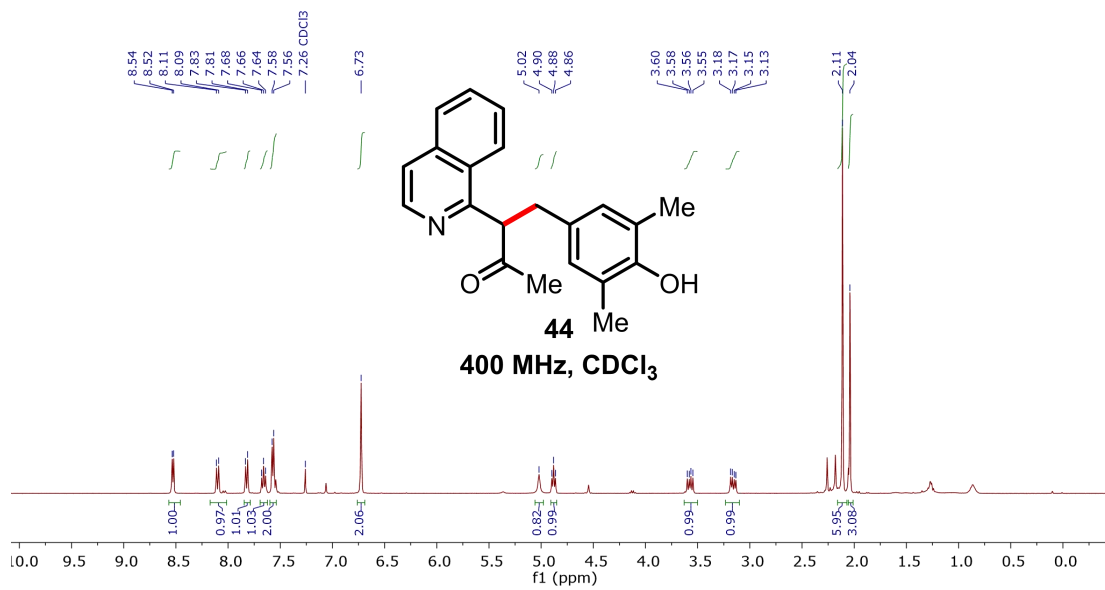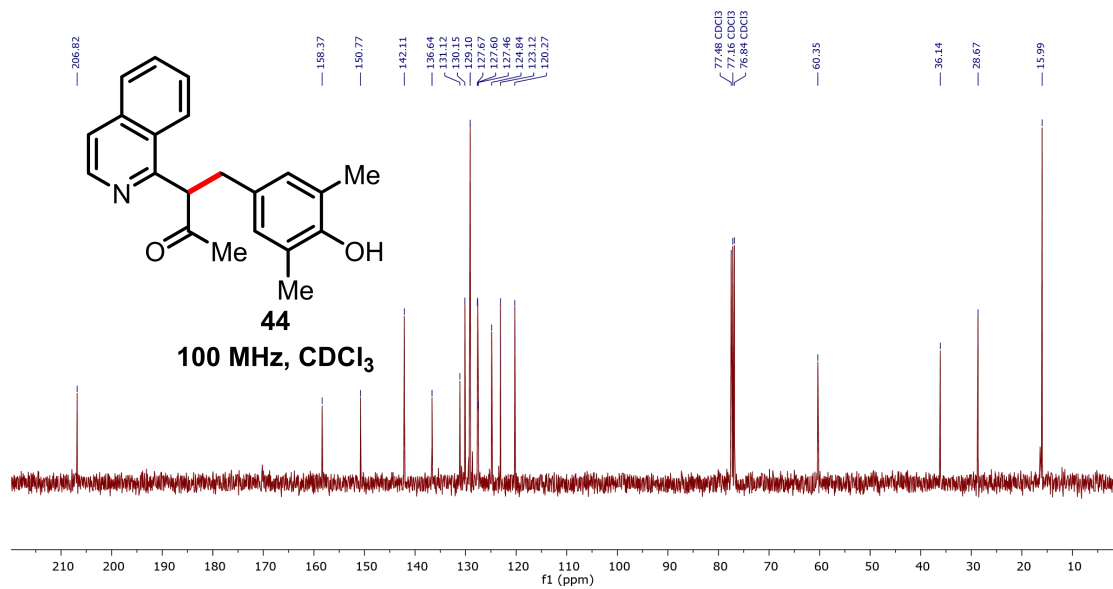

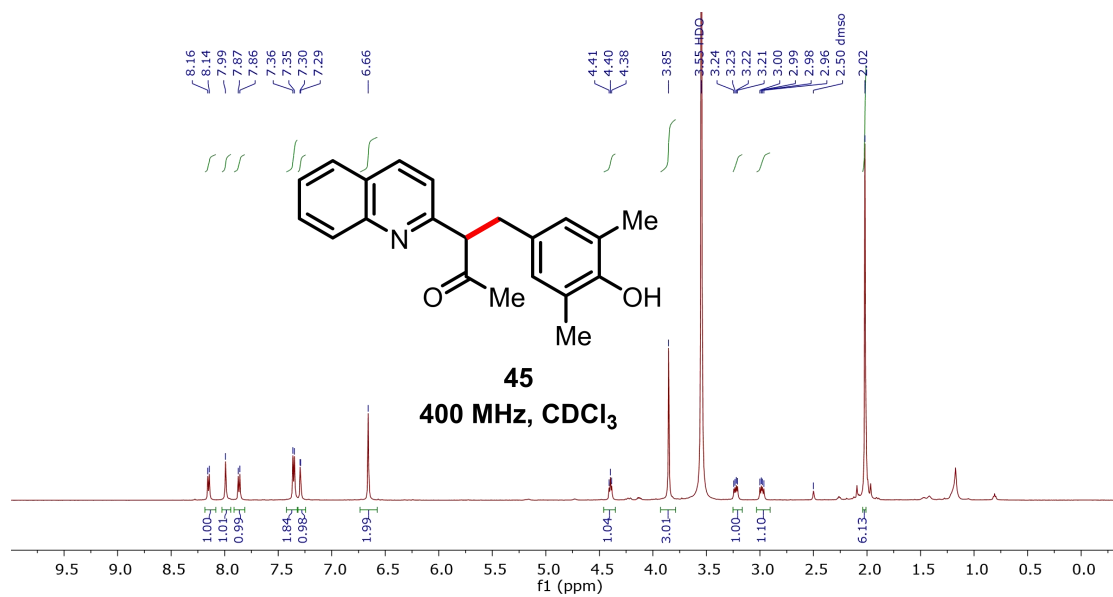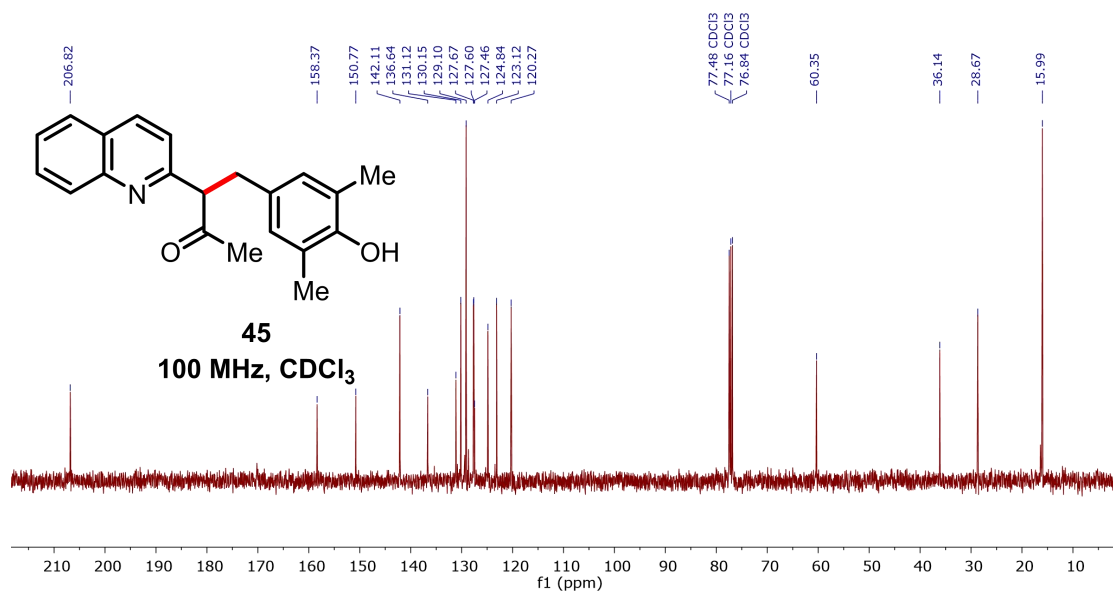

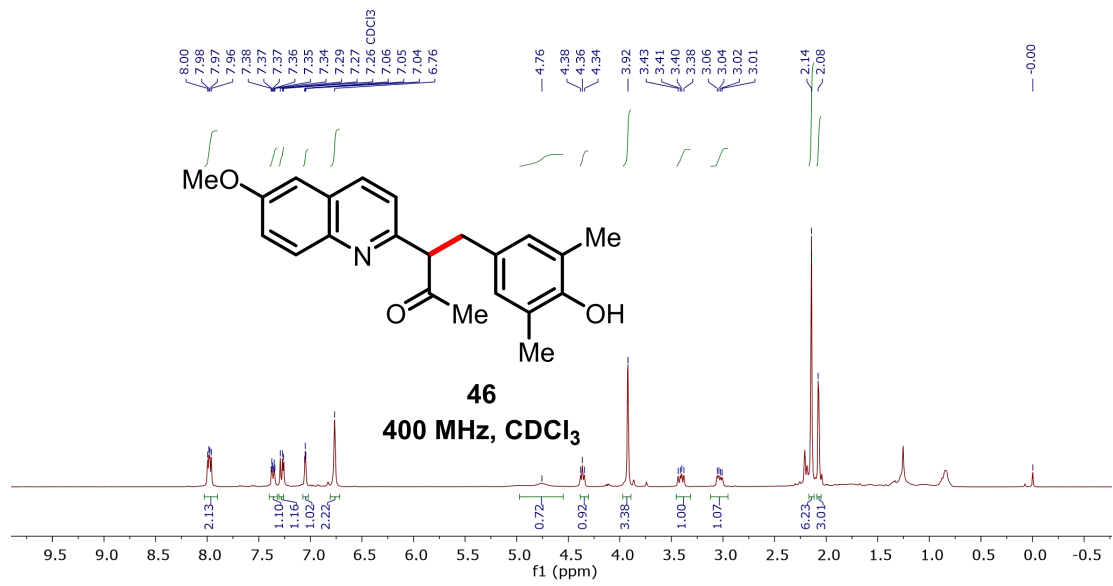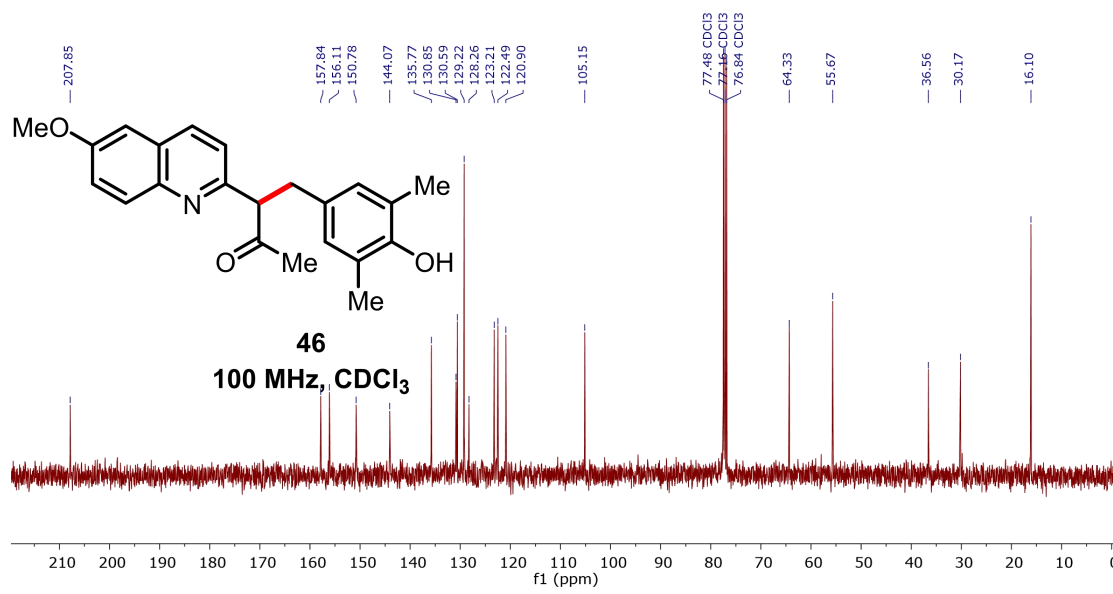

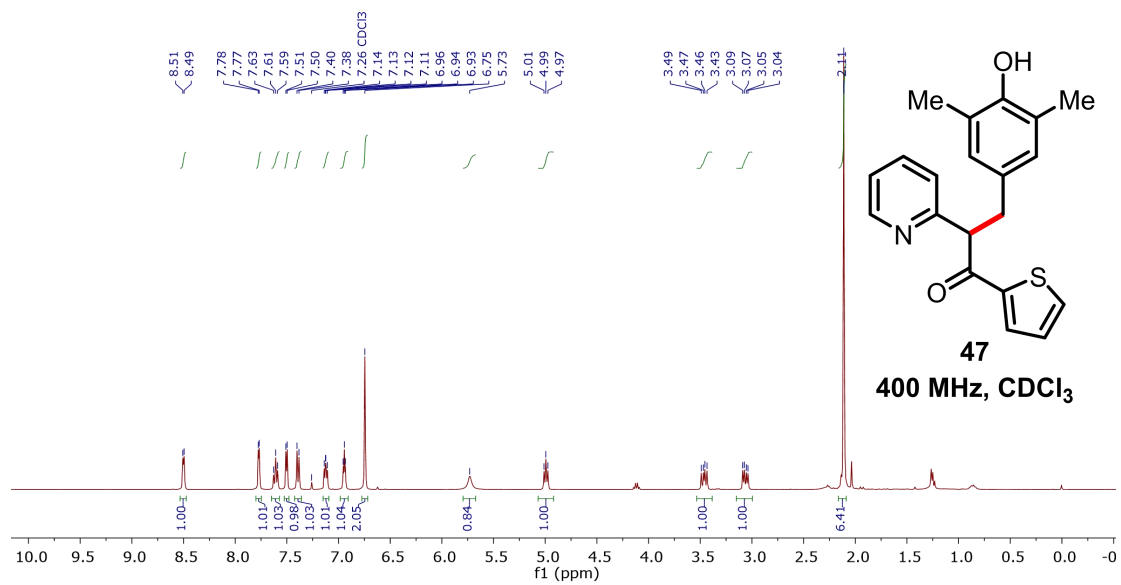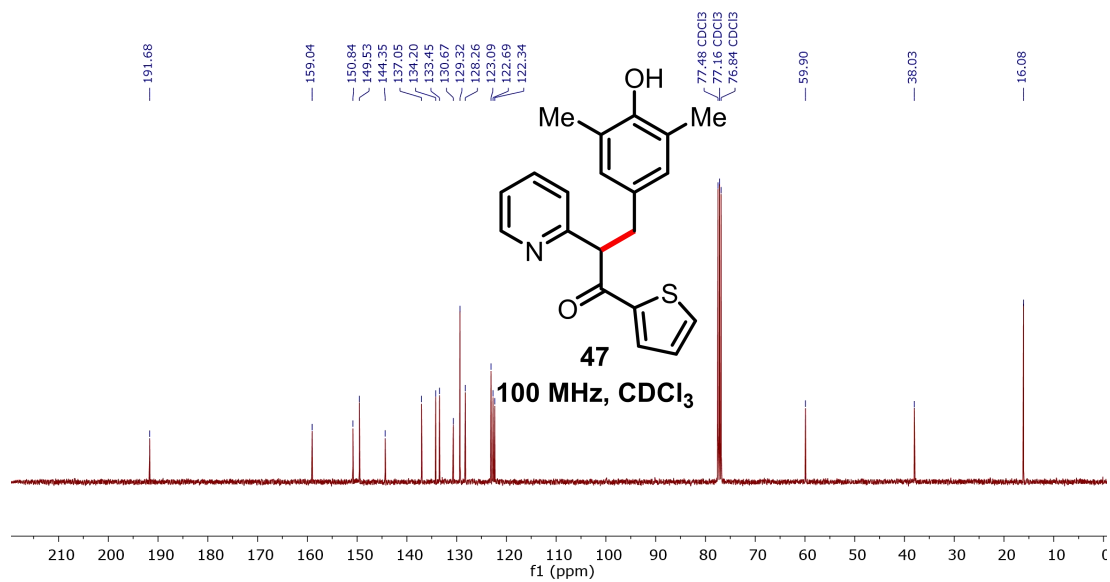

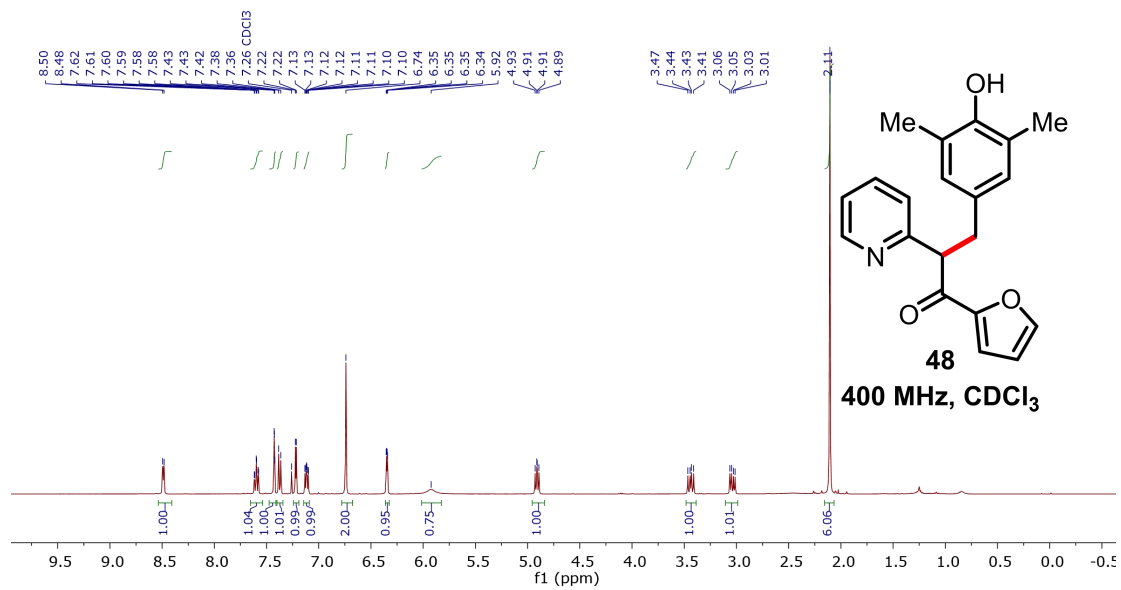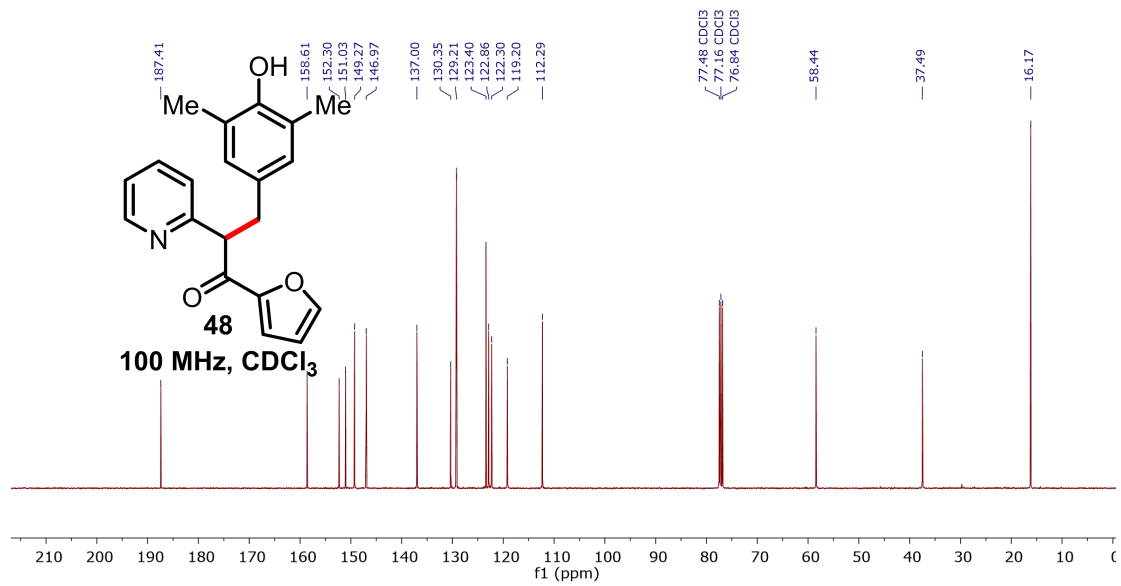

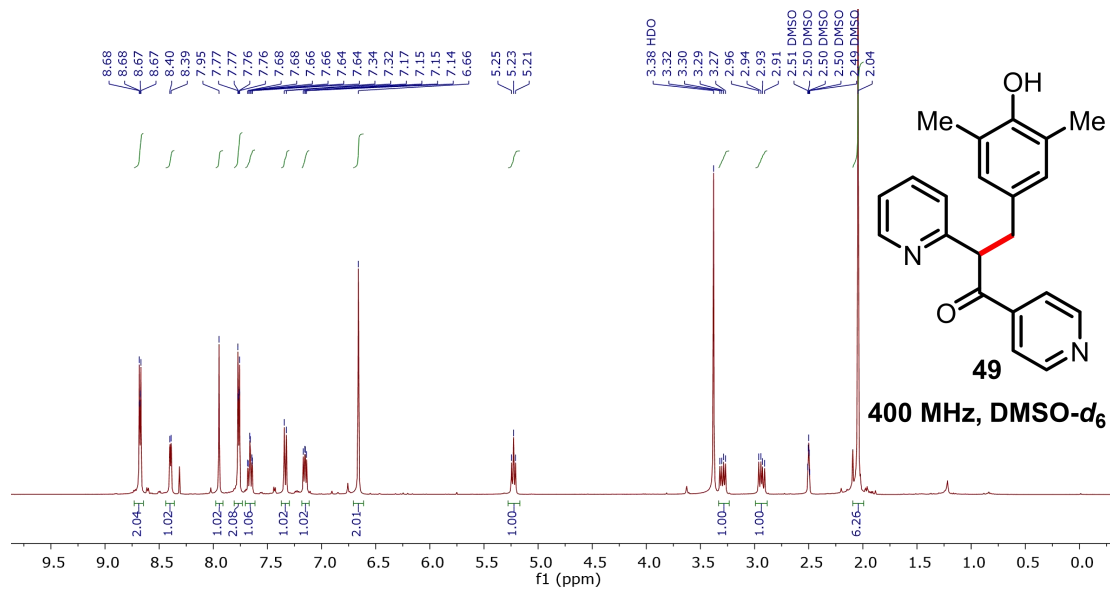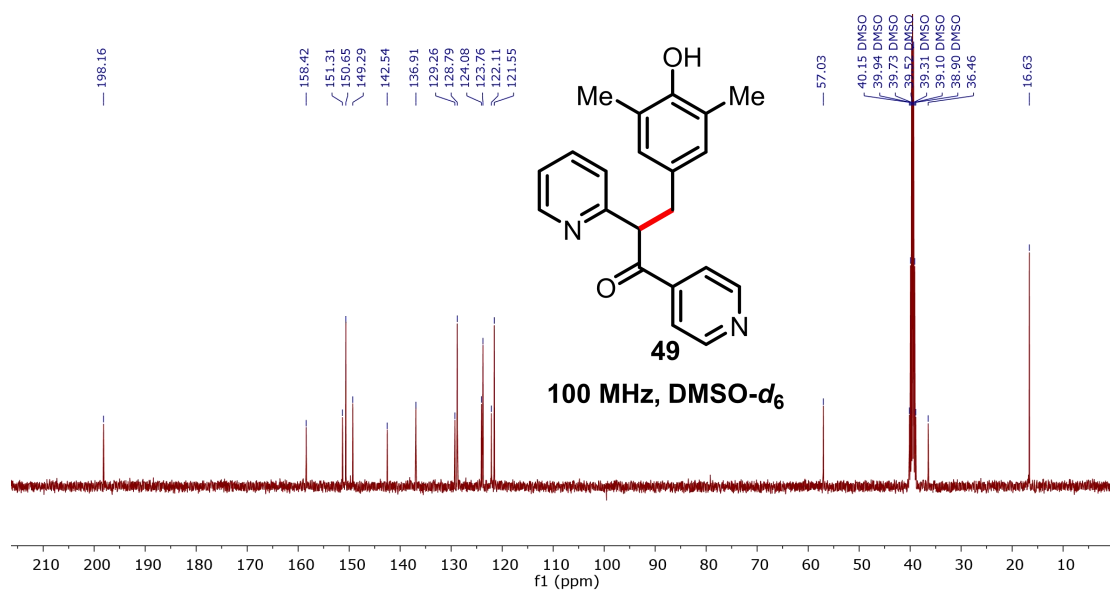

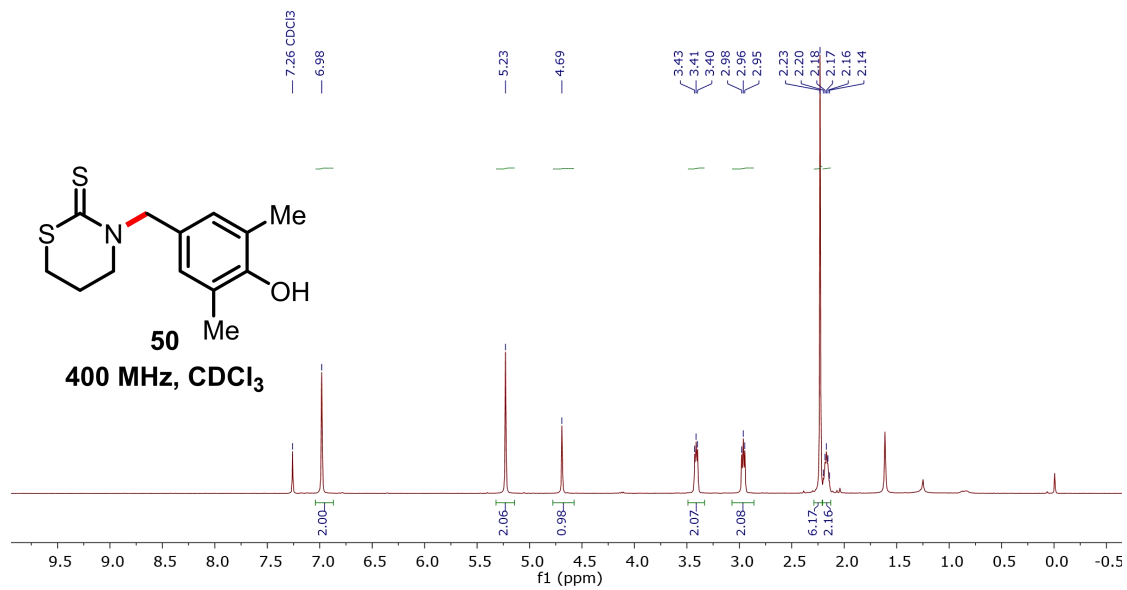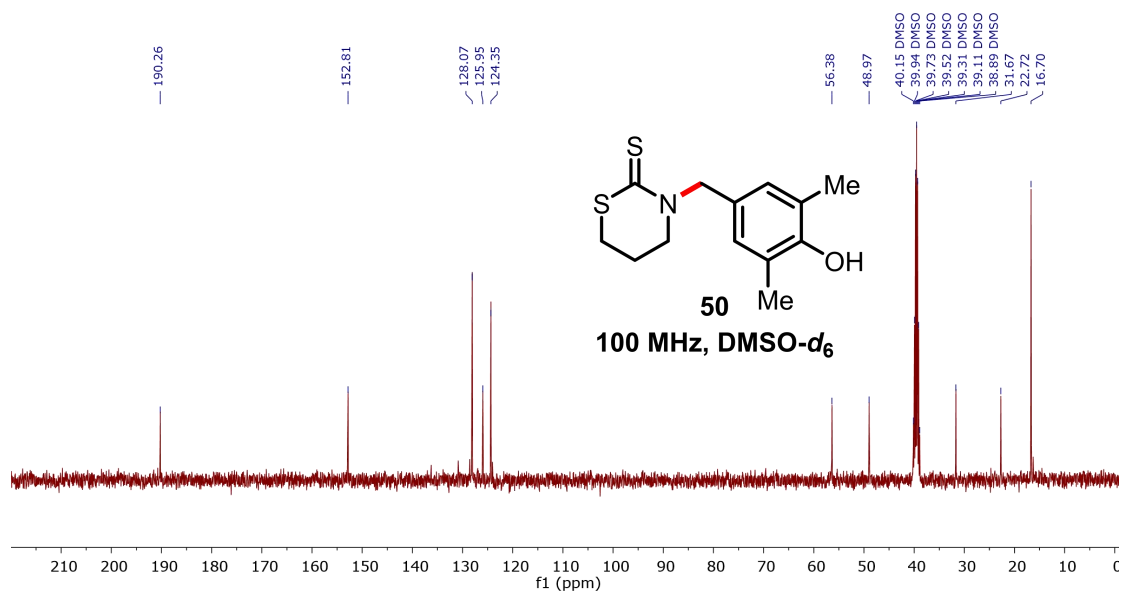

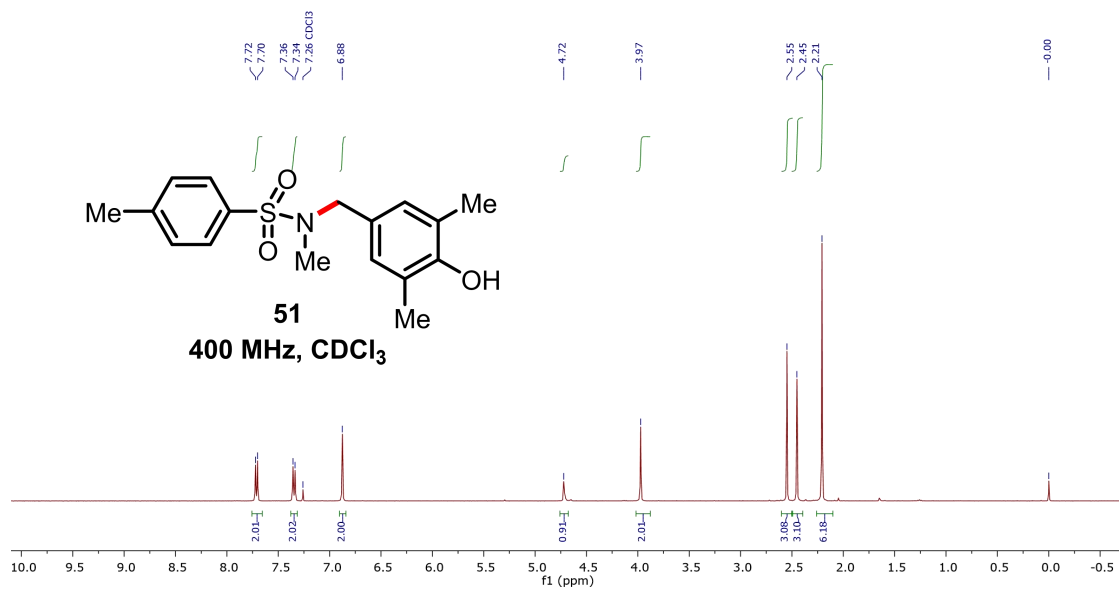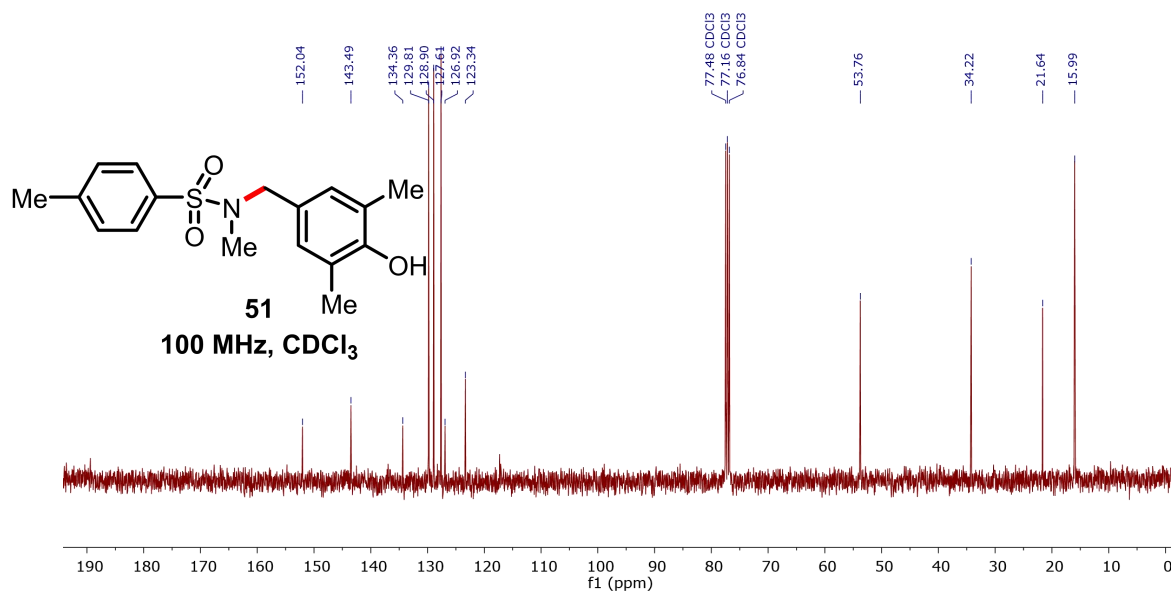



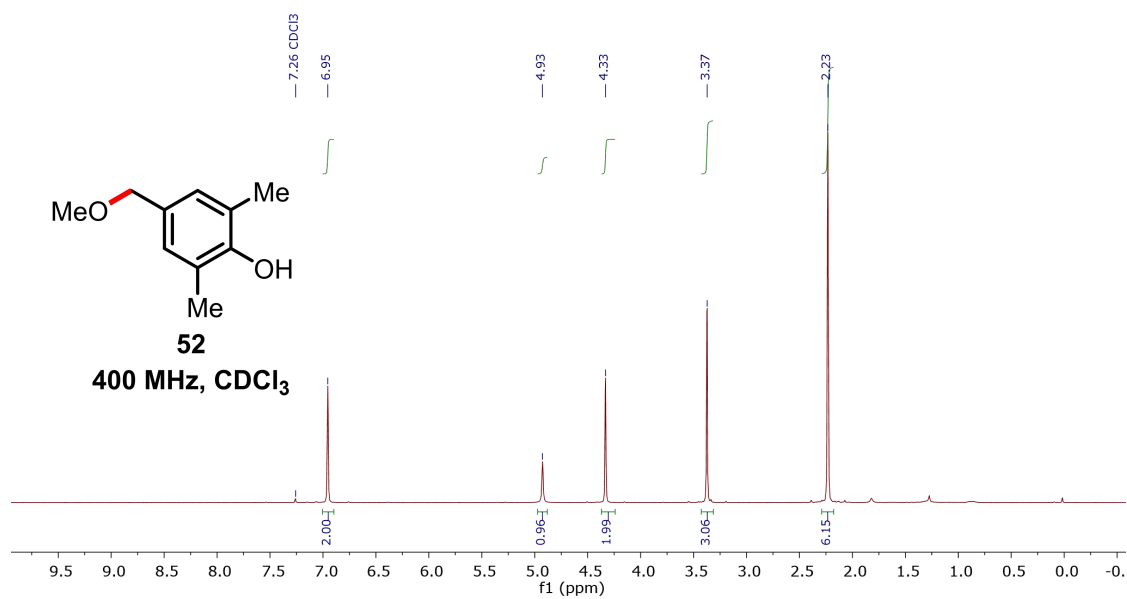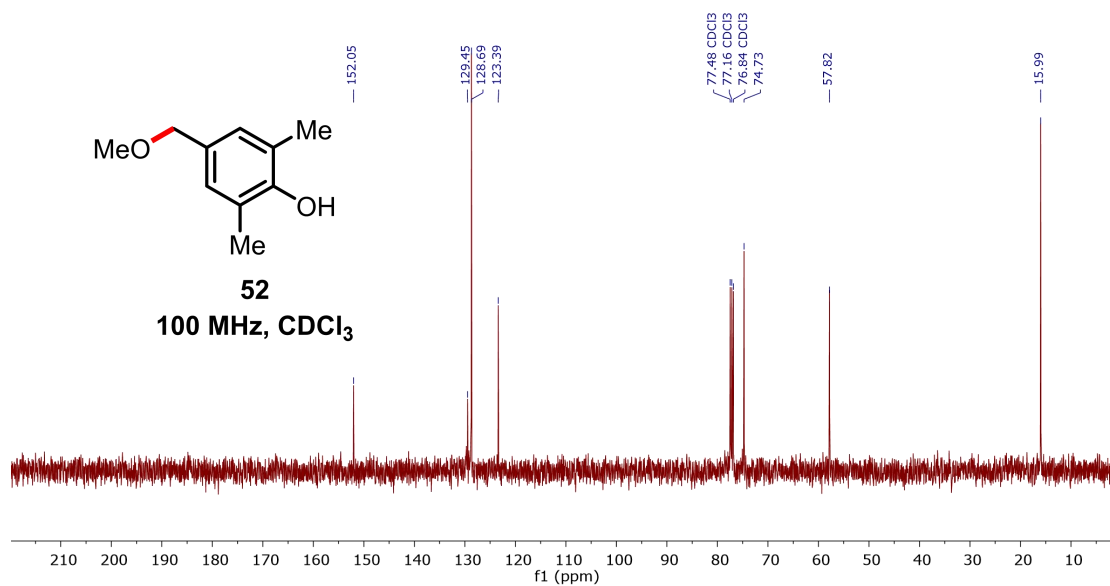

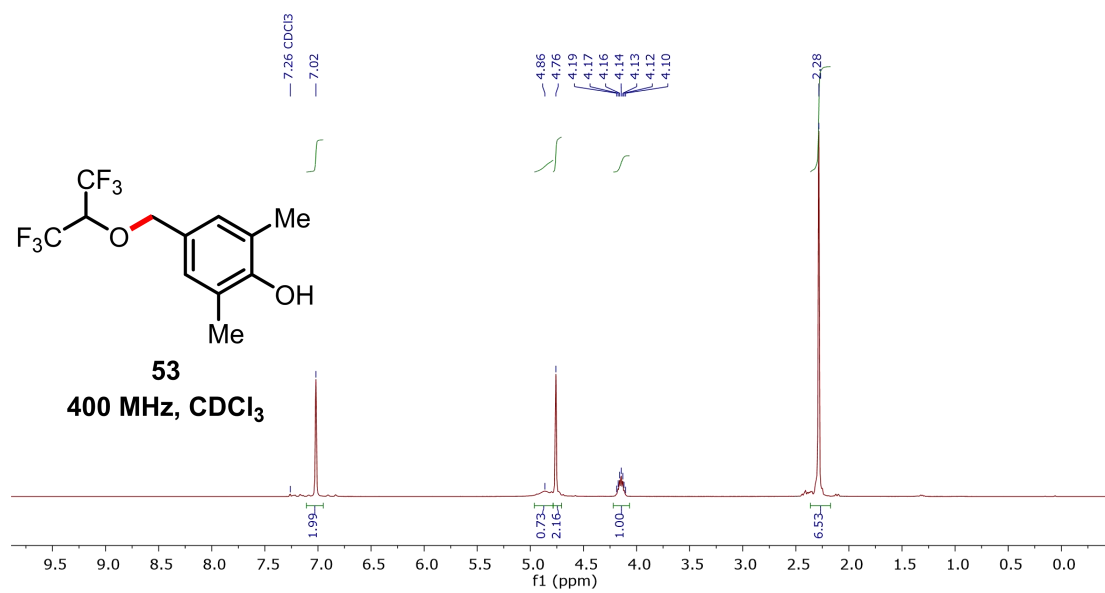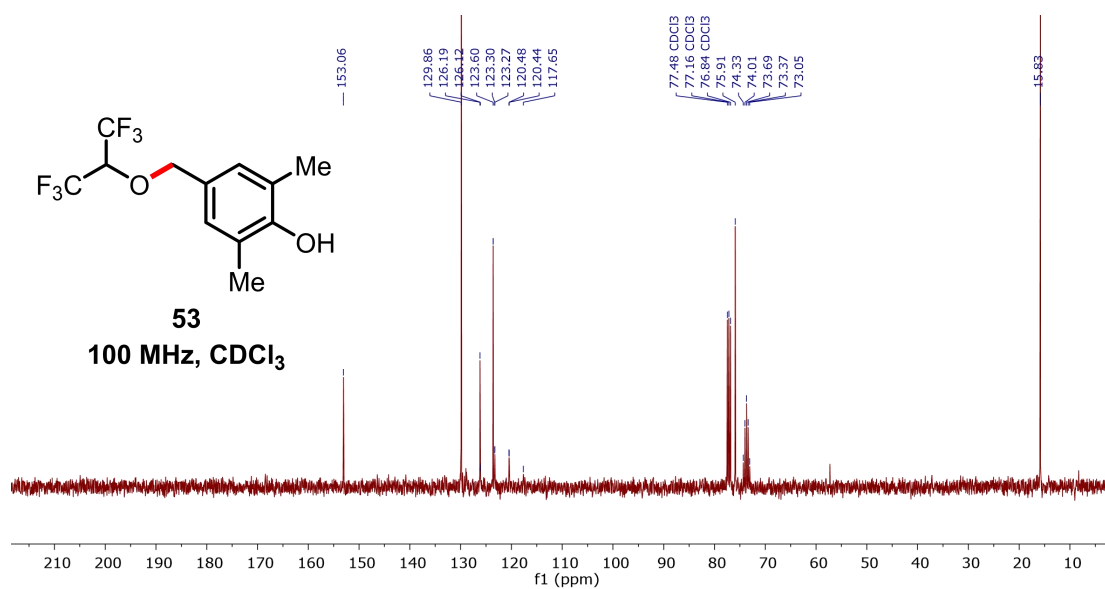

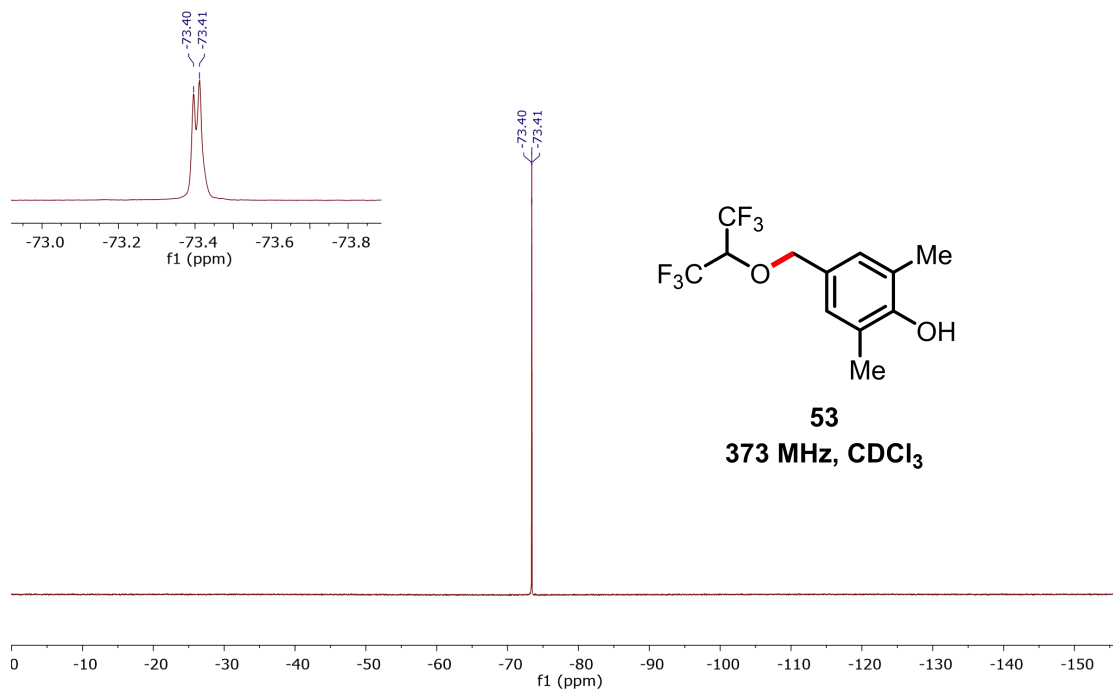

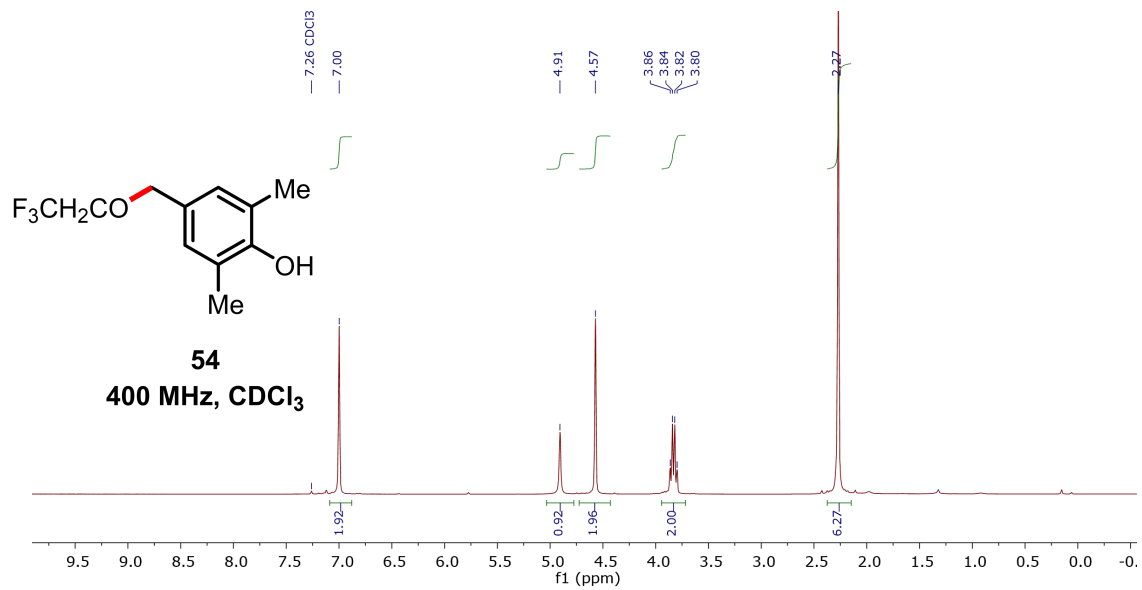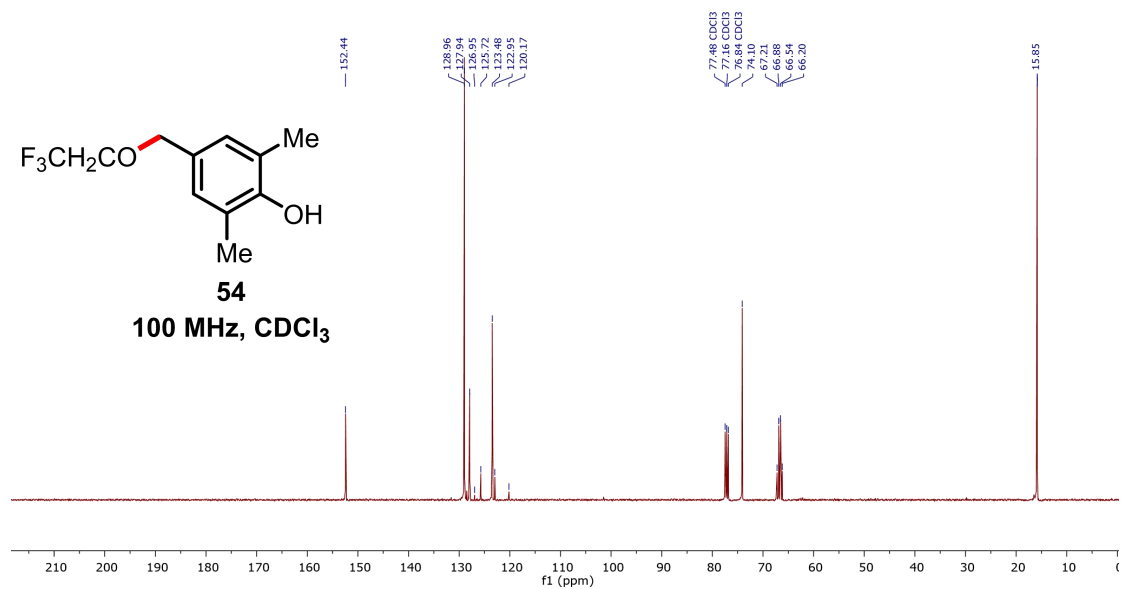

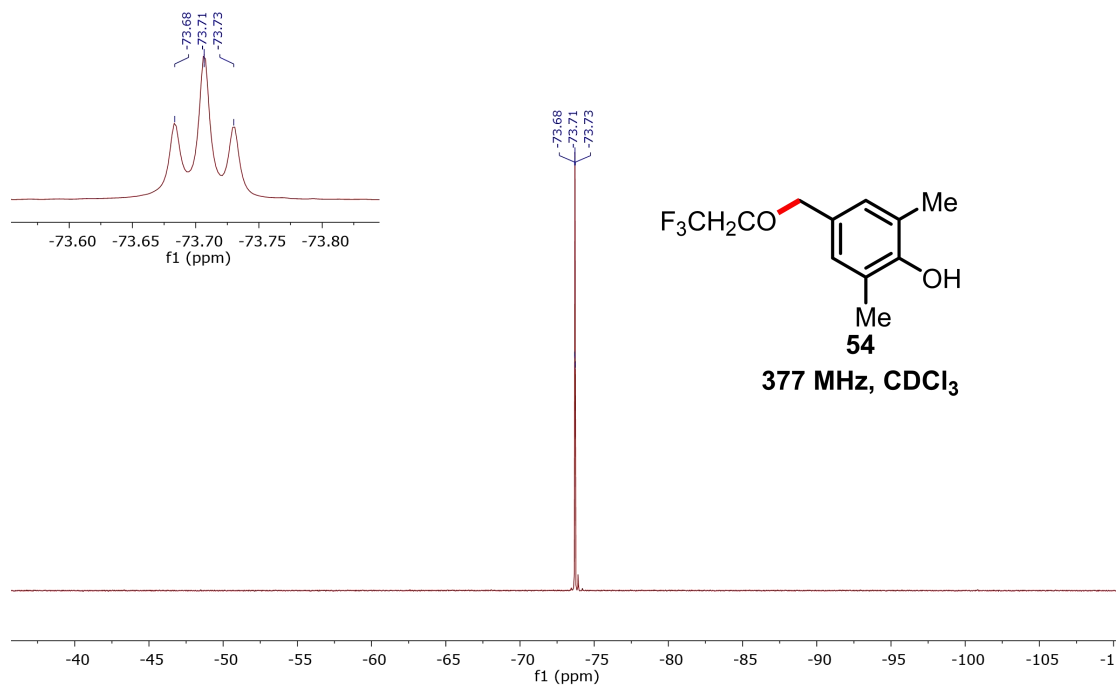

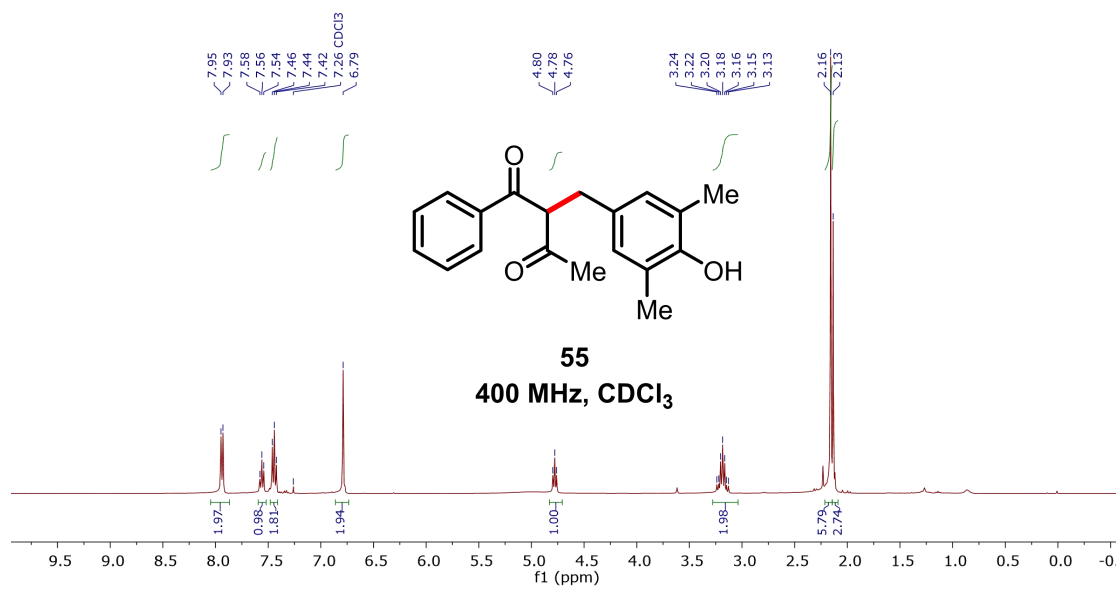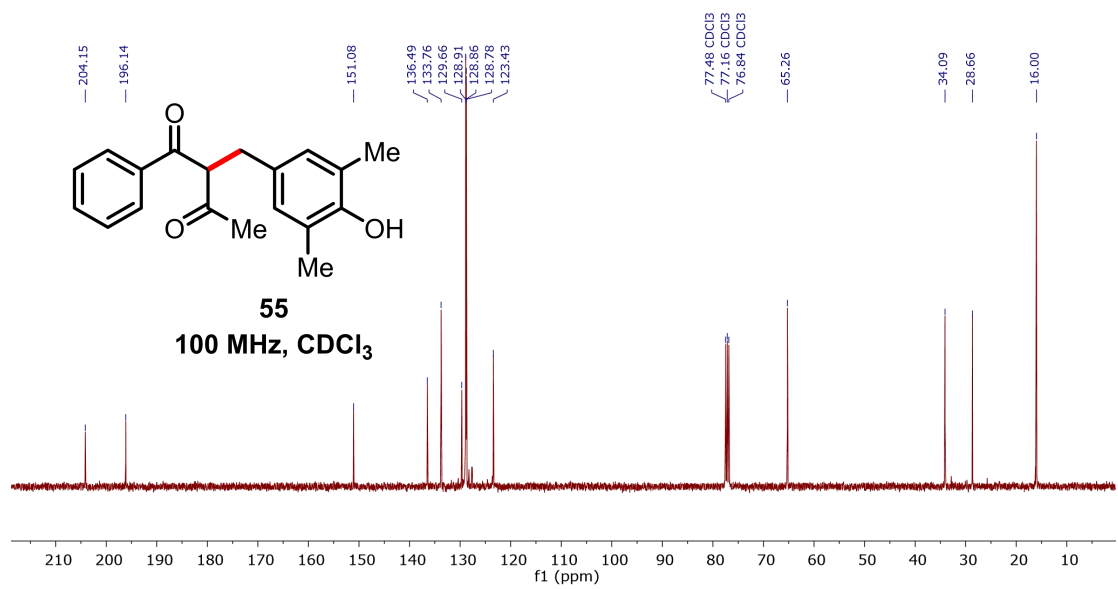

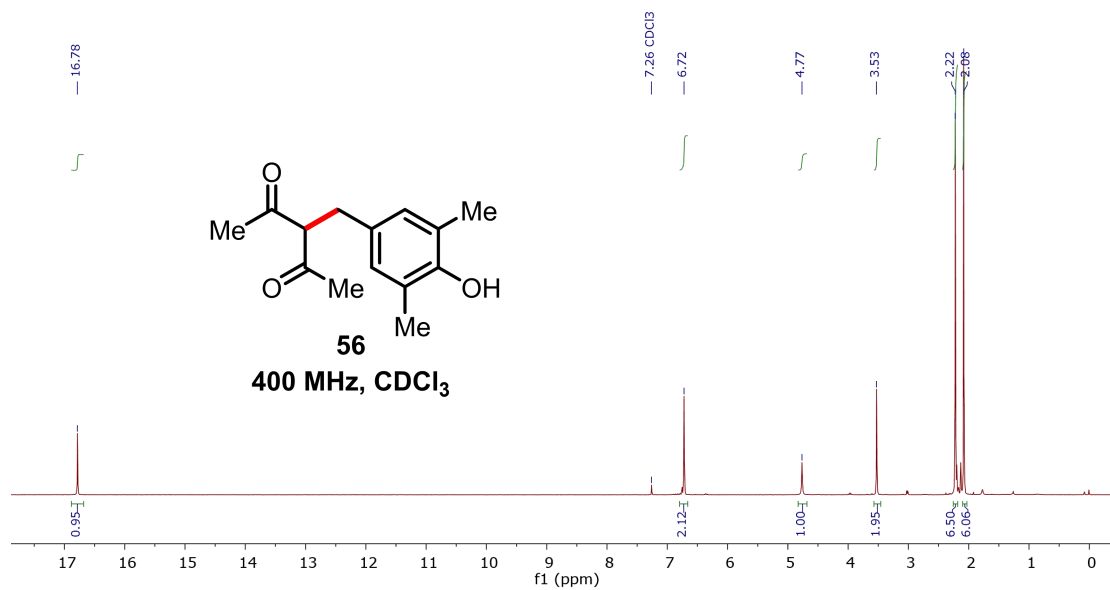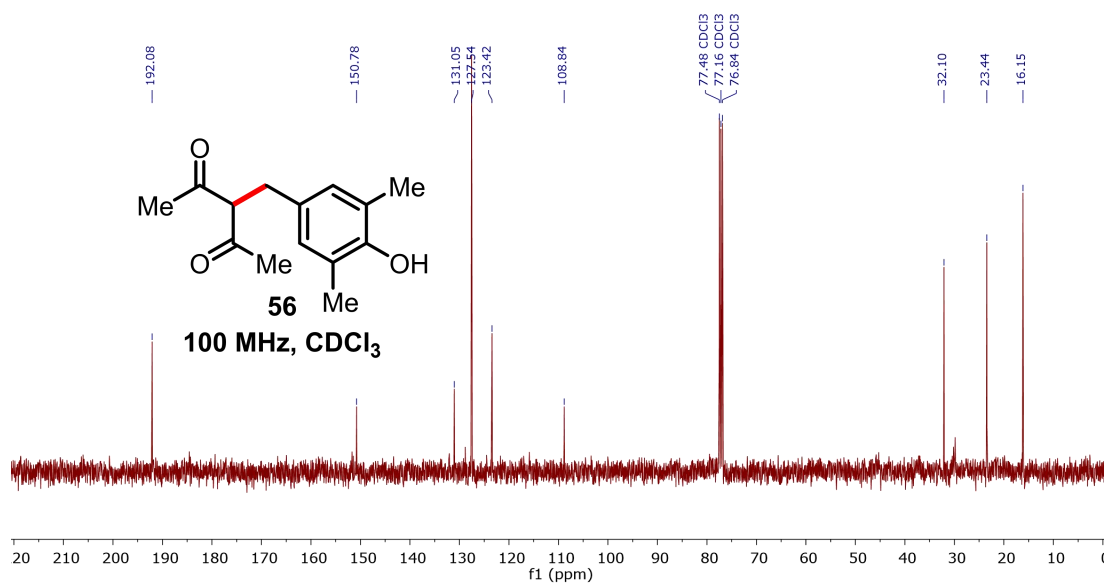

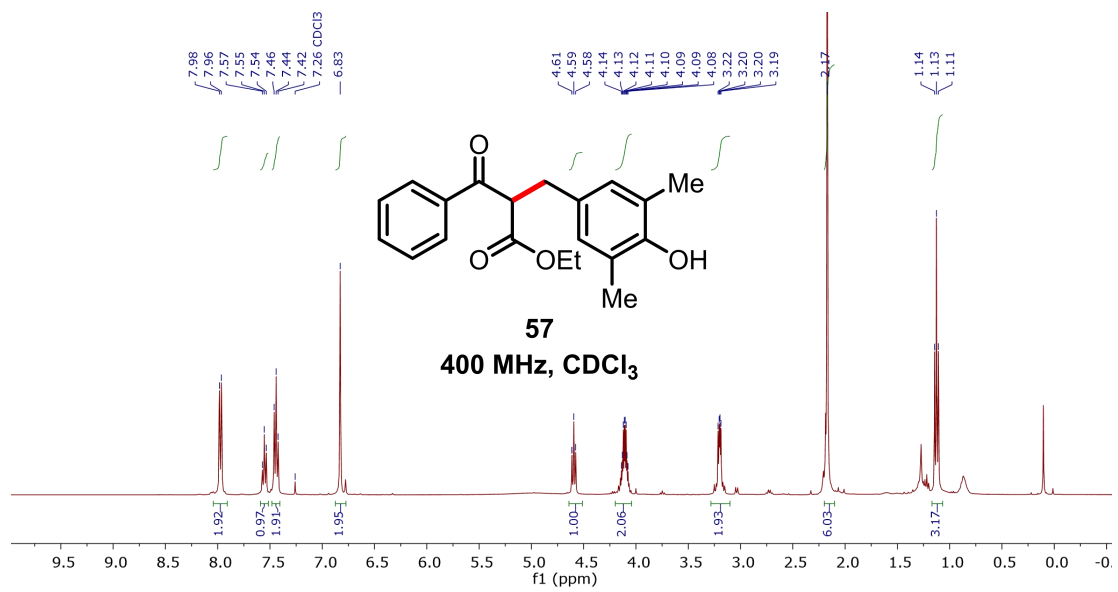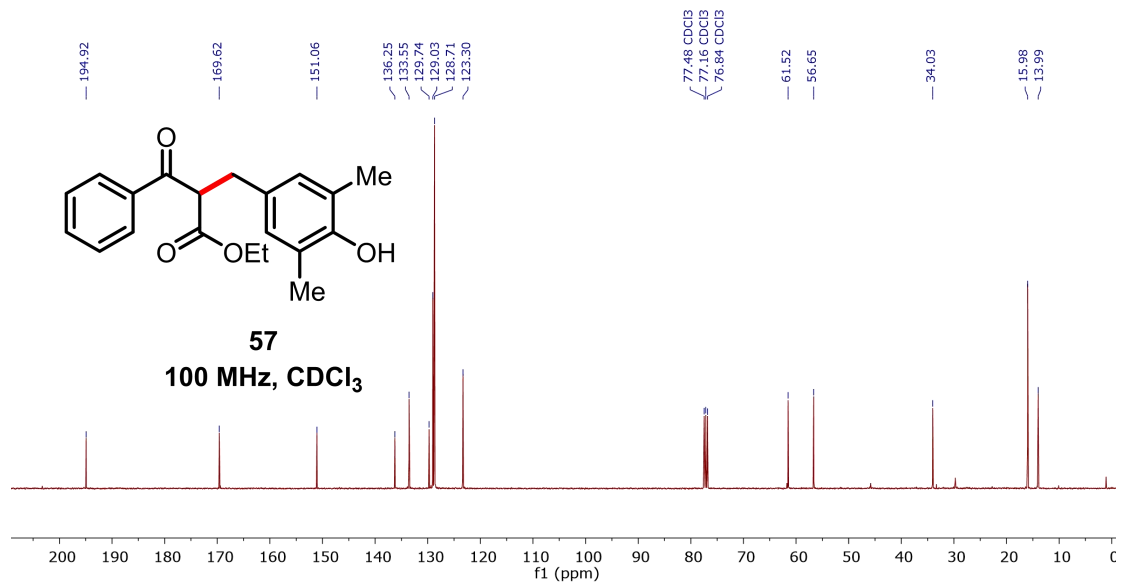



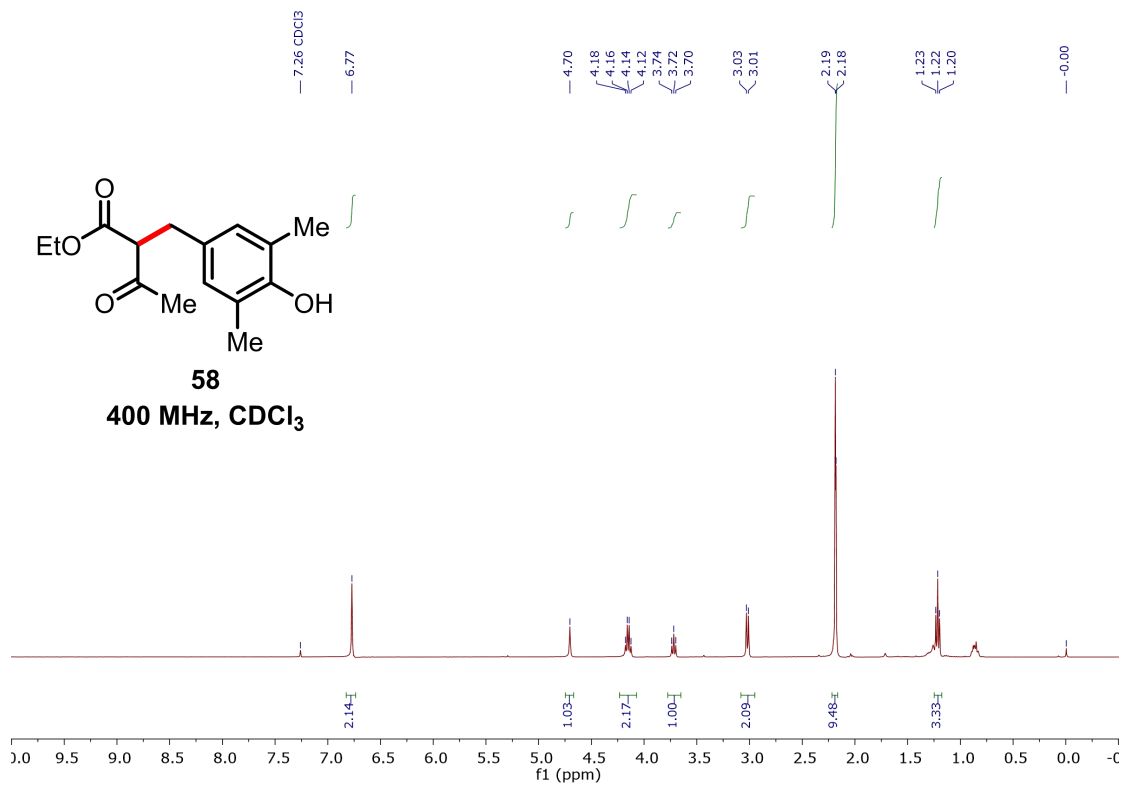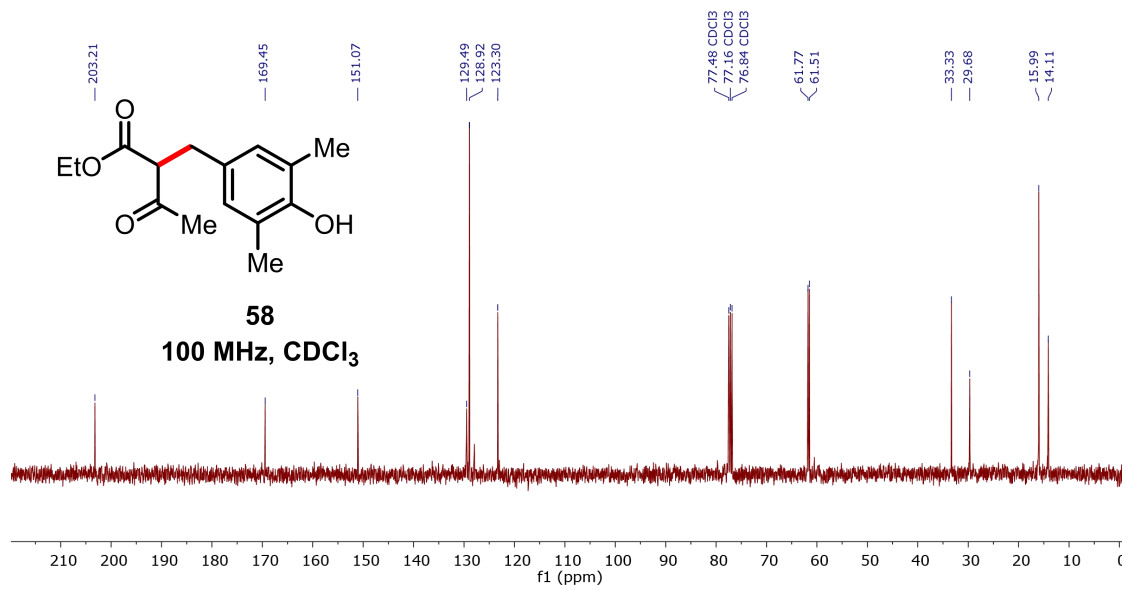

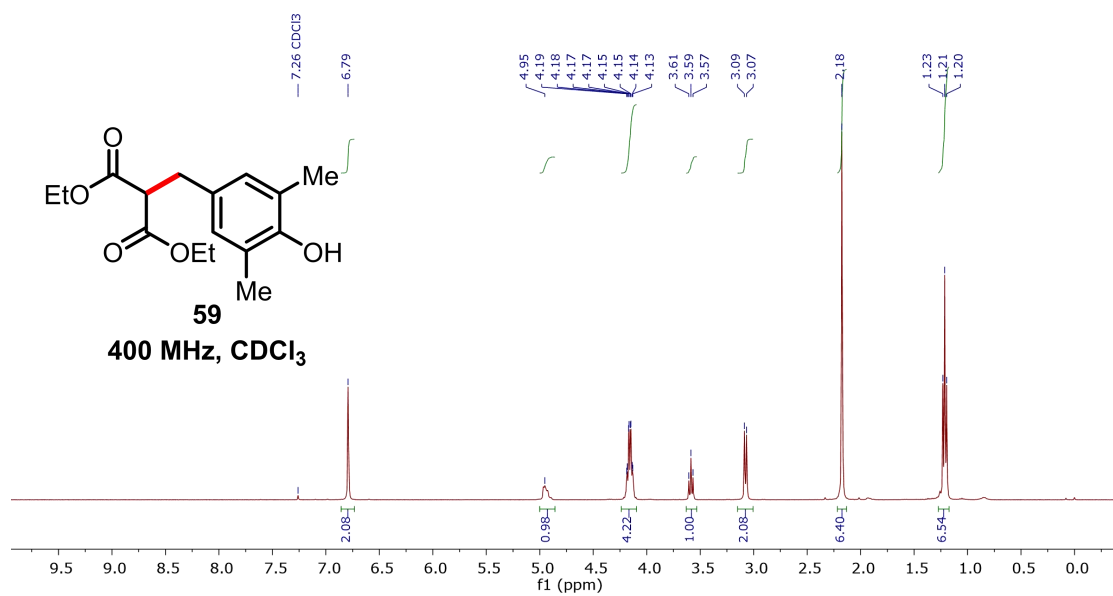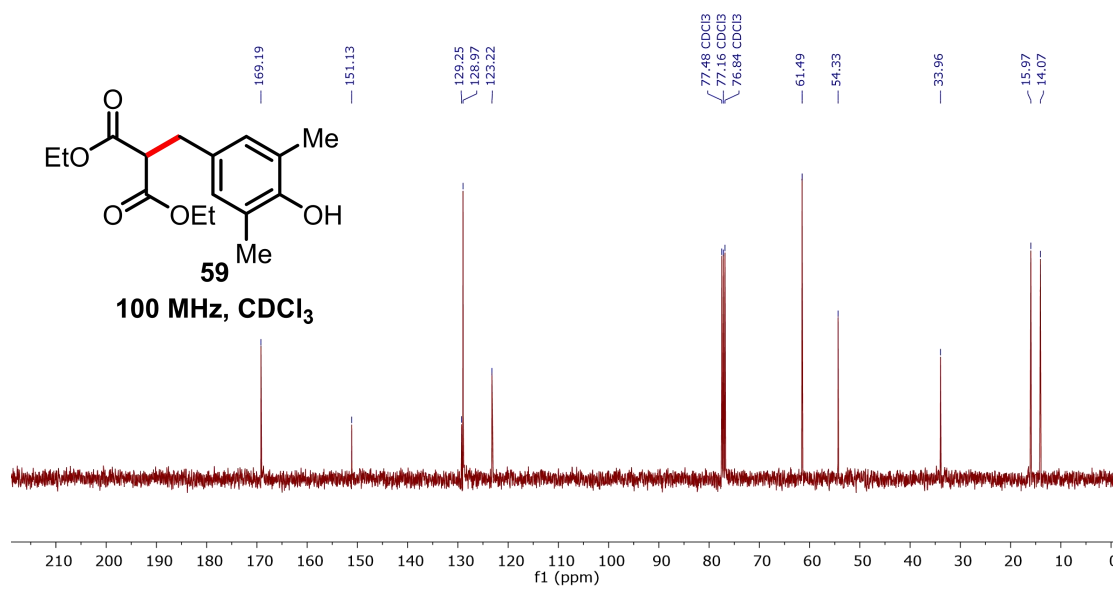

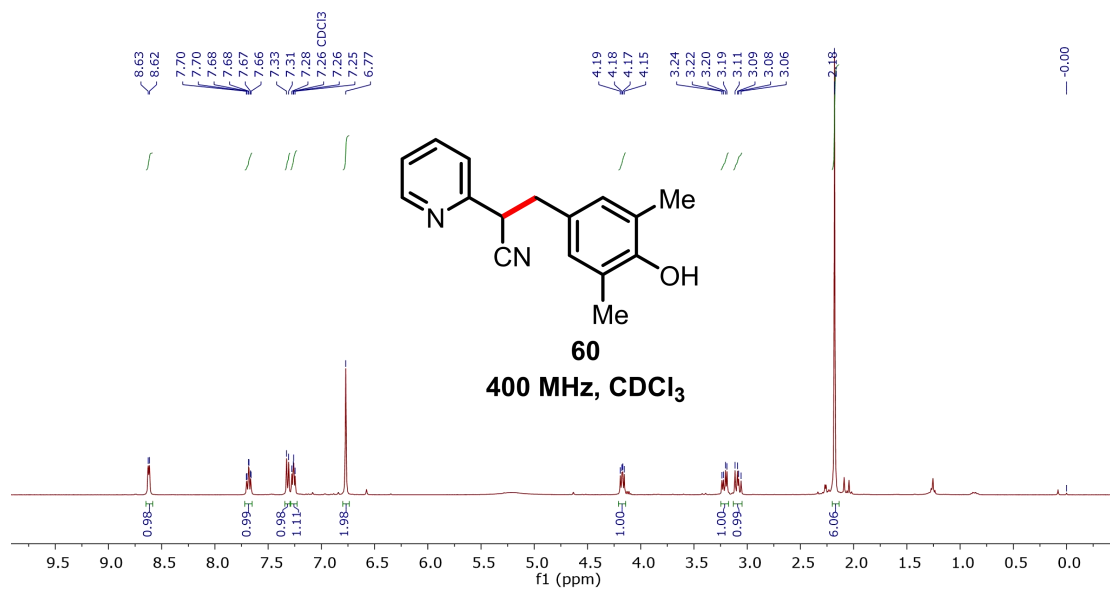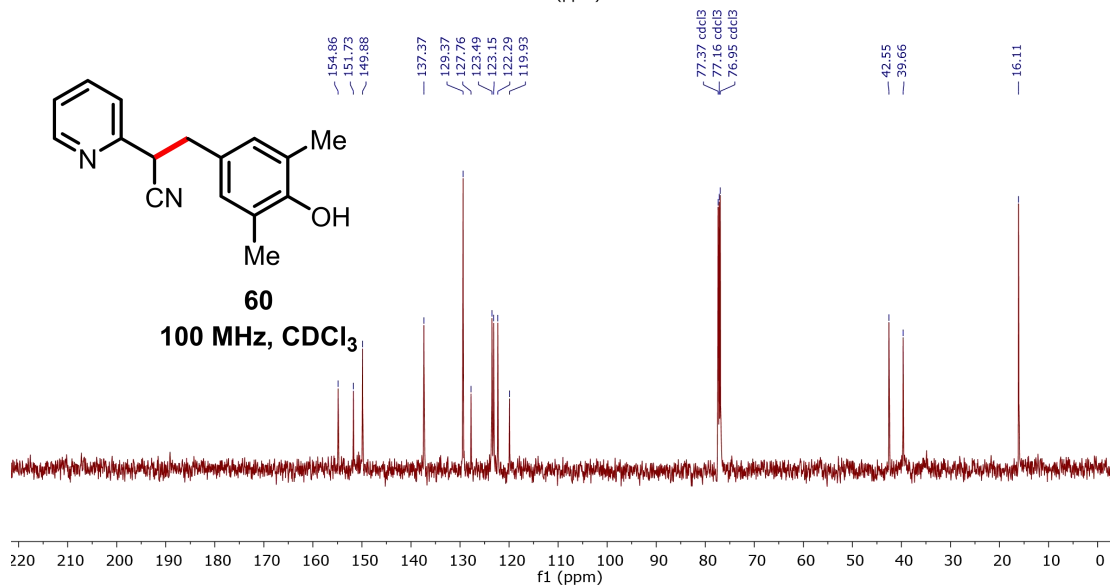

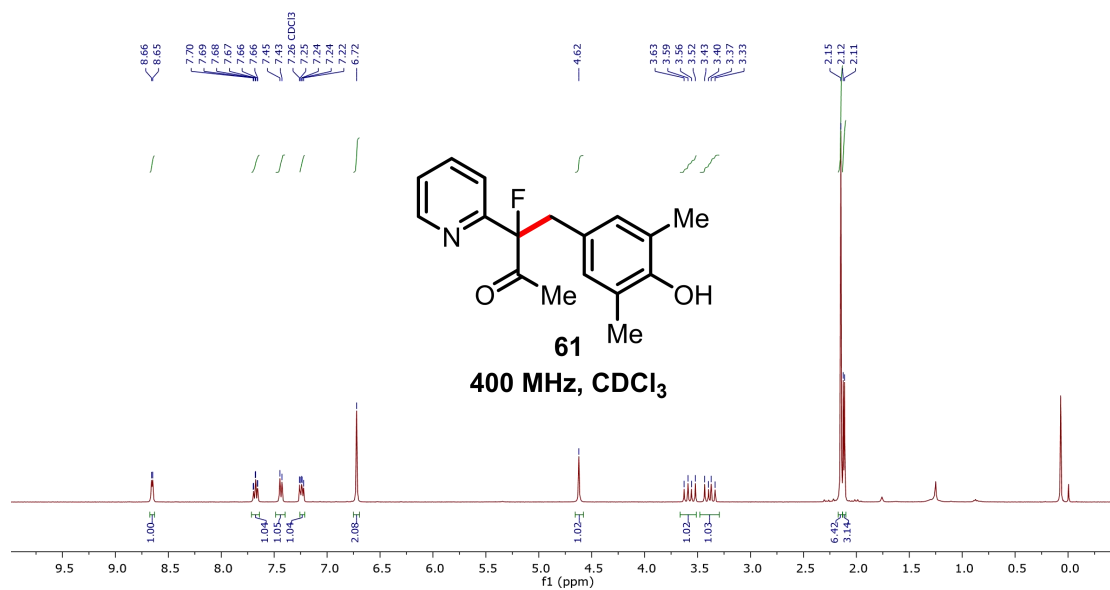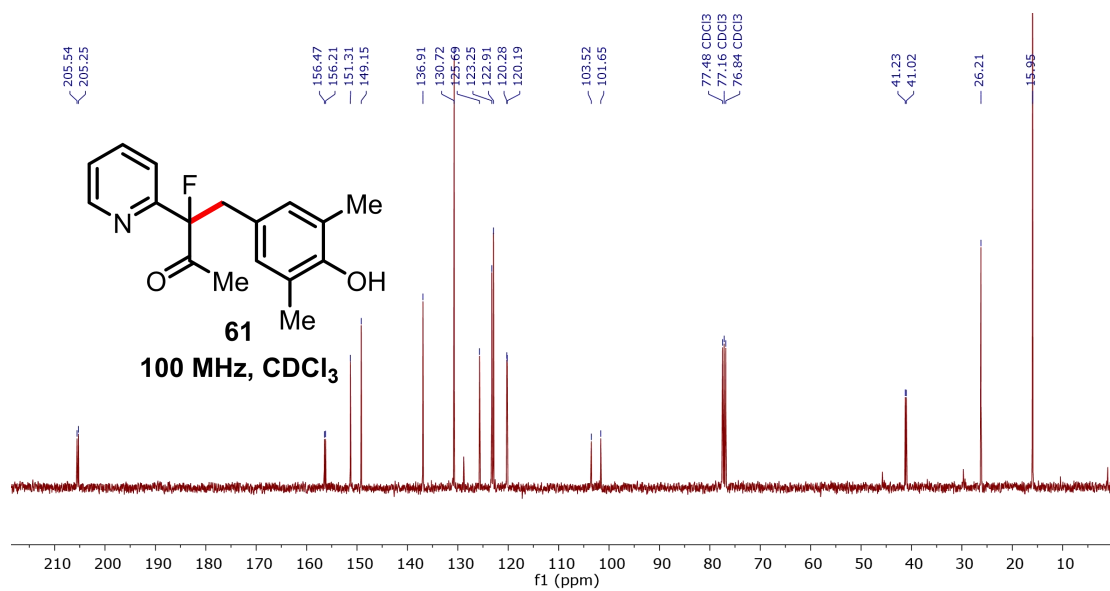

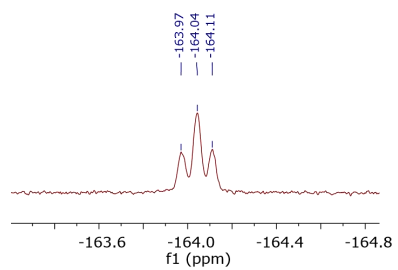

-163.97  
-164.04  
-164.11

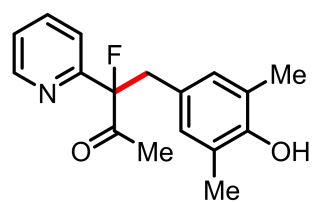

**61**  
**377 MHz, CDCl<sub>3</sub>**

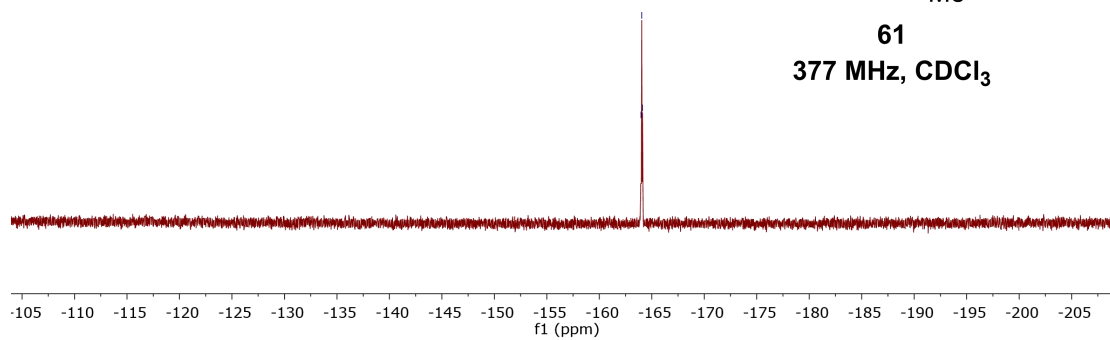

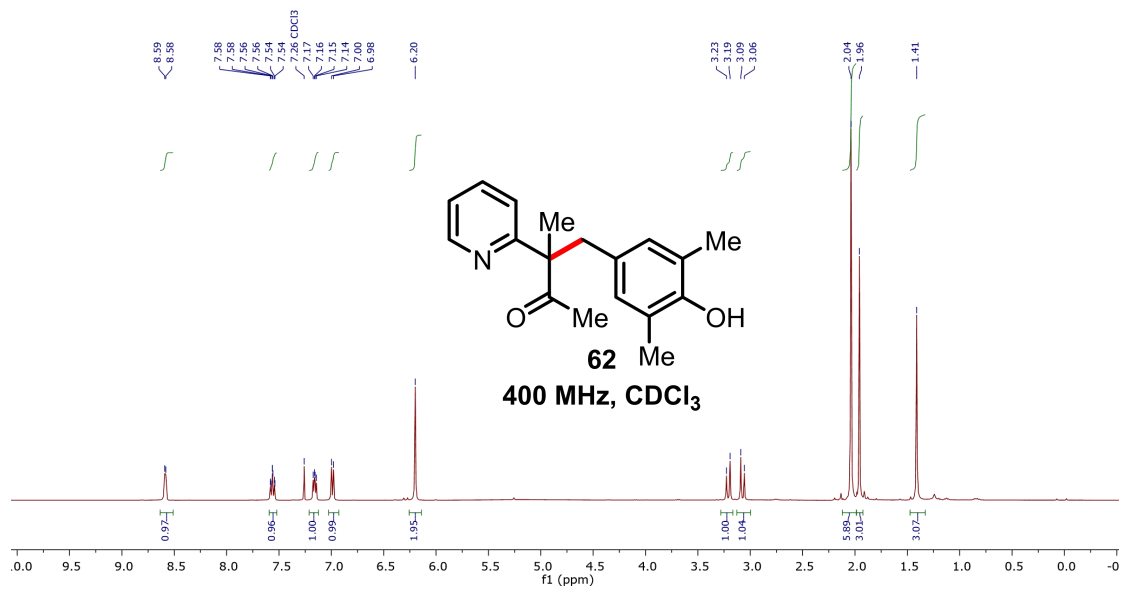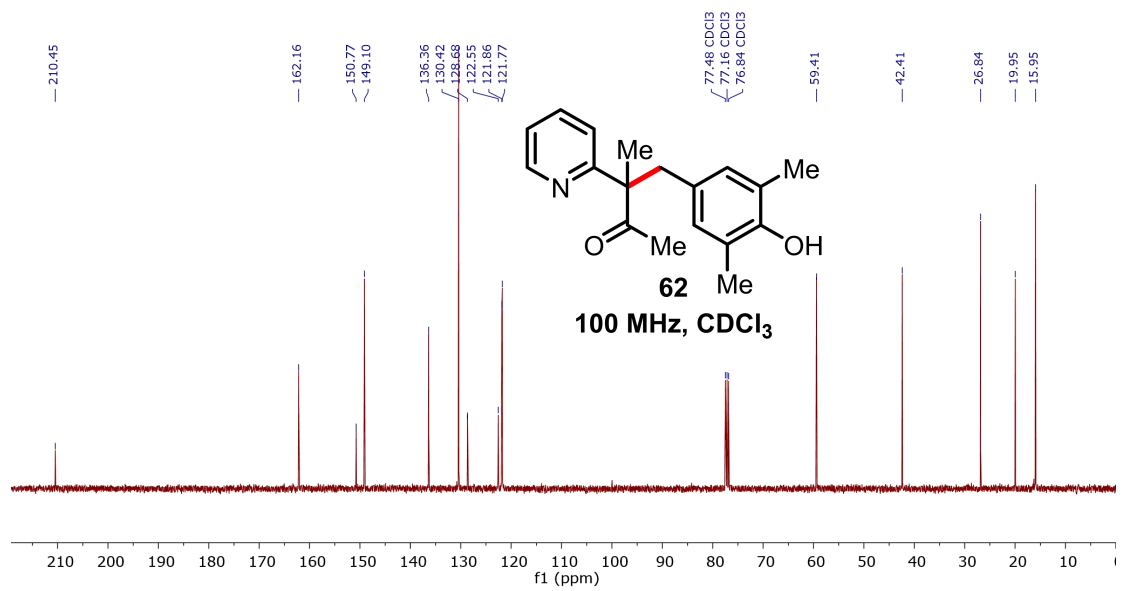

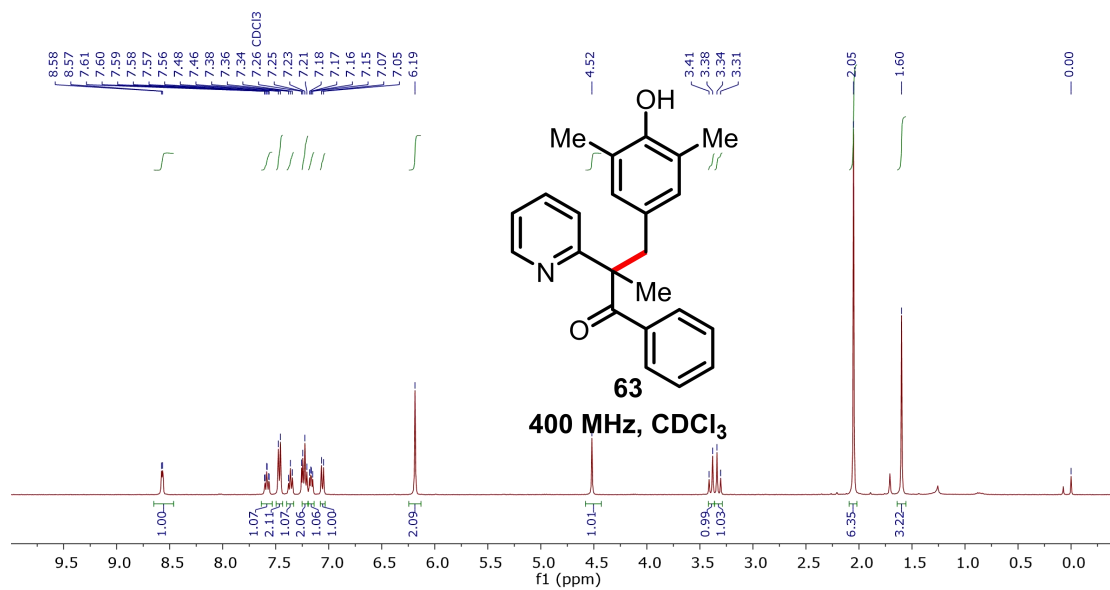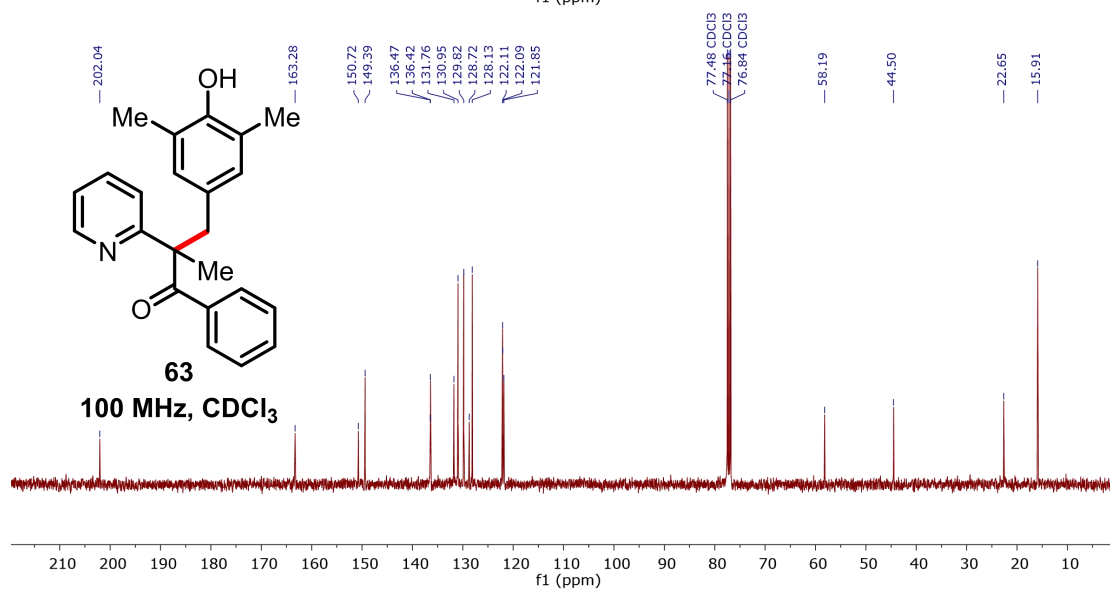

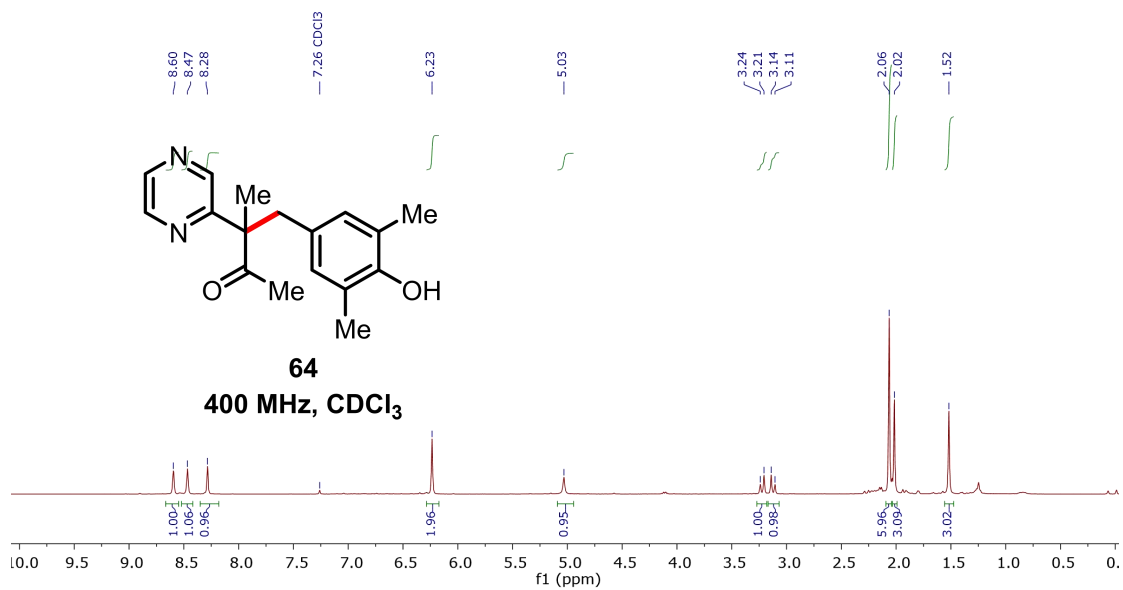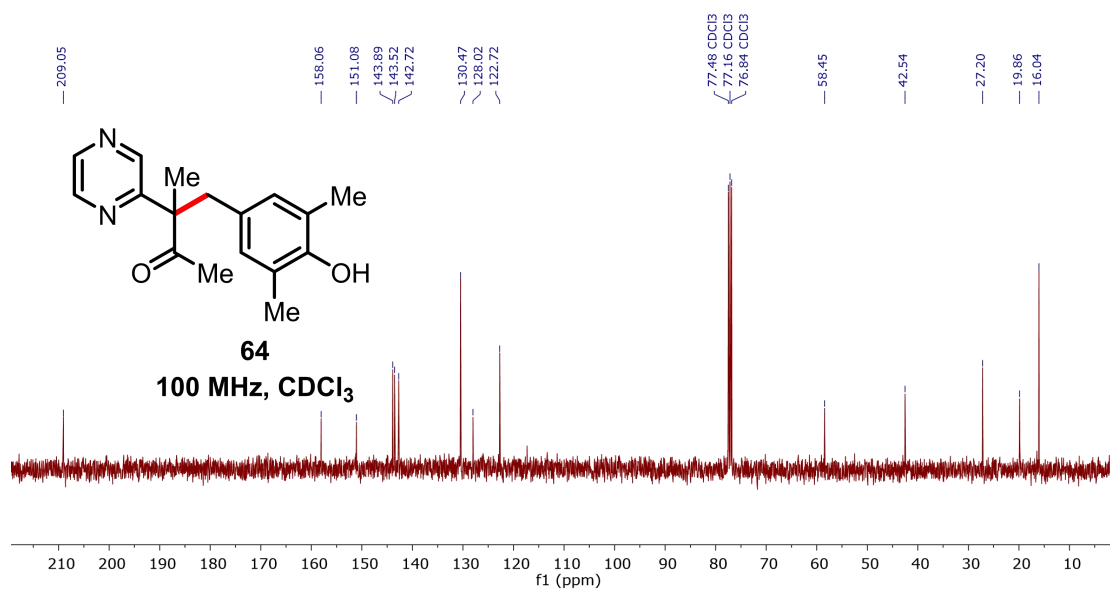



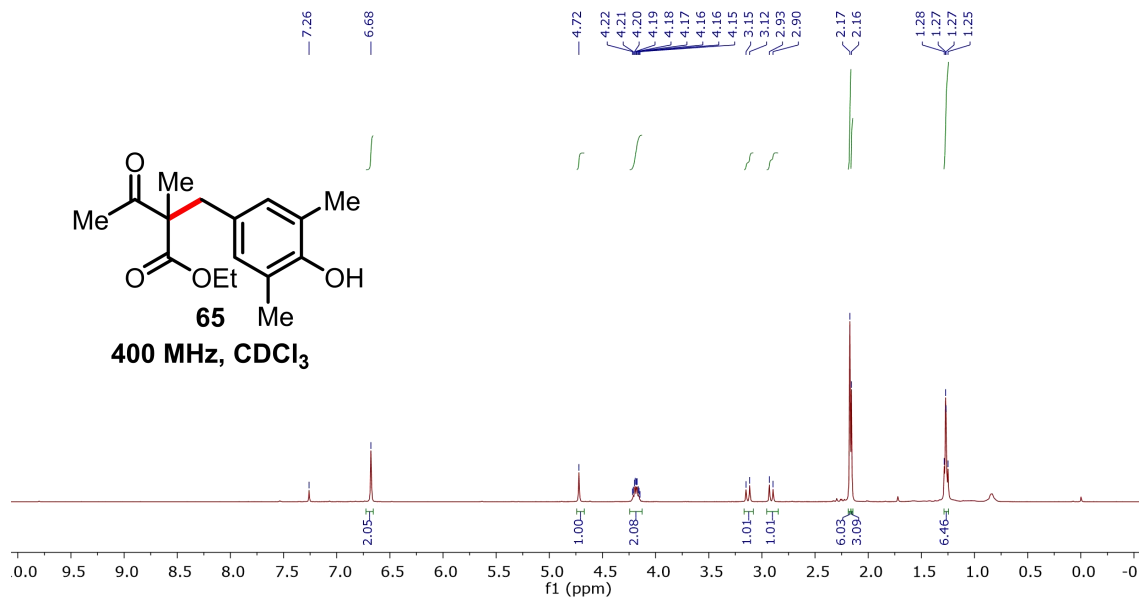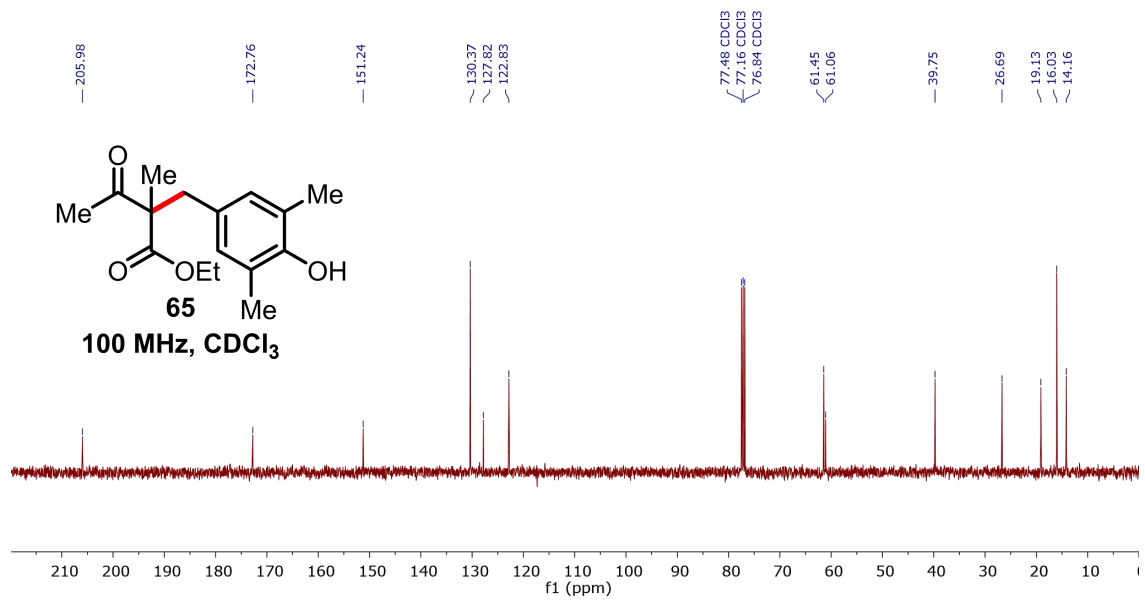

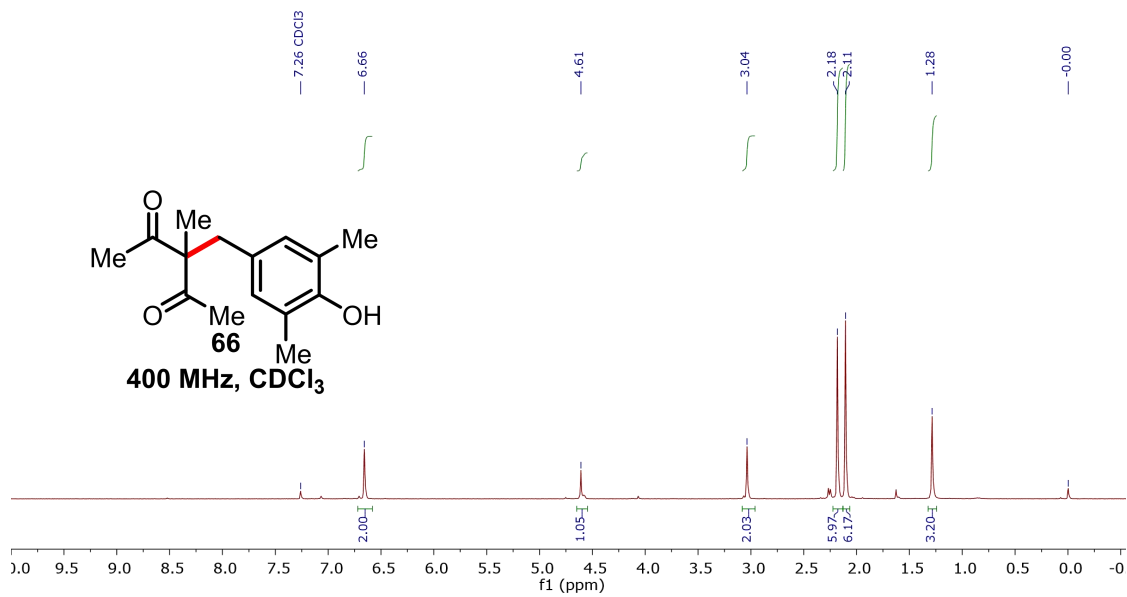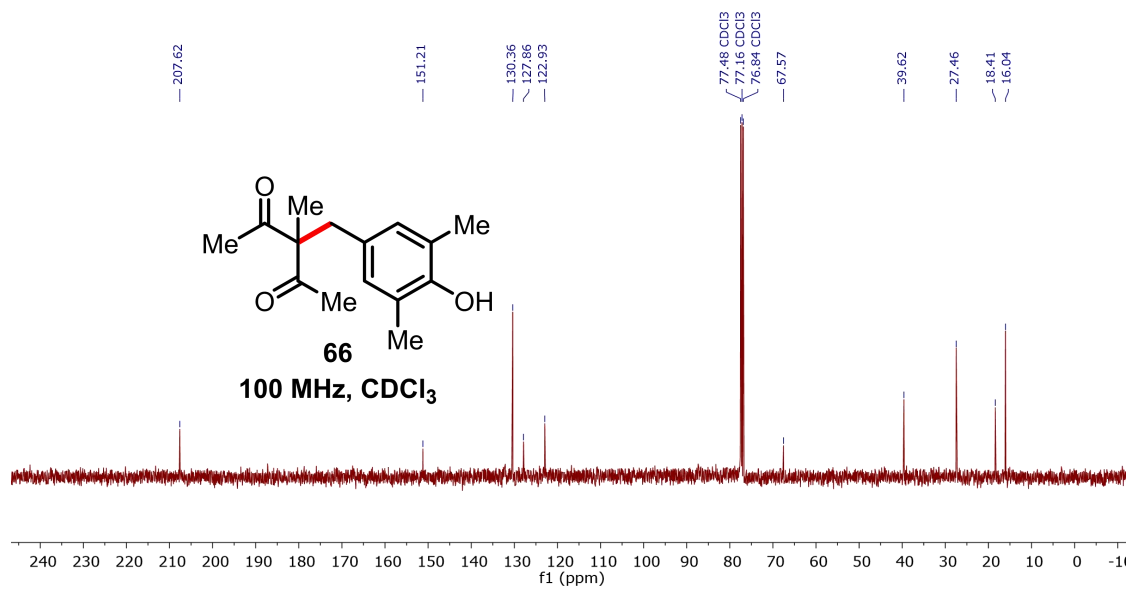

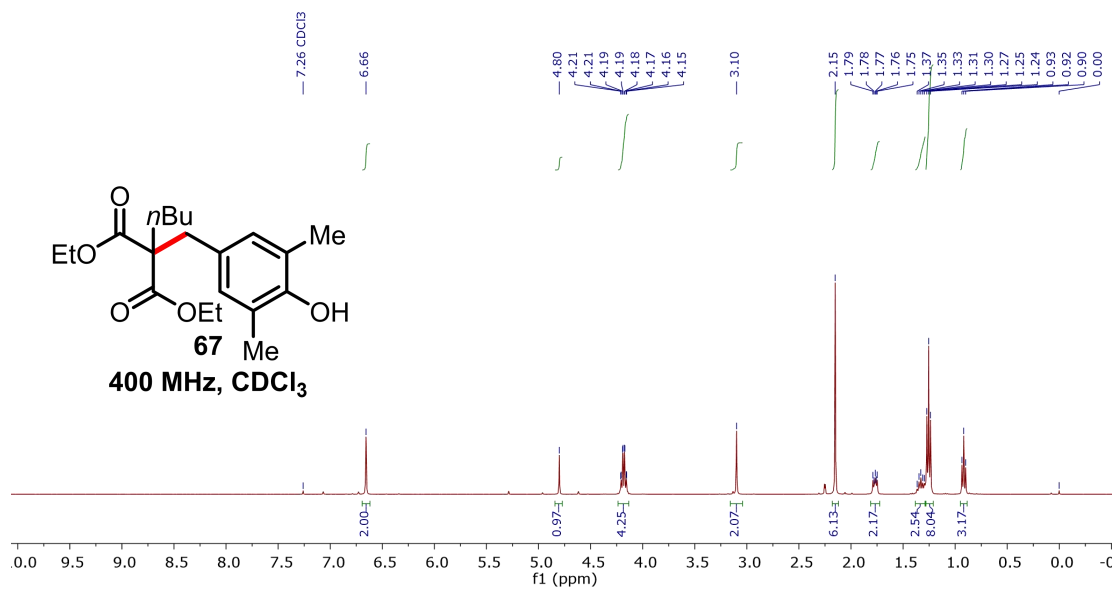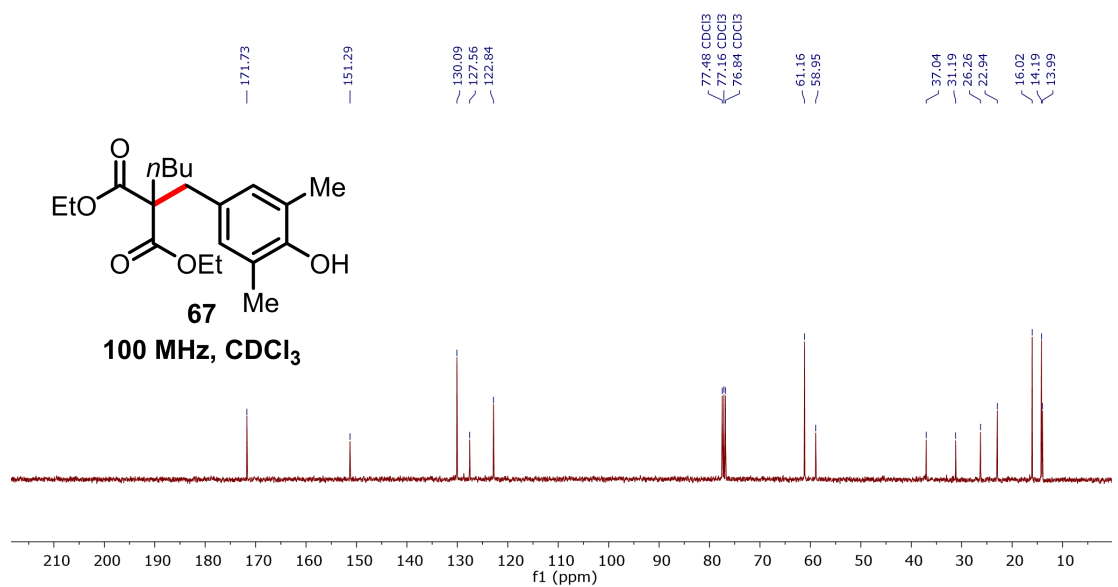

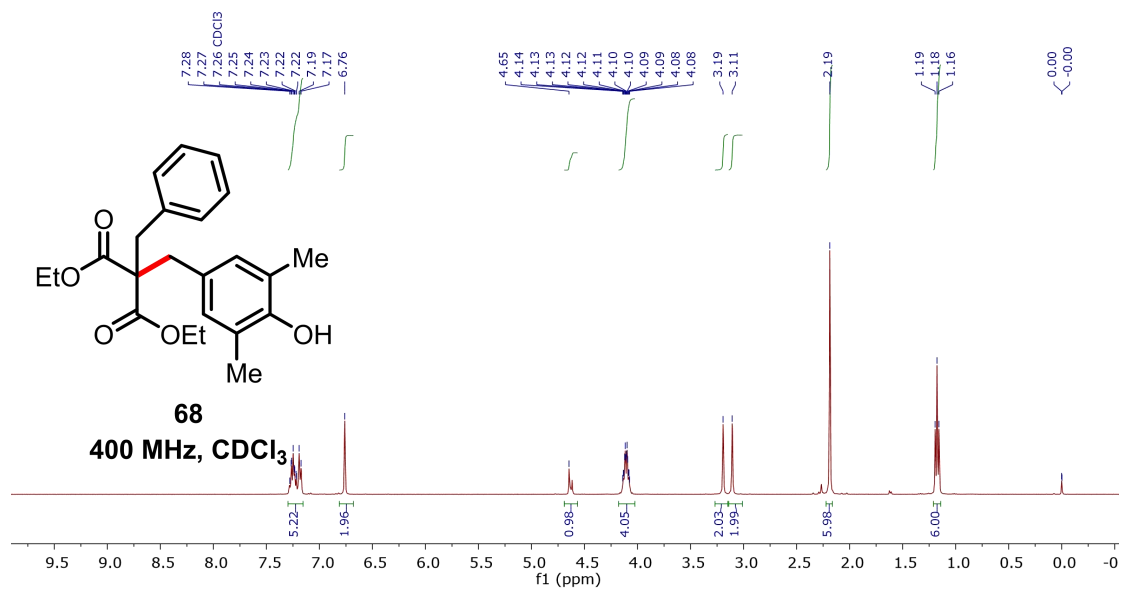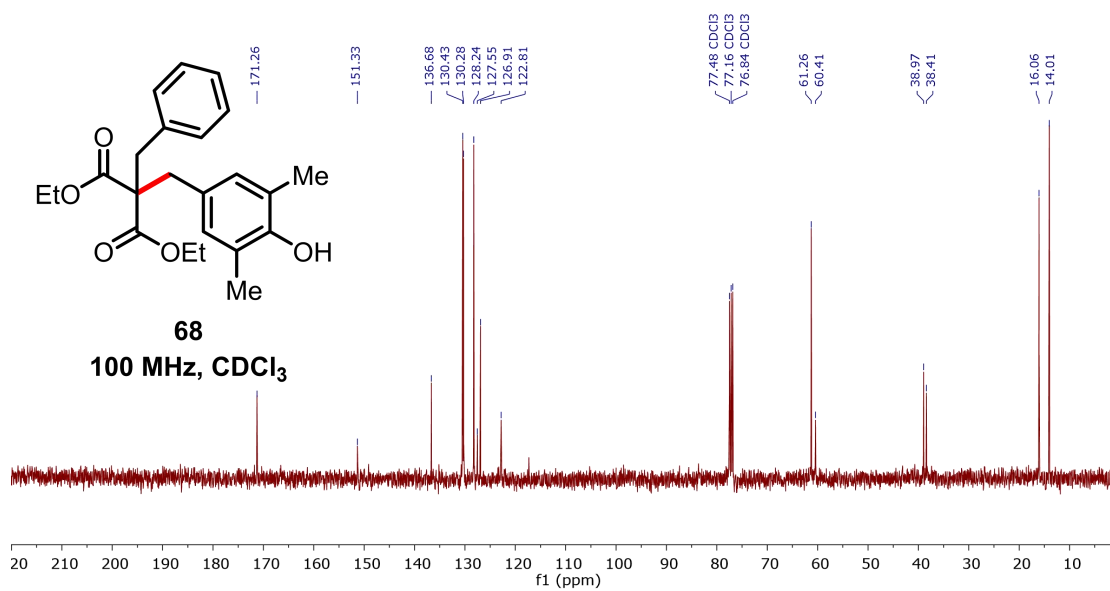

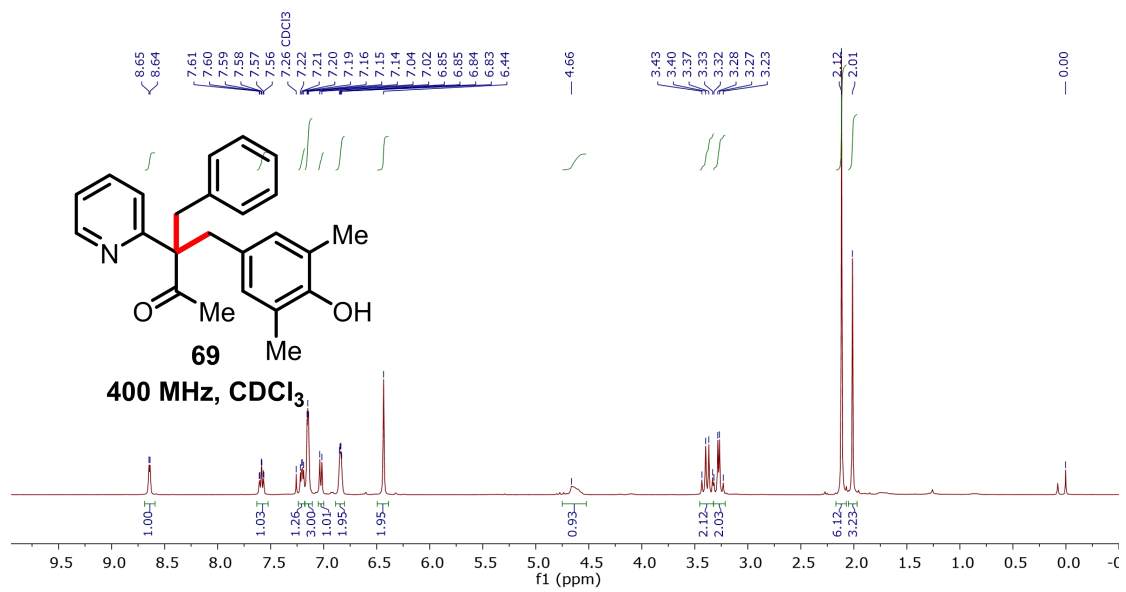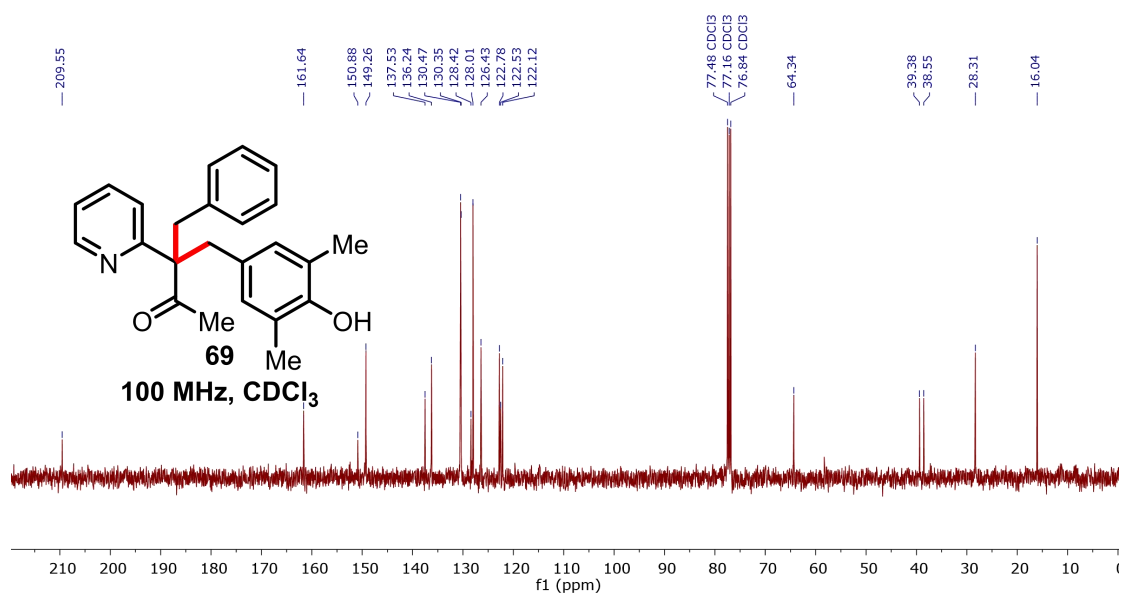

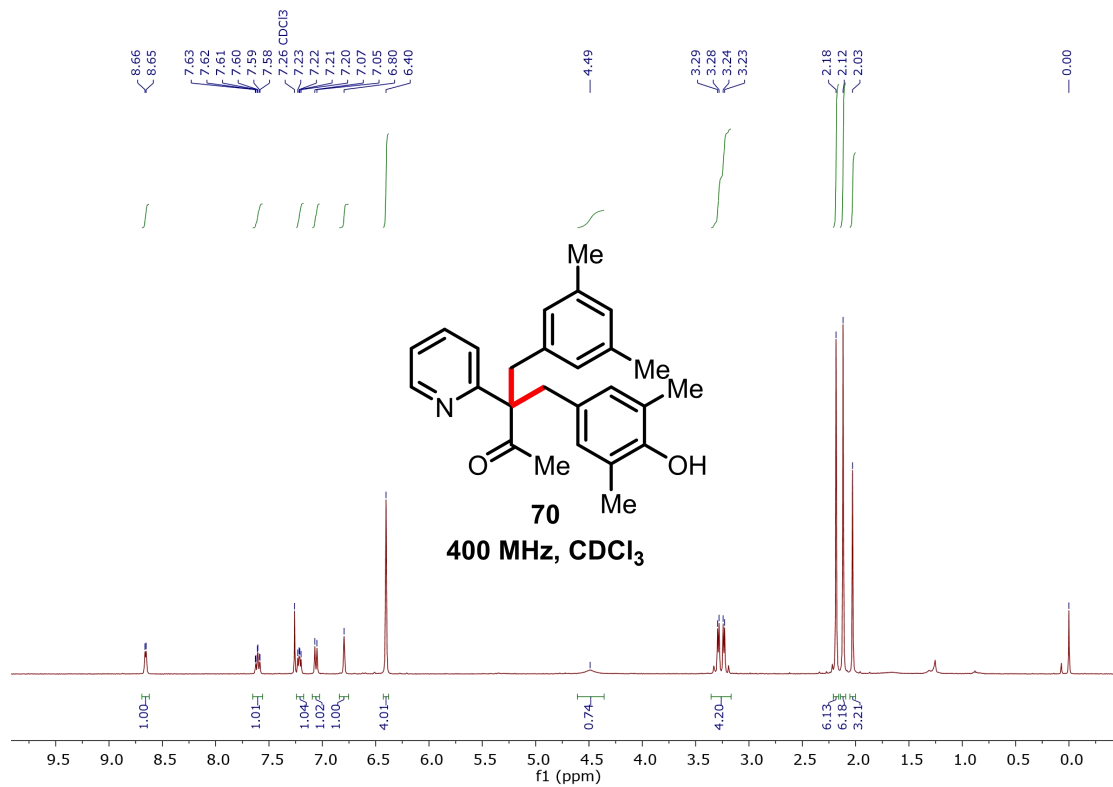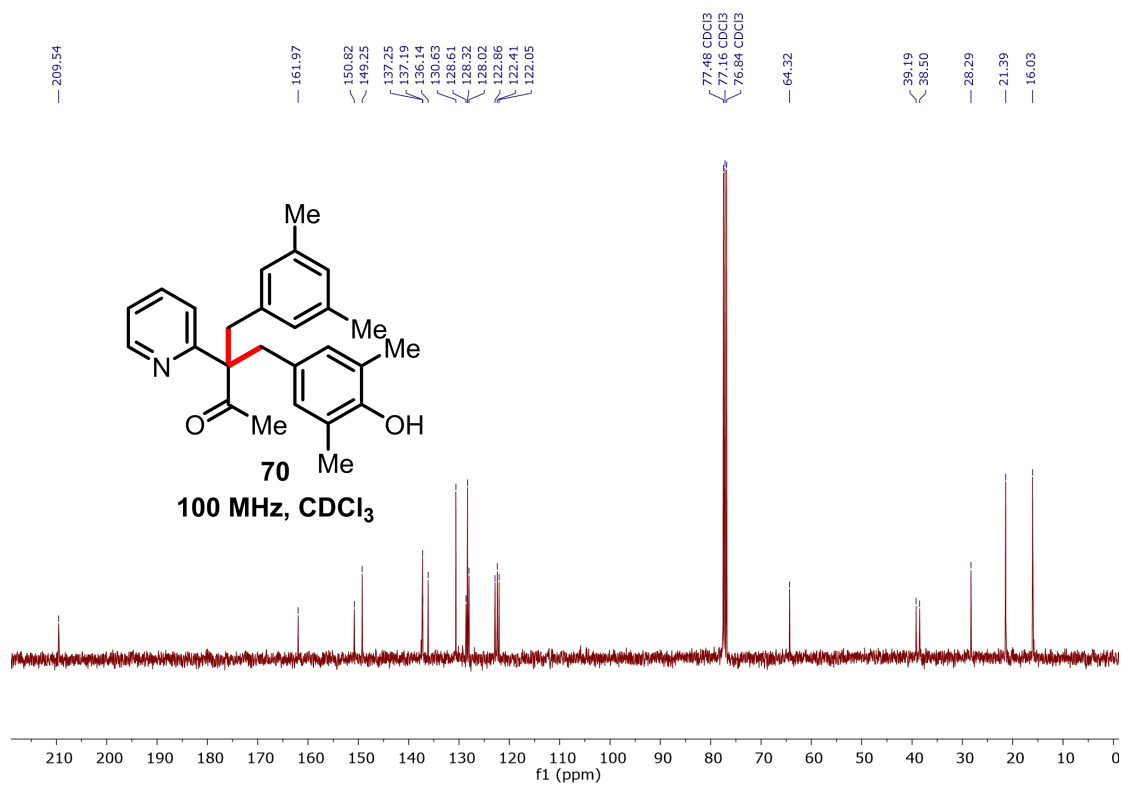

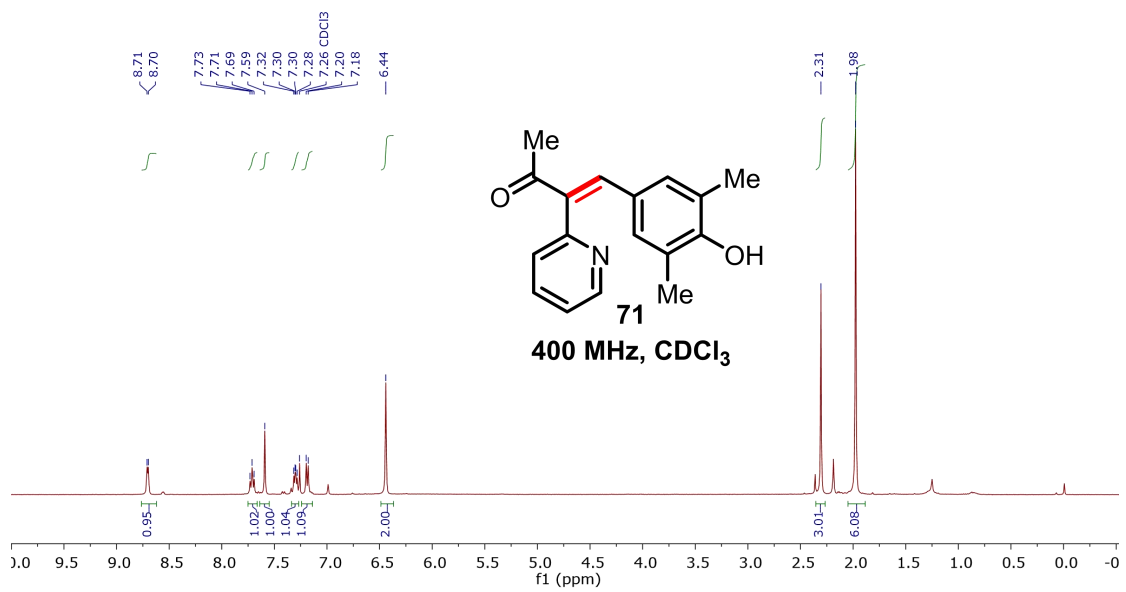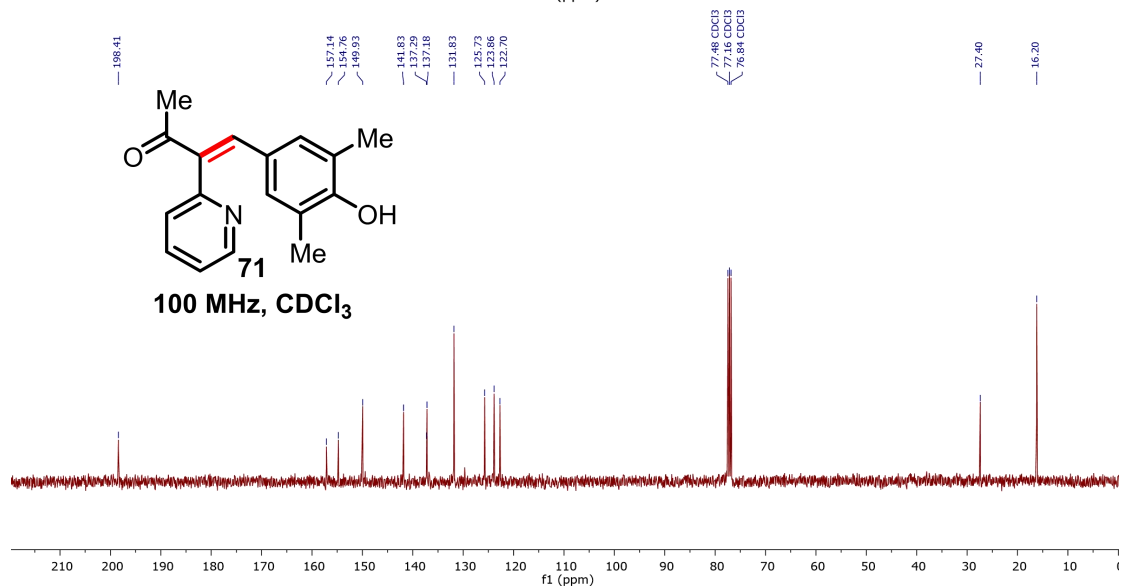

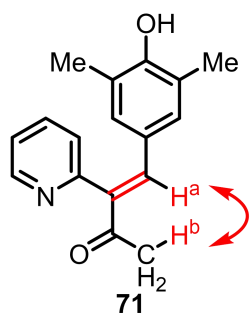

71  
100 MHz, CDCl<sub>3</sub>

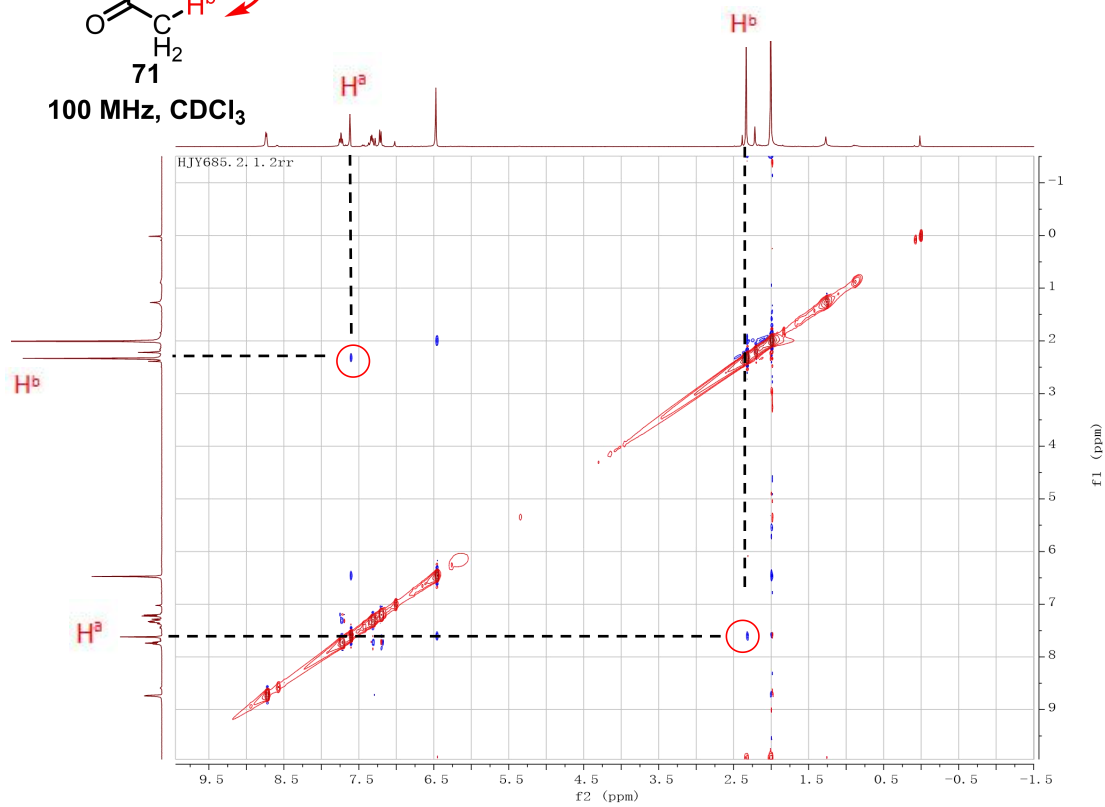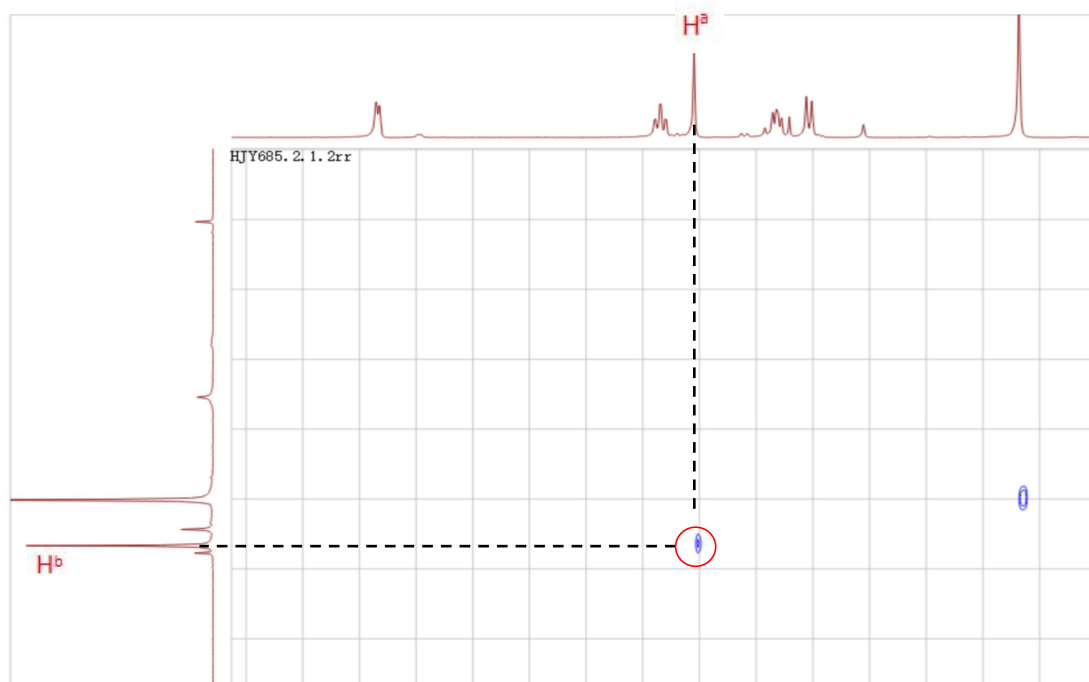



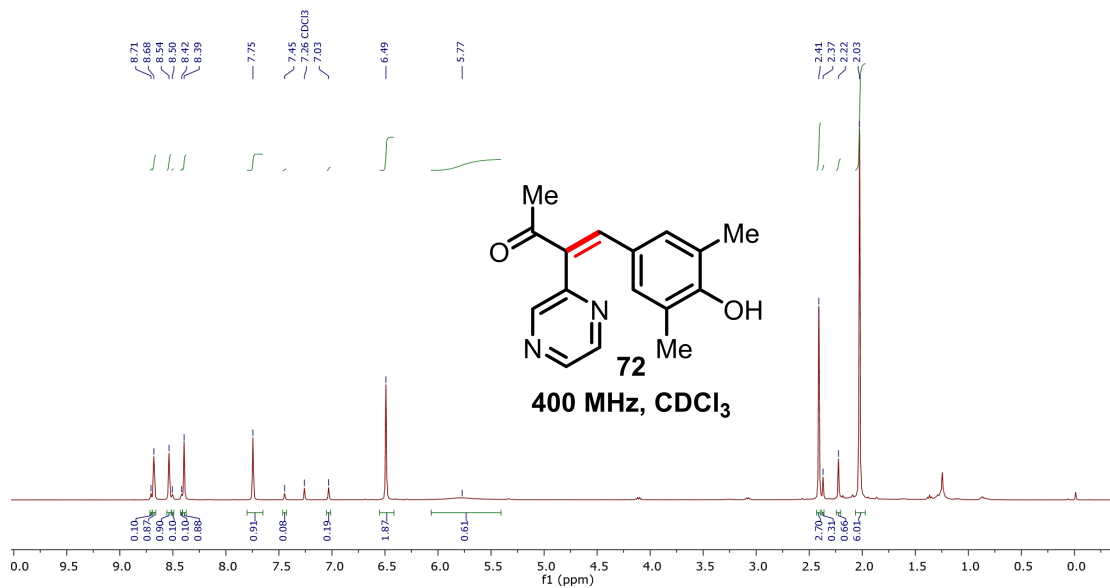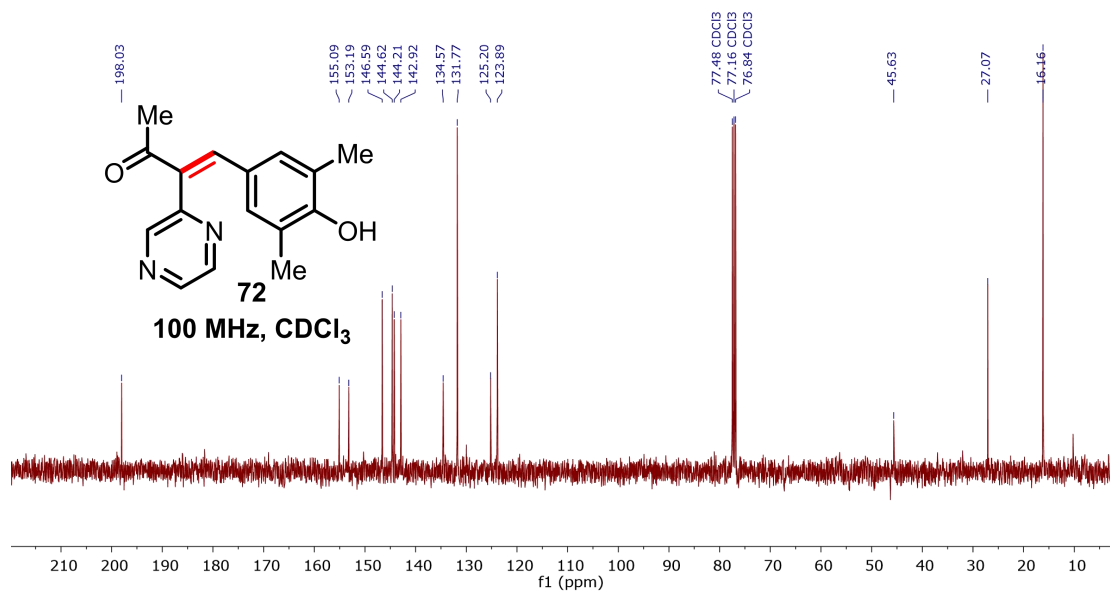

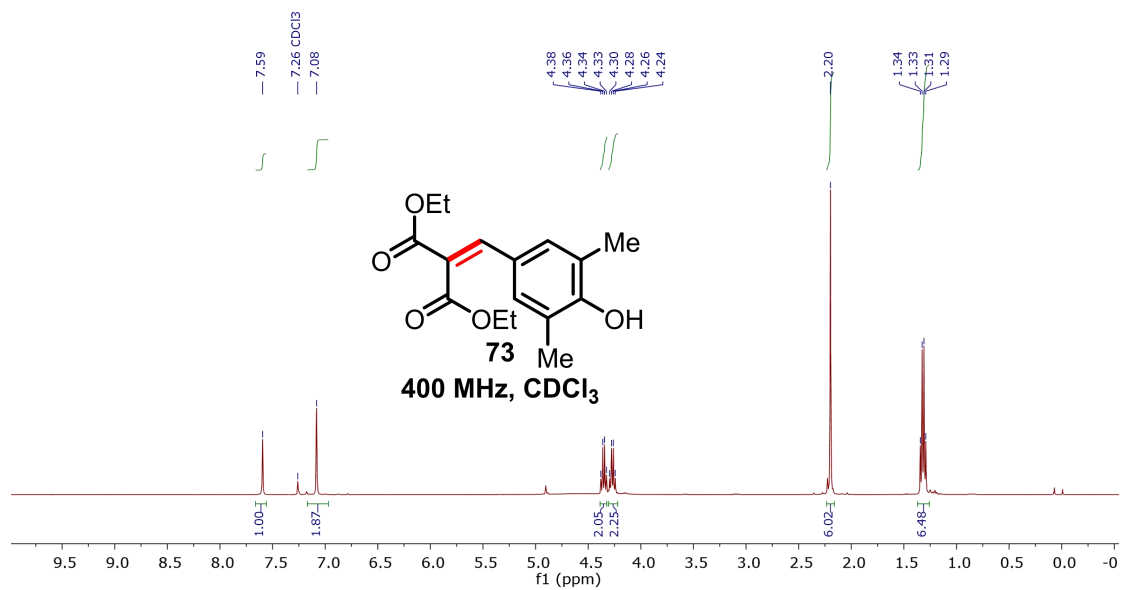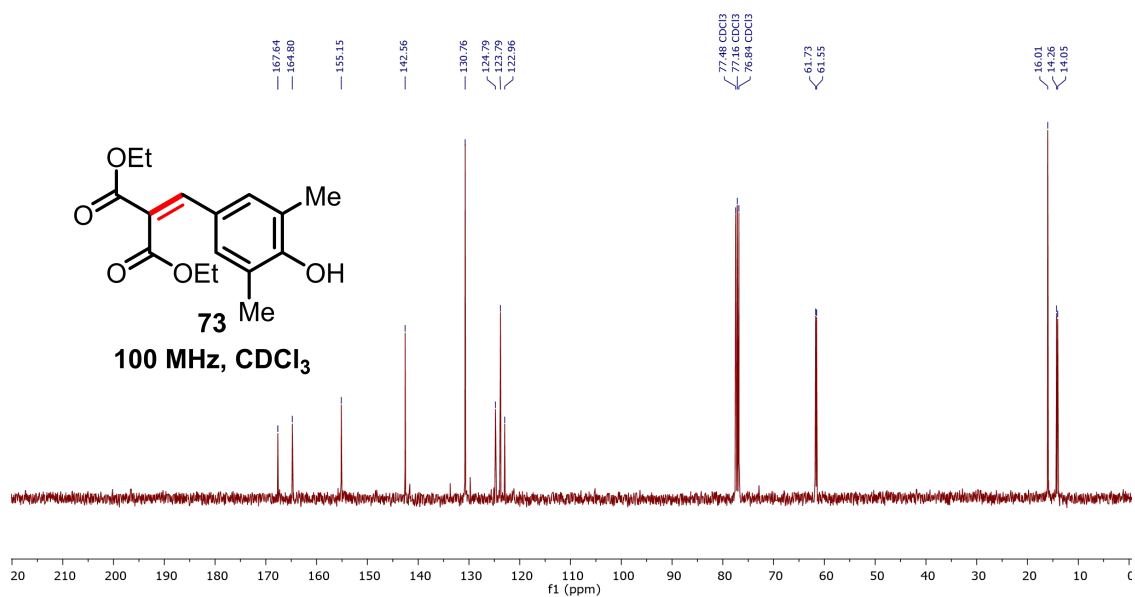

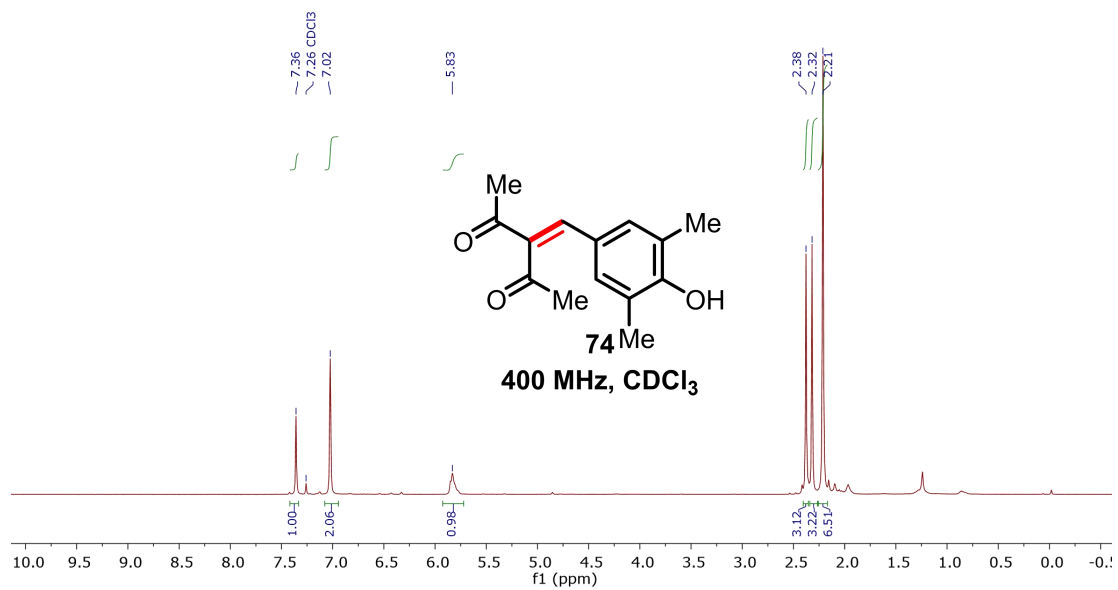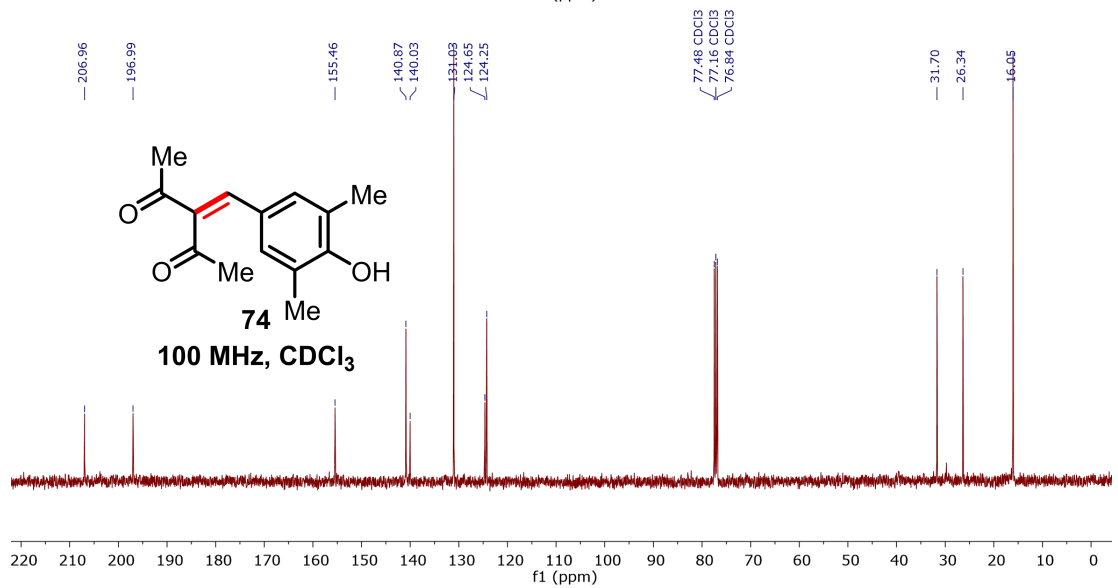

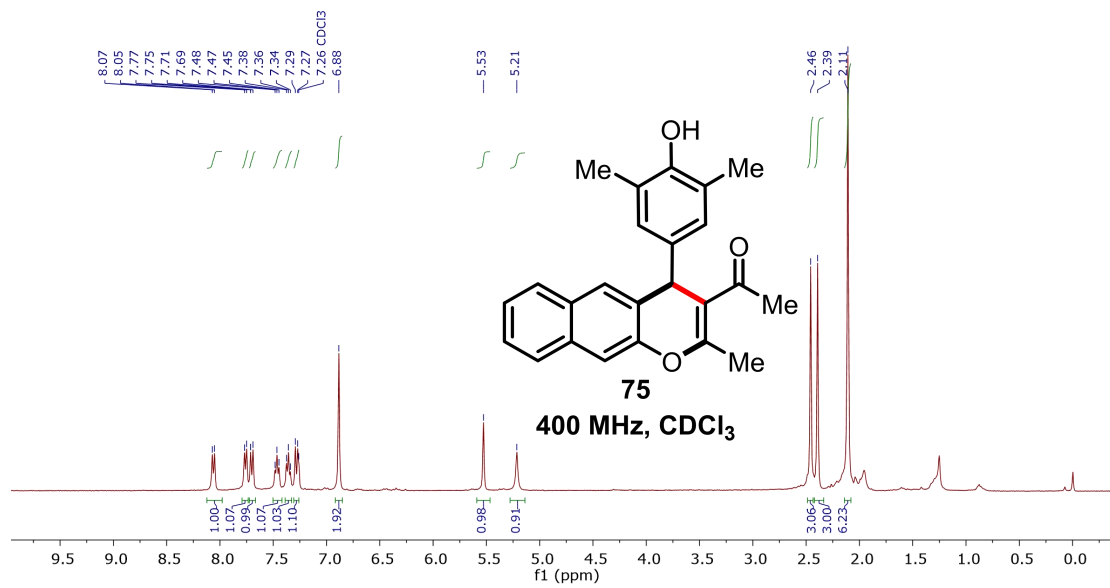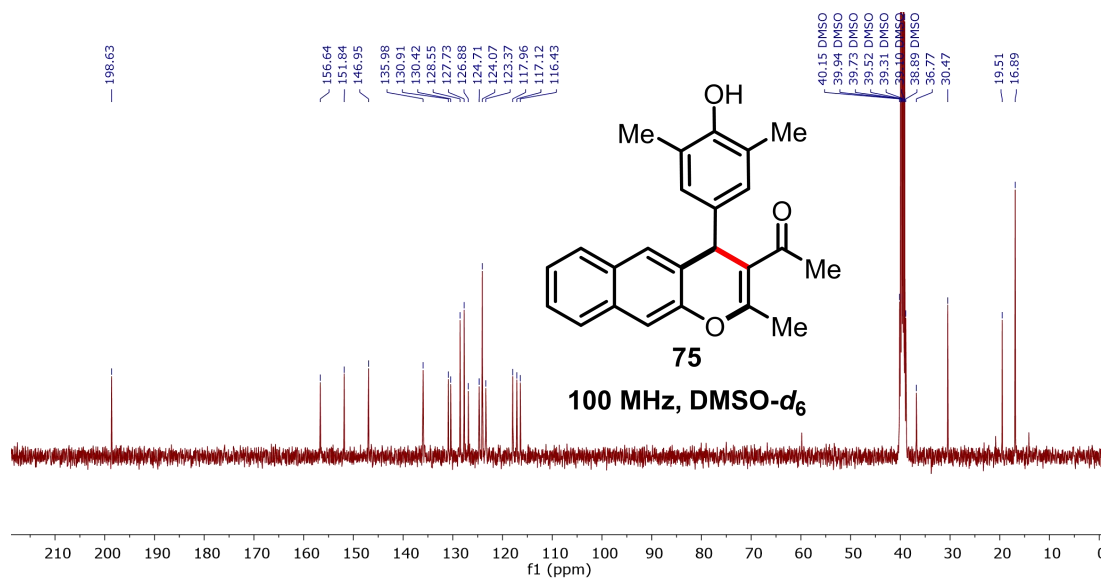

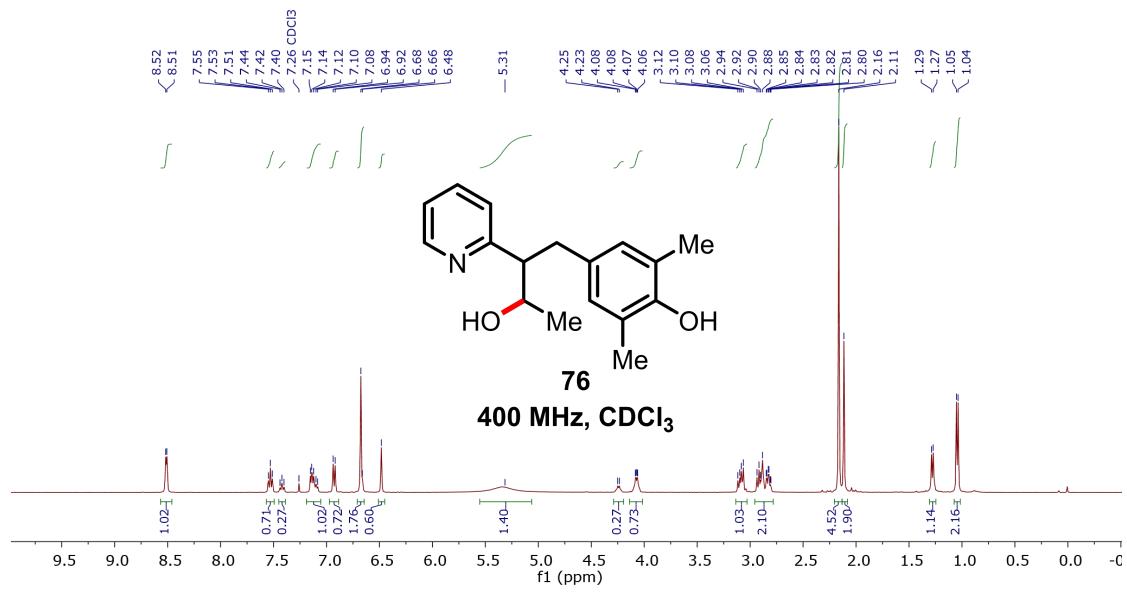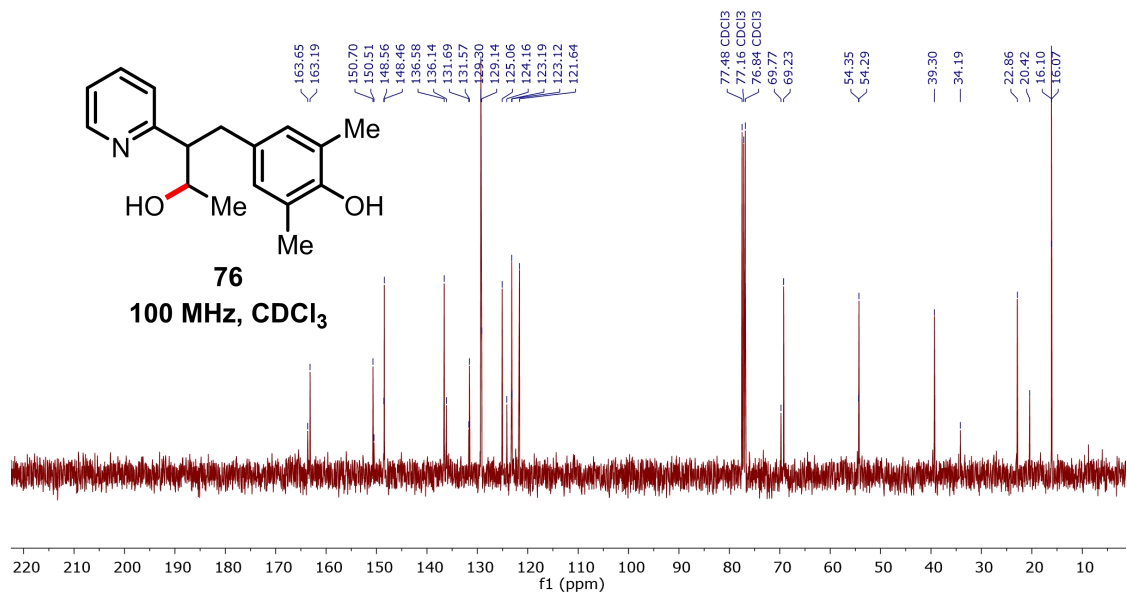

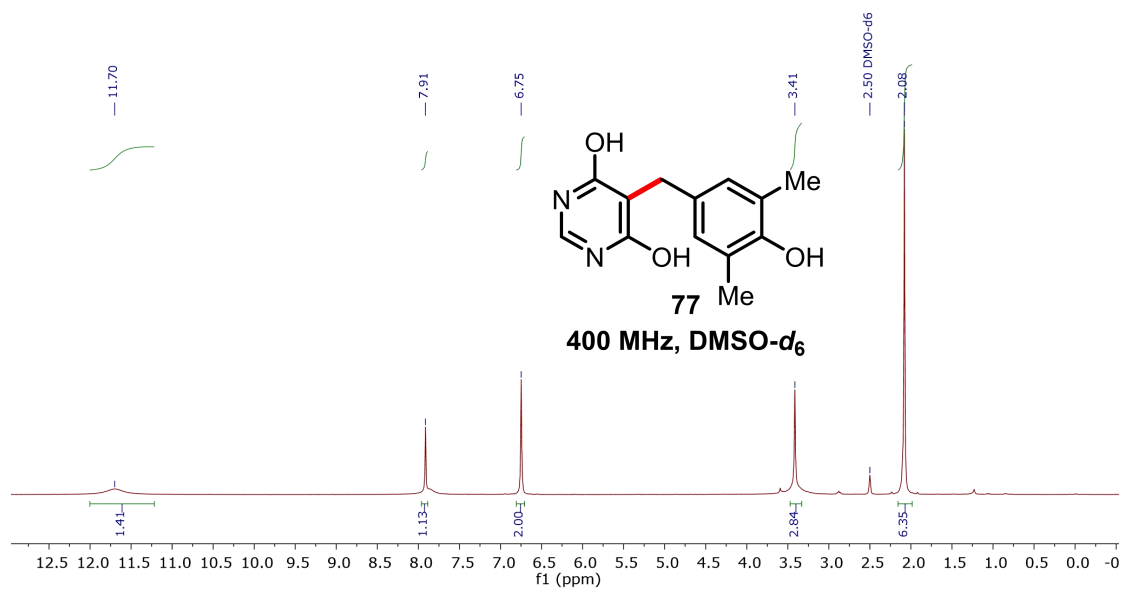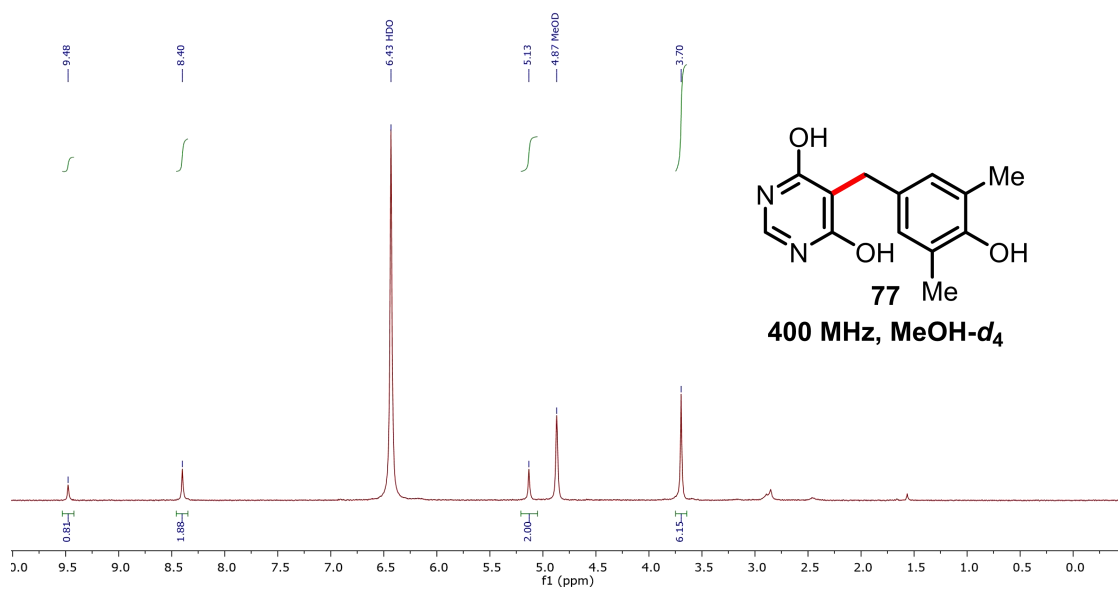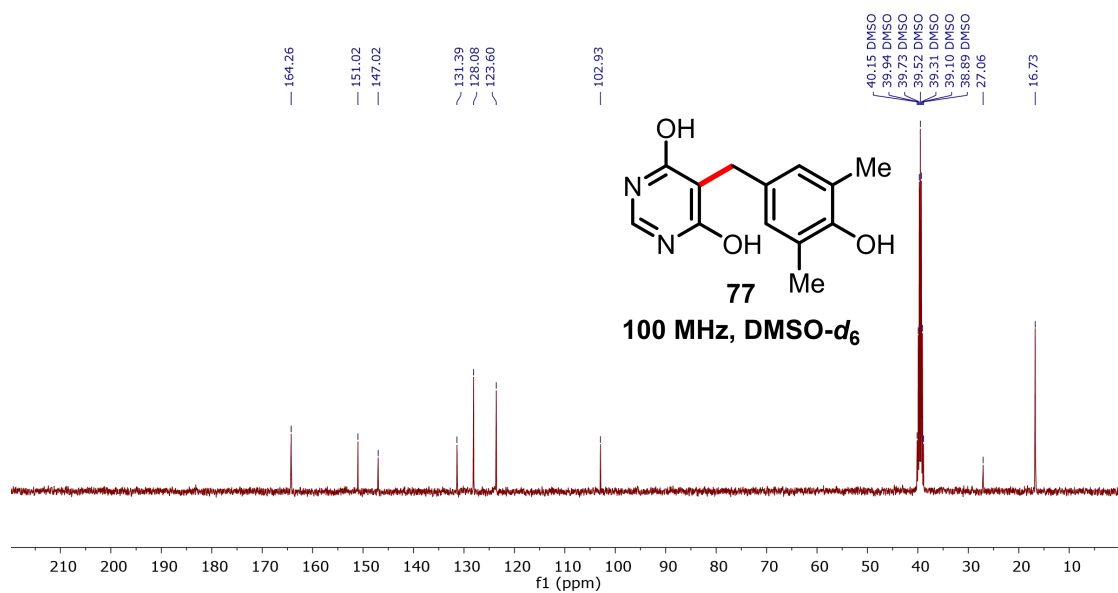

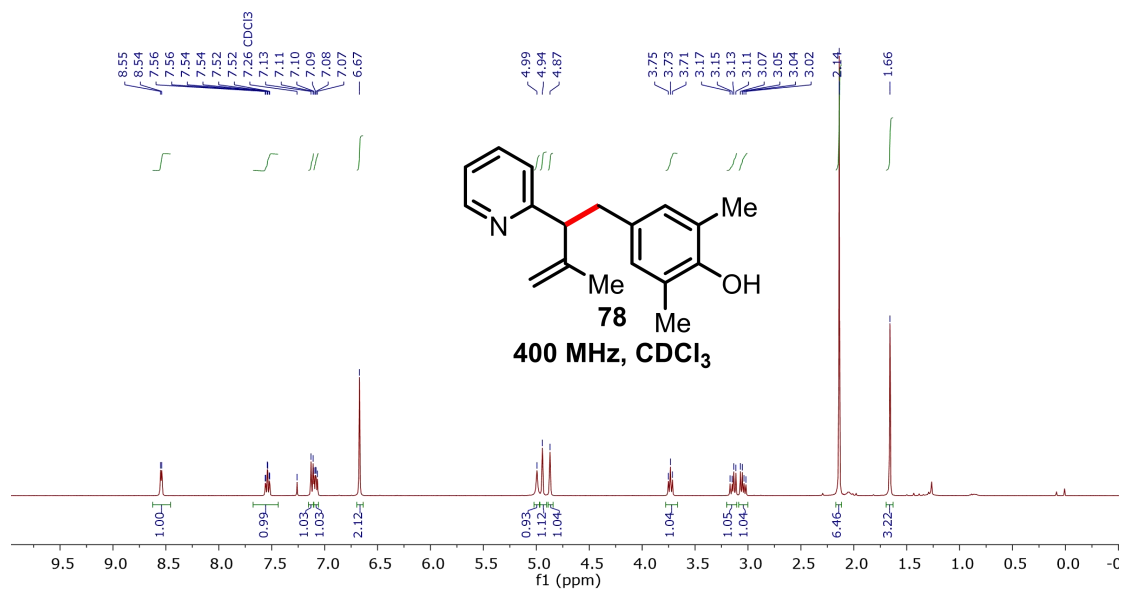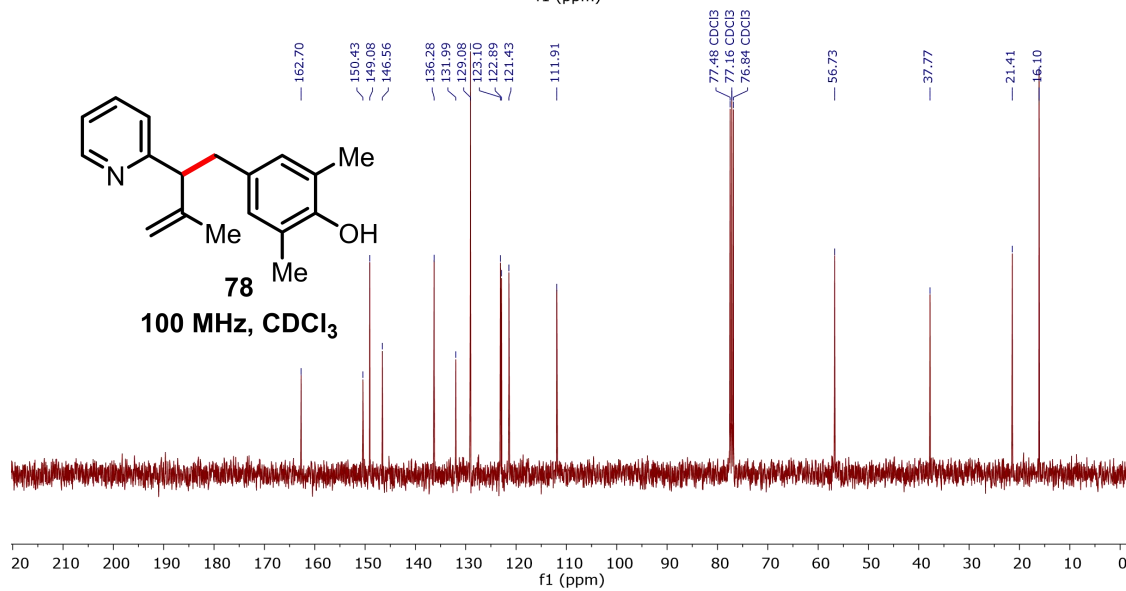

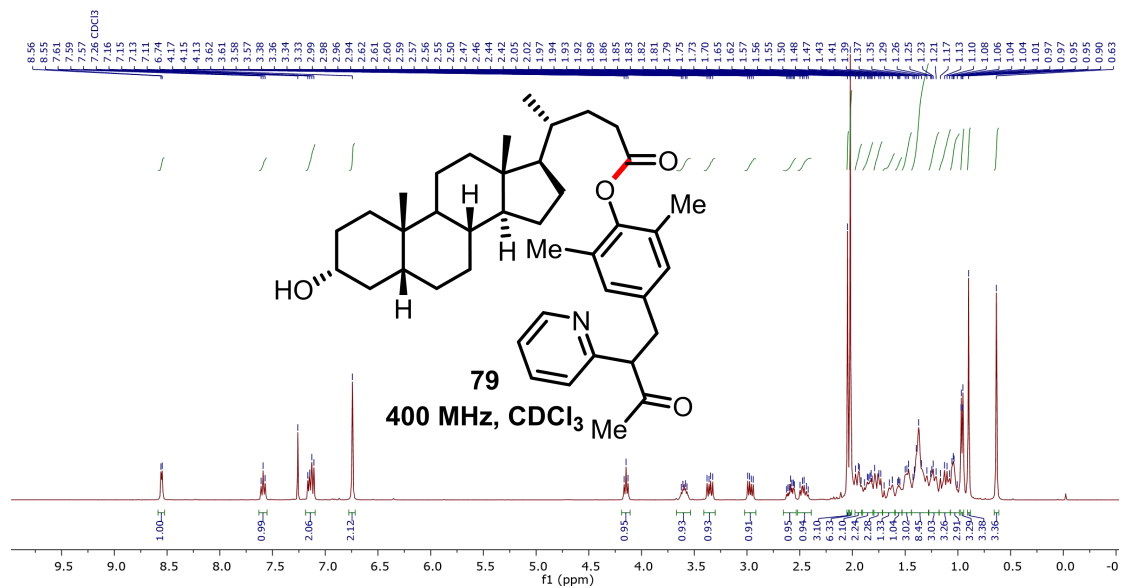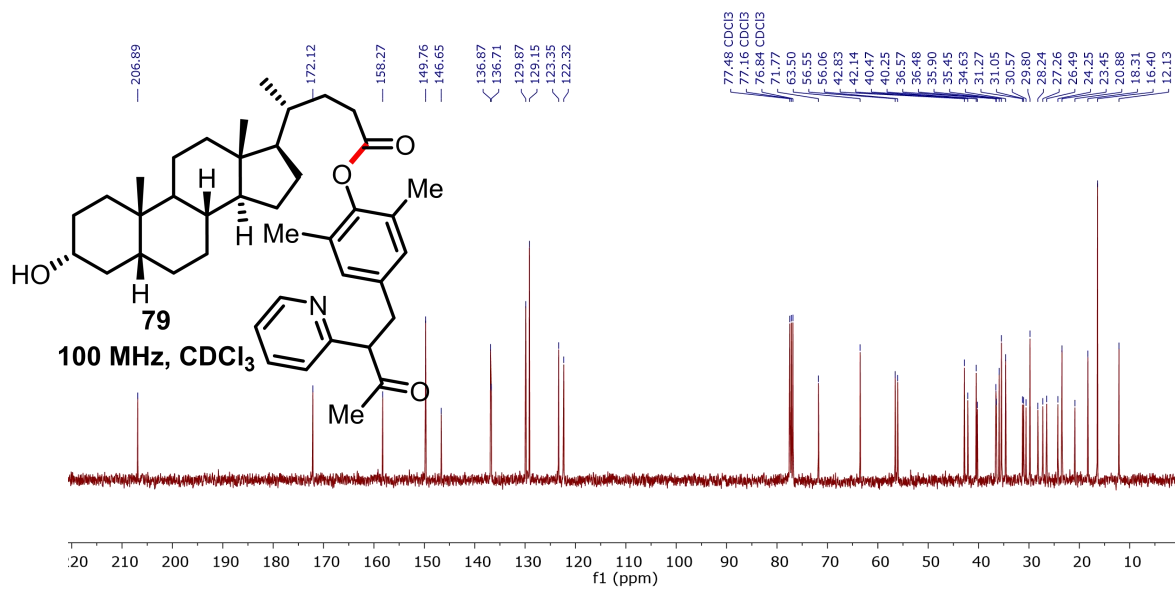



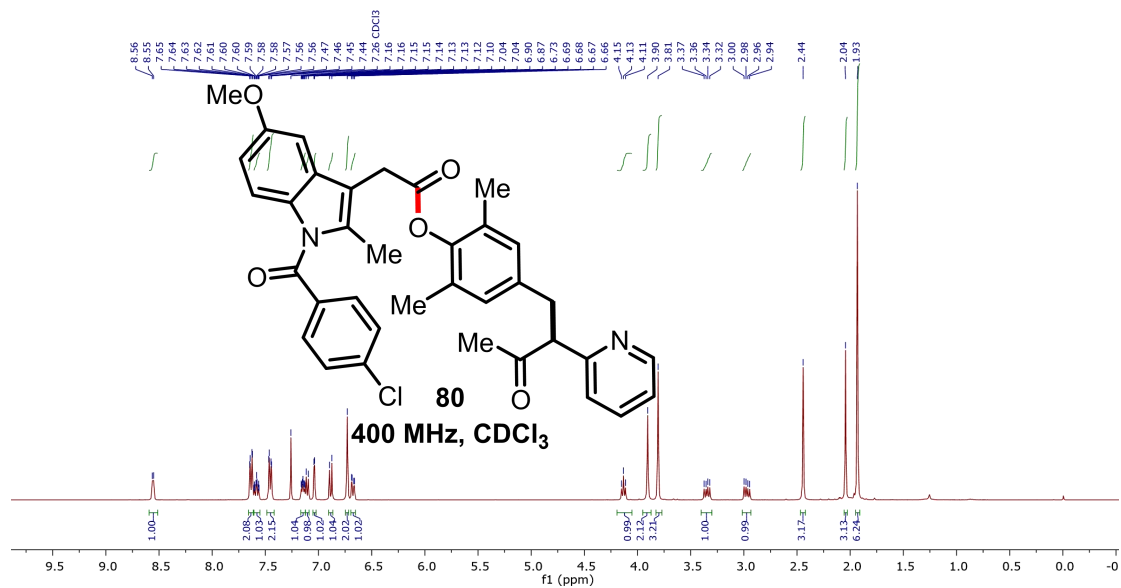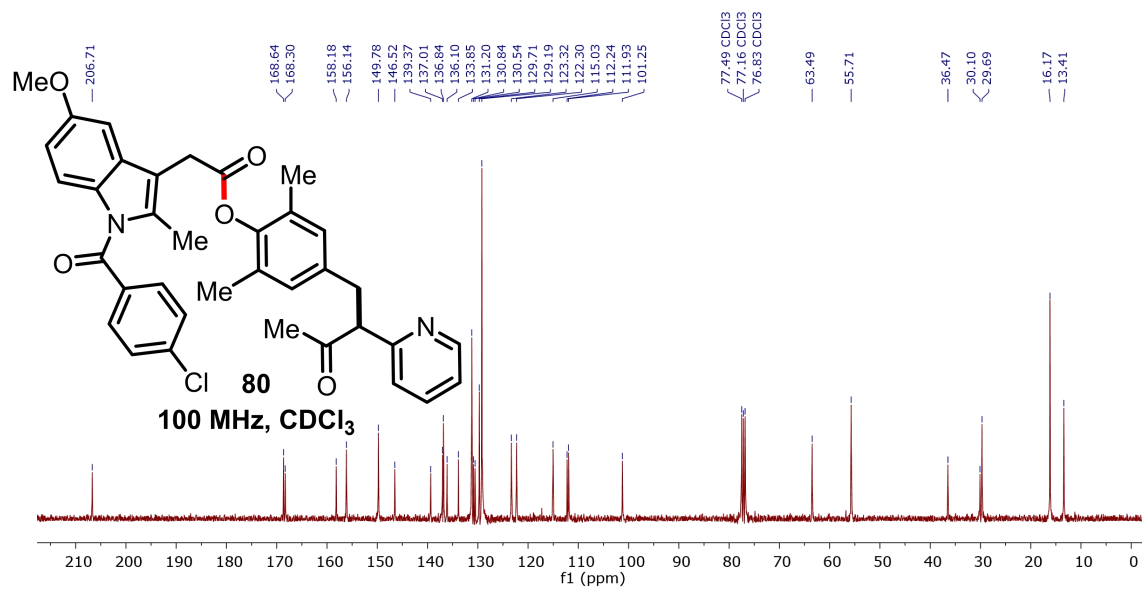

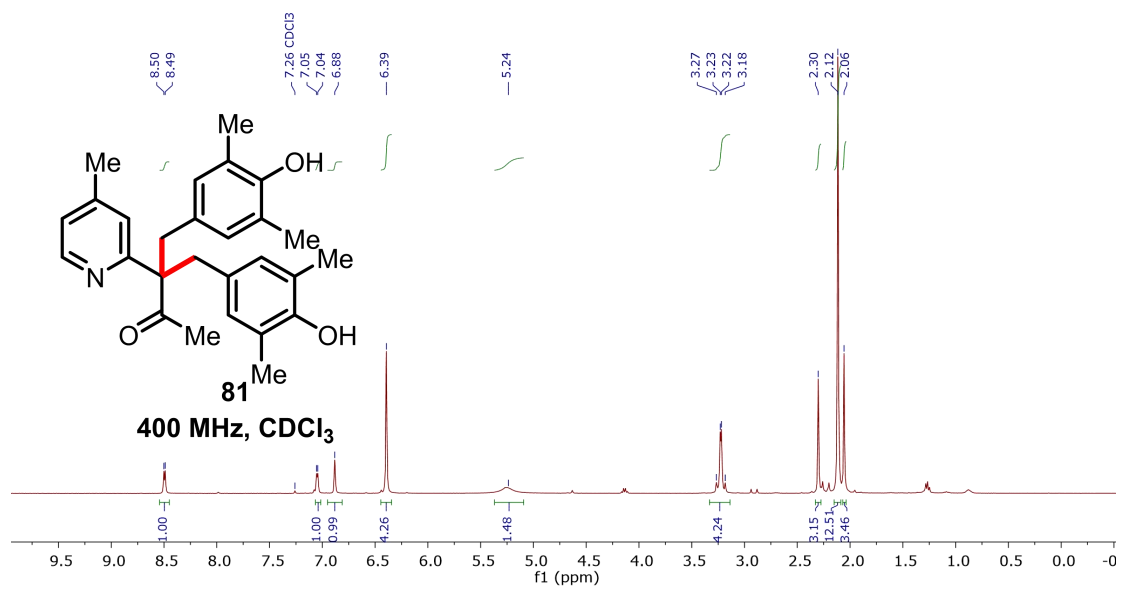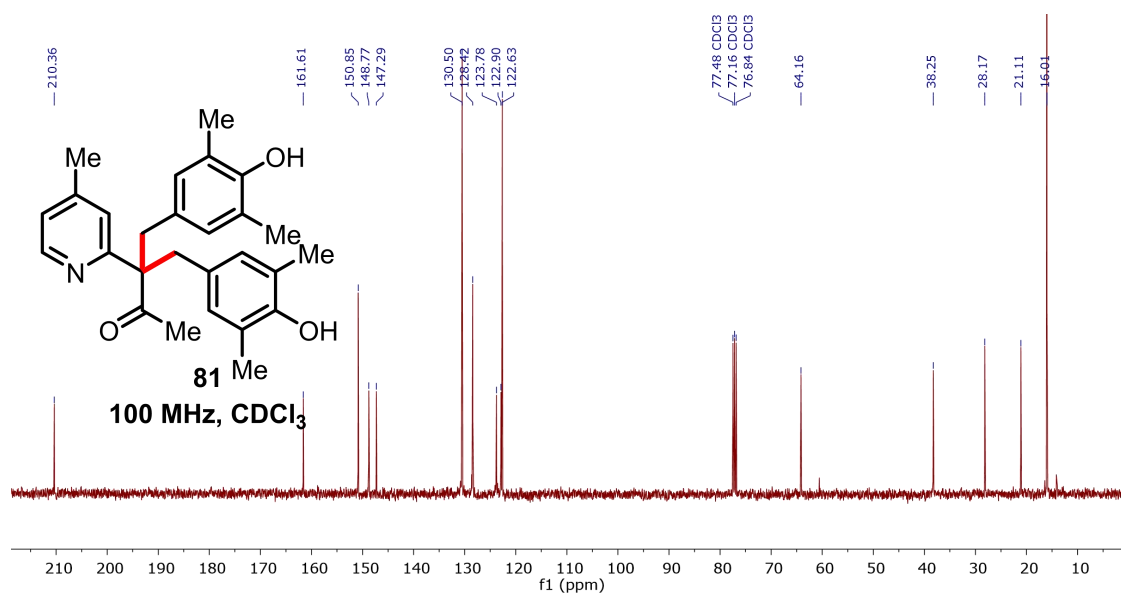

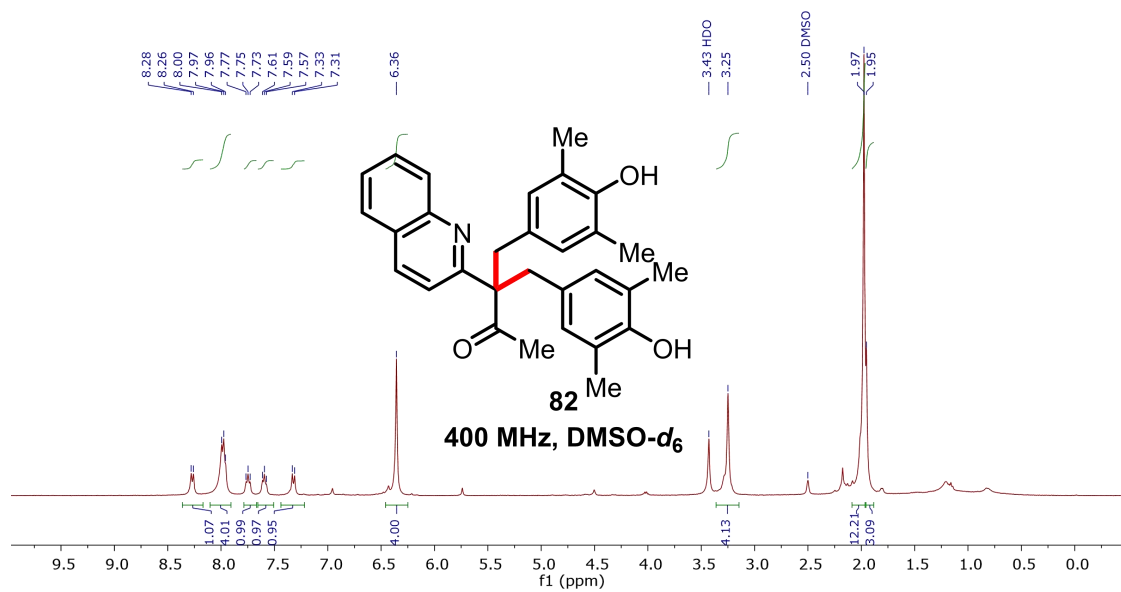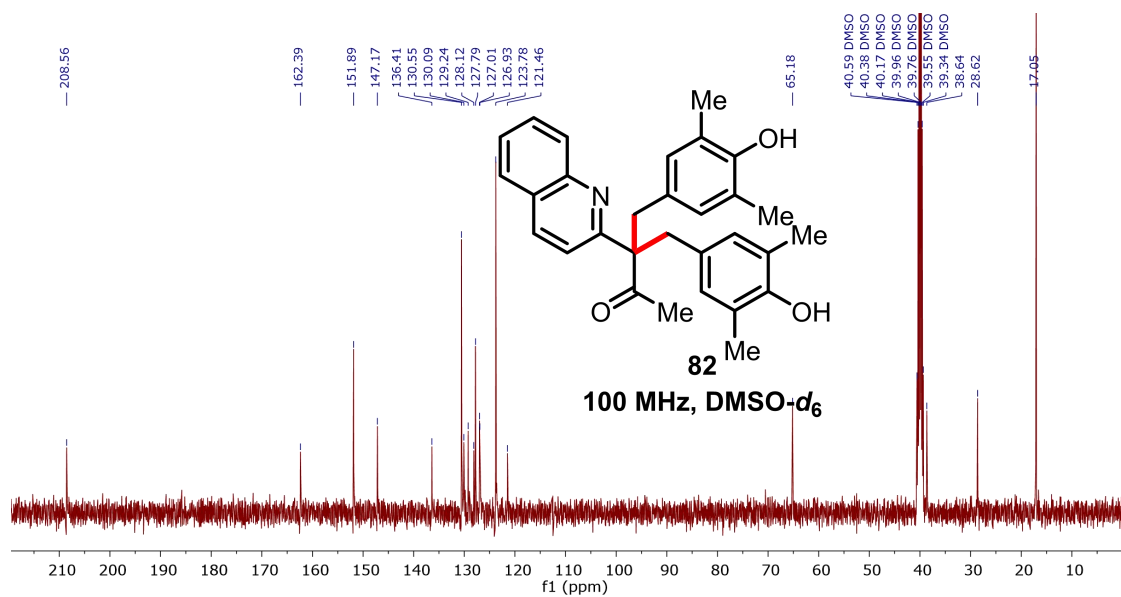

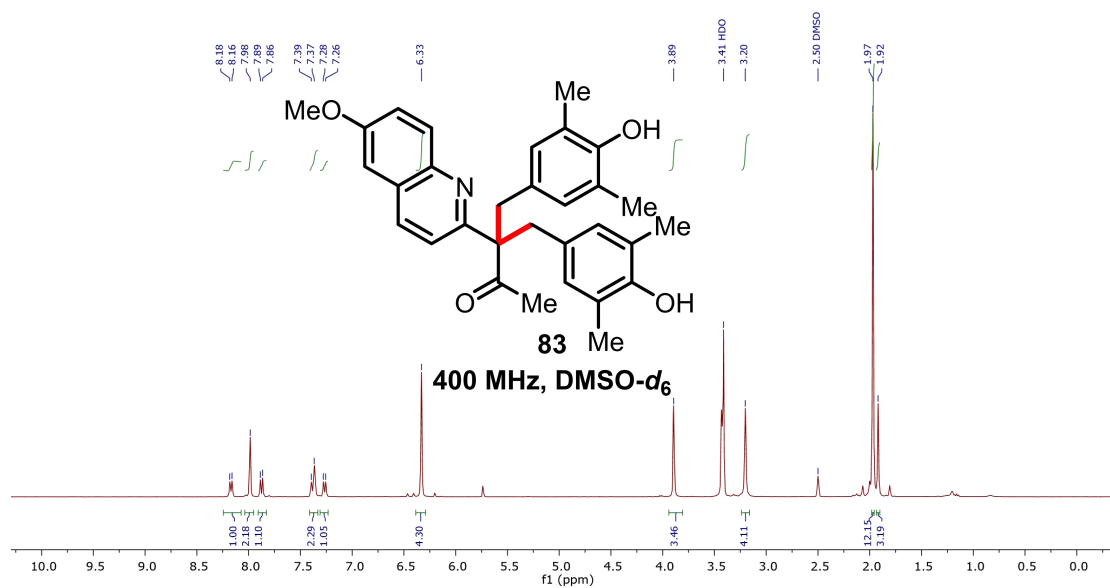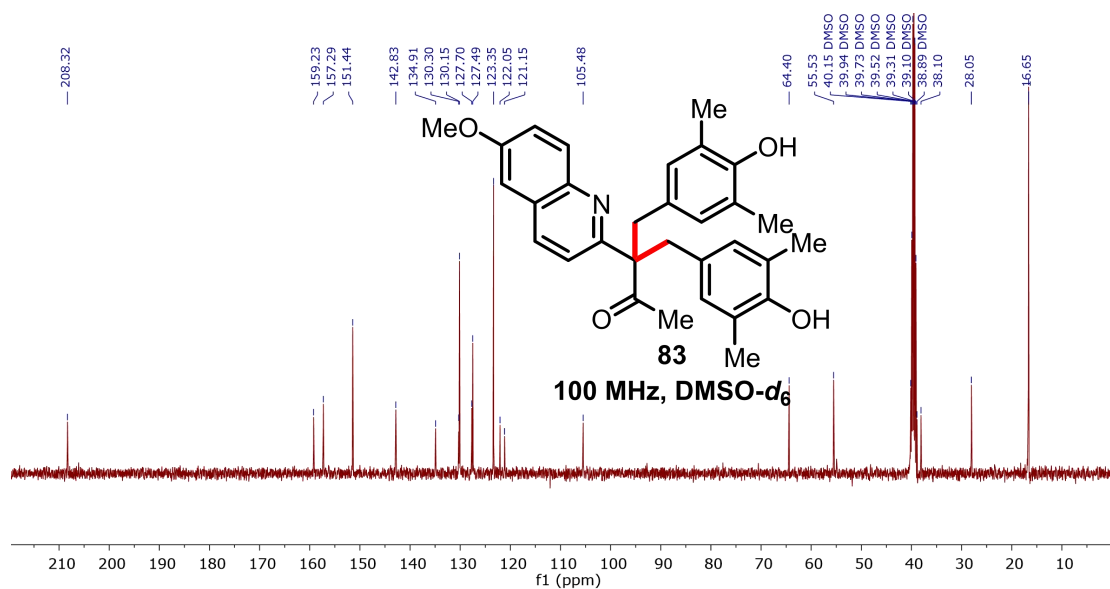

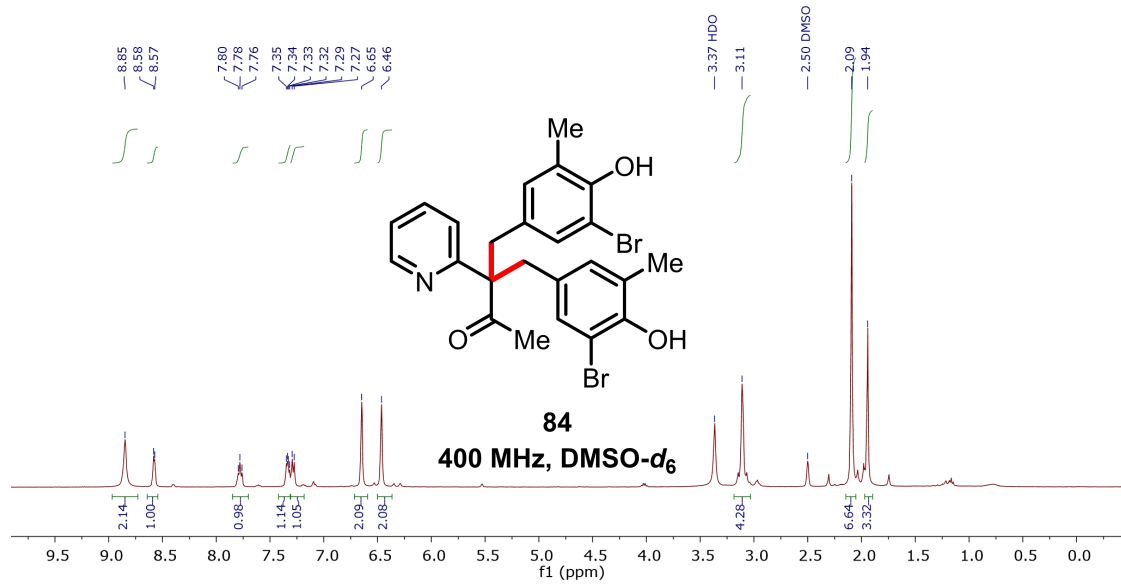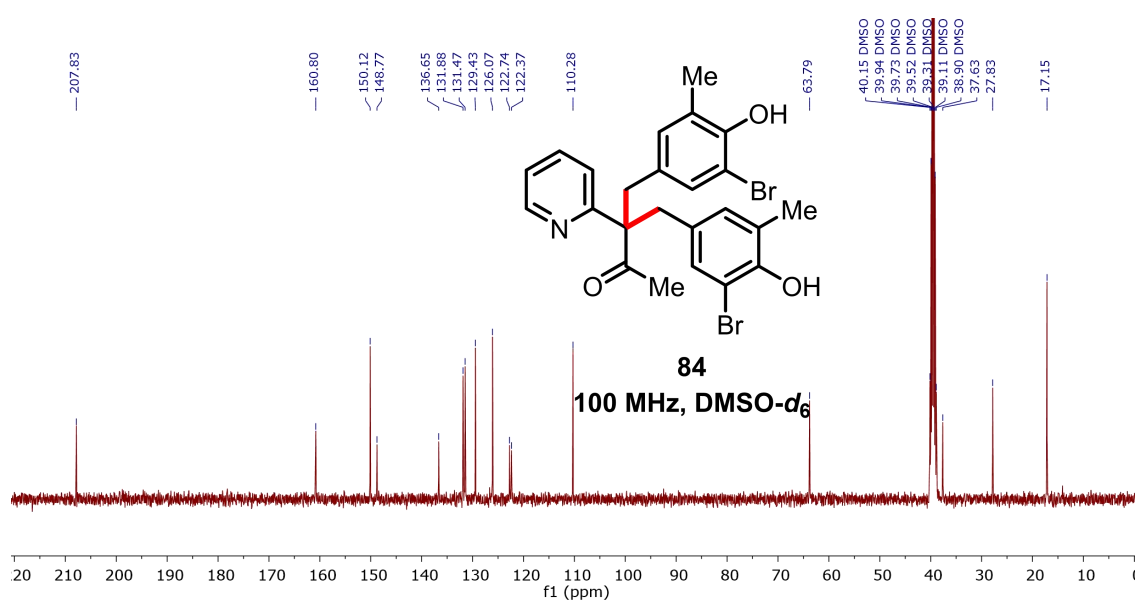

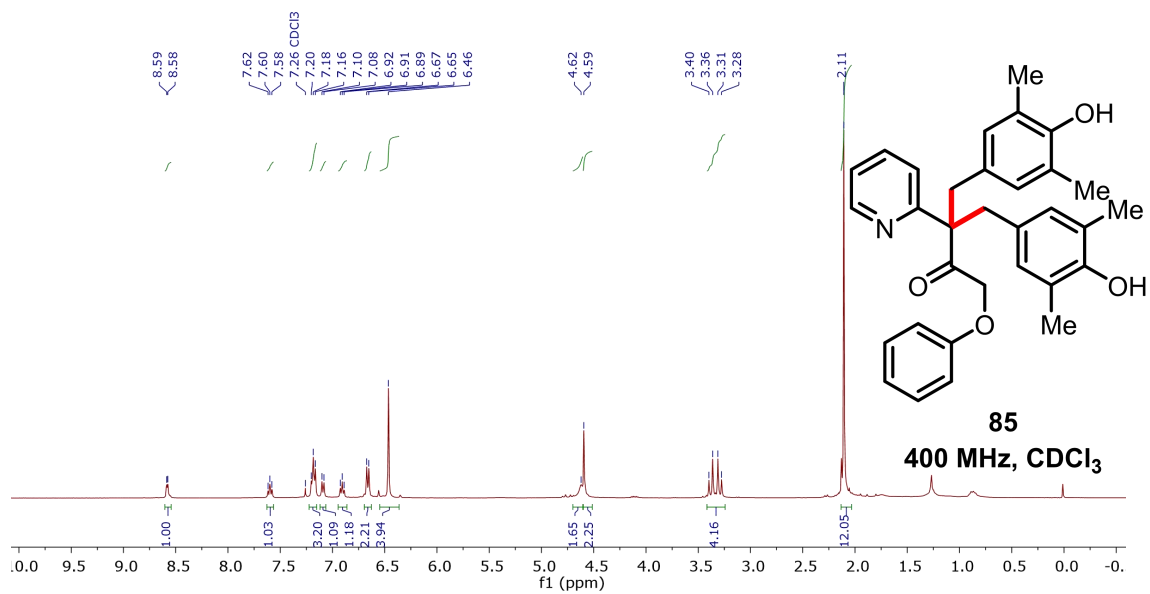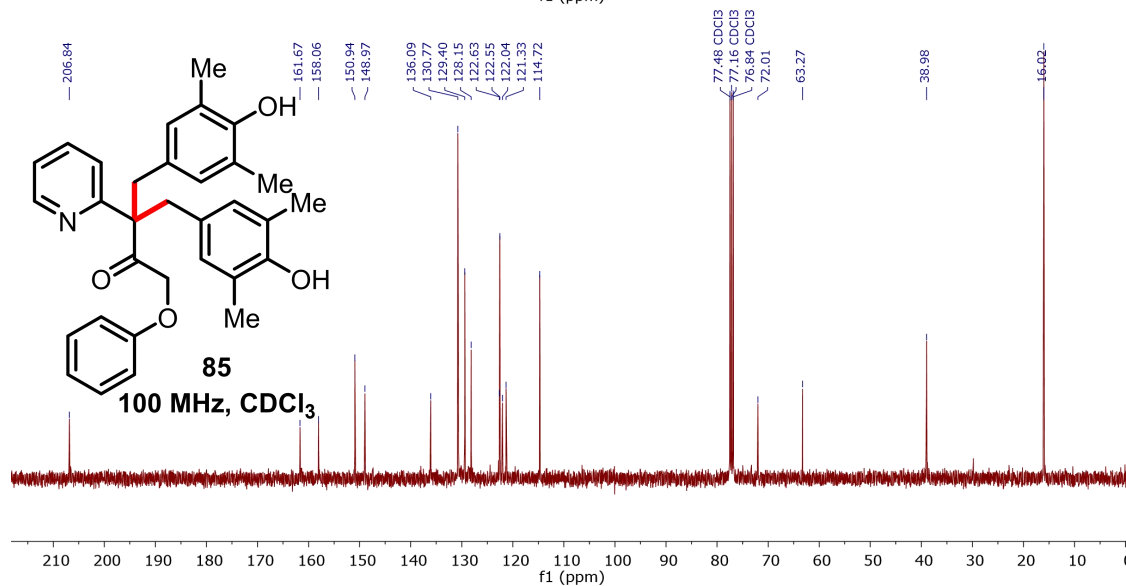

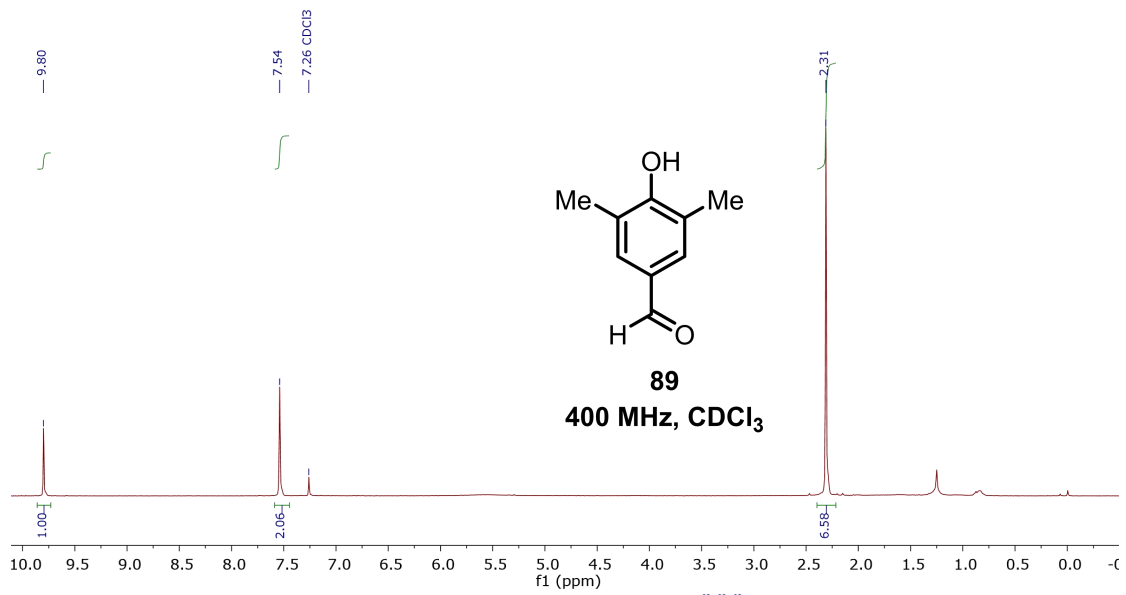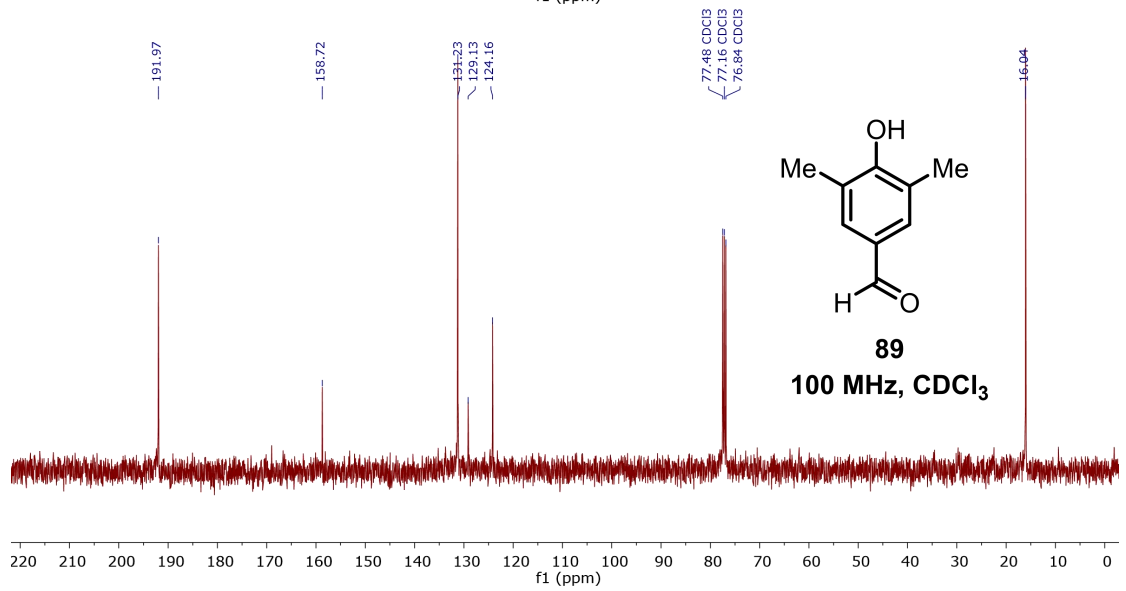

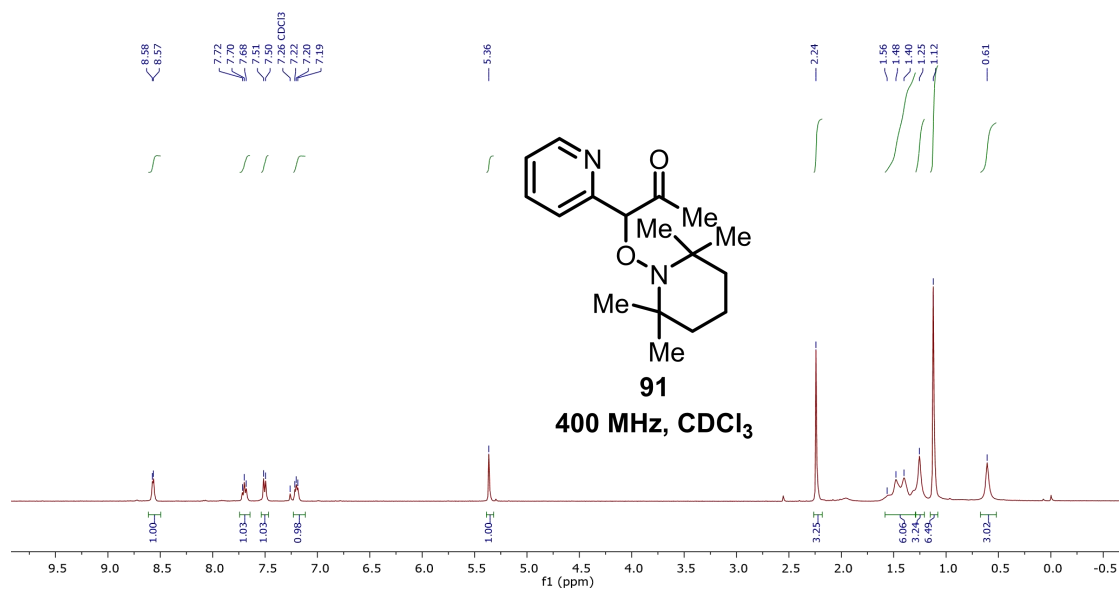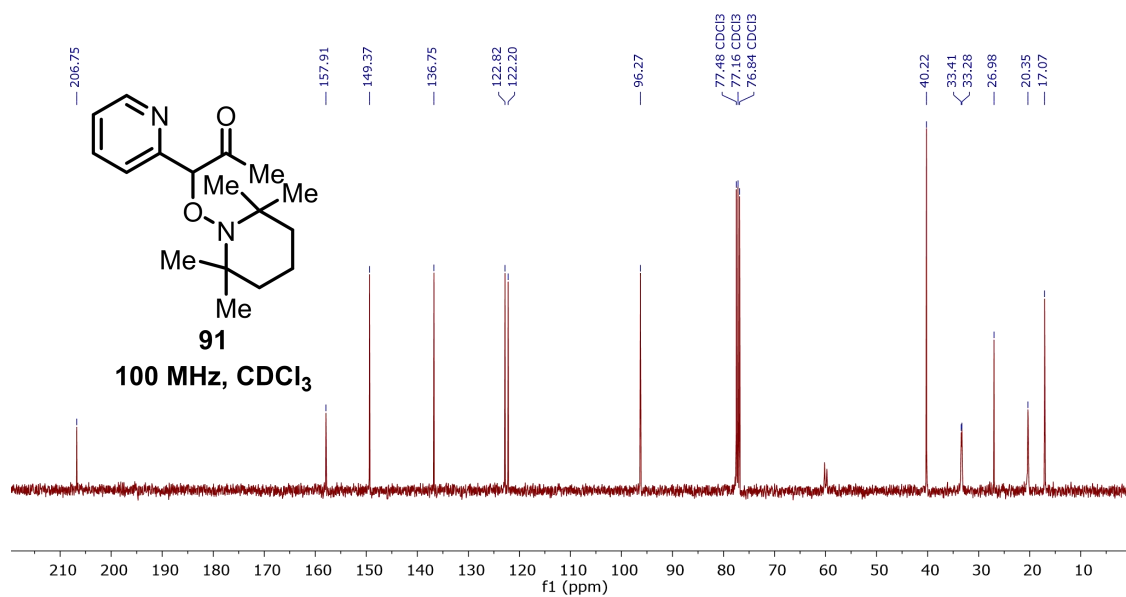

Supplement: d1gc04479f2.pdf [file d1gc04479f2.pdf]
